# Supplementary material for: Sequential regioselective arylation of pyrazolones with diaryliodonium salts
Source: Royal Society of Chemistry journal article supplement (doi:10.1039/d3ob01854g), 2023-12-21

## Supporting Information

### Sequential Regioselective Arylation of Pyrazolones with Diaryliodonium Salts

Wenbo Liao<sup>a#</sup>, Hairui Du<sup>a#</sup>, Mingxiu Chen<sup>a</sup>, Yan Xiong<sup>a</sup>, Heye Zhou<sup>a</sup>, Tao Qin<sup>\*a</sup>, and Bin Liu<sup>\*a</sup>

*<sup>a</sup>College of Materials and Chemical Engineering, Key Laboratory of Inorganic Nonmetallic Crystalline and Energy Conversion Materials, China Three Gorges University, Yichang, Hubei 443002, PR China China  
E-mail: qintao@ctgu.edu.cn; liubin1@ctgu.edu.cn.*

## Table of Contents

|                                                                  |            |
|------------------------------------------------------------------|------------|
| <b>1. General Information.....</b>                               | <b>S3</b>  |
| <b>2. Detailed Optimization Studies.....</b>                     | <b>S4</b>  |
| <b>3. Experimental Procedures.....</b>                           | <b>S7</b>  |
| <b>4. Analytical data of New Compounds.....</b>                  | <b>S10</b> |
| <b>5. References.....</b>                                        | <b>S21</b> |
| <b>6. <sup>1</sup>H and <sup>13</sup>C of New Compounds.....</b> | <b>S22</b> |

## 1. General Information

All reactions were monitored by thin layer chromatography (TLC) using Macherey-Nagel 0.20 mm silica gel 60 plates. Flash column chromatography was performed on silica gel 60 (particle size 300-400 mesh ASTM, purchased from Taizhou, China).  $^1\text{H}$ ,  $^{13}\text{C}$  spectra were recorded with, Bruker 400 MHz (Avance-400) instrument. All  $^1\text{H}$  NMR data are reported in  $\delta$  units, parts per million (ppm), and were measured relative to the residual proton signal in the deuterated solvent at 7.26 ppm ( $\text{CDCl}_3$ ). All  $^{13}\text{C}$  NMR spectra are decoupled and reported in ppm relative to the solvent signal at 77.16 ppm ( $\text{CDCl}_3$ ). High-resolution mass spectra HRMS (ESI-TOF) were recorded on Bruker microtof. Compounds were visualized by irradiation with UV light, or stained with iodine/silica gel, or potassium permanganate. Preparatory thin-layer chromatography (Prep-TLC) was performed on silica gel GF with UV 254 (20  $\times$  20 cm, 1000 microns, from Yantai Jiang you Silica Gel Development Co., Ltd.) and visualized with UV light.

**Materials.** Reaction solvents THF and toluene were distilled over sodium and stored under nitrogen atmosphere. While DCM, DCE and  $\text{CH}_3\text{CN}$  was distilled over  $\text{CaH}_2$  and stored under nitrogen atmosphere. Compounds **2a-2l** were known and prepared according to the previously reported procedures<sup>1-3</sup>. All other commercial reagents and solvents were purchased from Energy-Chemical Ltd, and used as received unless otherwise noted.

## 2. Detailed Optimization Studies

Table S1. Screening Reaction Conditions of 3a.<sup>a</sup>

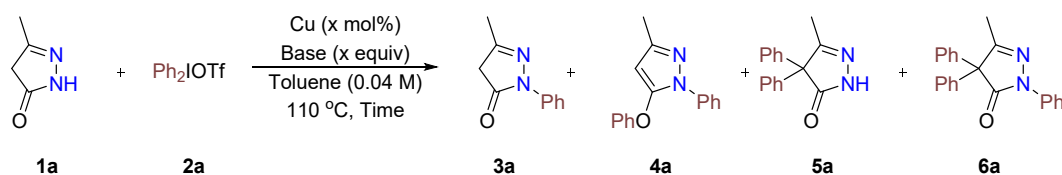

| Entry | 2a (equiv)  | Cu (mol%)                 | Base (equiv)                             | Time (h) | 3a/% <sup>b</sup> | 4a/% <sup>b</sup> | 5a/% <sup>b</sup> | 6a/% <sup>b</sup> |
|-------|-------------|---------------------------|------------------------------------------|----------|-------------------|-------------------|-------------------|-------------------|
| 1     | 5.0         | --                        | K <sub>2</sub> CO <sub>3</sub> (4.0)     | 12       | 12                | 7                 | 5                 | 26                |
| 2     | 5.0         | --                        | Cs <sub>2</sub> CO <sub>3</sub> (4.0)    | 12       | trace             | trace             | 6                 | 17                |
| 3     | 5.0         | --                        | Na <sub>2</sub> CO <sub>3</sub> (4.0)    | 12       | 0                 | trace             | 10                | trace             |
| 4     | 5.0         | --                        | NaH (4.0)                                | 12       | 0                 | 6                 | 9                 | 5                 |
| 5     | 5.0         | --                        | NaOH (4.0)                               | 12       | trace             | trace             | 11                | 6                 |
| 6     | 5.0         | --                        | DMAP (4.0)                               | 12       | 0                 | 4                 | 9                 | trace             |
| 7     | 5.0         | --                        | <sup>t</sup> BuOK (4.0)                  | 12       | 0                 | 5                 | 13                | 4                 |
| 8     | 5.0         | --                        | Et <sub>3</sub> N (4.0)                  | 12       | 0                 | trace             | trace             | trace             |
| 9     | 5.0         | CuI (10)                  | K <sub>2</sub> CO <sub>3</sub> (4.0)     | 12       | 21                | 49                | 0                 | 5                 |
| 10    | 1.05        | CuI (10)                  | K <sub>2</sub> CO <sub>3</sub> (4.0)     | 3        | 83                | 5                 | 0                 | trace             |
| 11    | 1.05        | CuI (10)                  | Na <sub>2</sub> CO <sub>3</sub> (4.0)    | 3        | 74                | 10                | 0                 | 0                 |
| 12    | 1.05        | CuI (10)                  | Cs <sub>2</sub> CO <sub>3</sub> (4.0)    | 3        | 0                 | trace             | trace             | 9                 |
| 13    | 1.05        | CuI (10)                  | <sup>t</sup> BuOK (4.0)                  | 3        | 0                 | 0                 | 0                 | trace             |
| 14    | 1.05        | CuI (10)                  | DMAP (4.0)                               | 3        | 0                 | trace             | 0                 | trace             |
| 15    | <b>1.05</b> | <b>CuI (10)</b>           | <b>K<sub>2</sub>CO<sub>3</sub> (2.0)</b> | <b>3</b> | <b>85</b>         | <b>5</b>          | <b>0</b>          | <b>trace</b>      |
| 16    | 1.05        | Cu(OTf) <sub>2</sub> (10) | K <sub>2</sub> CO <sub>3</sub> (2.0)     | 3        | 43                | 14                | trace             | trace             |
| 17    | 1.05        | CuBr <sub>2</sub> (10)    | K <sub>2</sub> CO <sub>3</sub> (2.0)     | 3        | 71                | trace             | 6                 | trace             |
| 18    | 1.05        | Cu <sub>2</sub> O (10)    | K <sub>2</sub> CO <sub>3</sub> (2.0)     | 3        | 73                | 6                 | 0                 | 0                 |
| 19    | 1.05        | CuO (10)                  | K <sub>2</sub> CO <sub>3</sub> (2.0)     | 3        | 21                | trace             | trace             | 3                 |
| 20    | 1.05        | CuI (10)                  | --                                       | 3        | 29                | 23                | 0                 | 0                 |

<sup>a</sup>Reaction conditions: 1a (0.2 mmol), 2a (x equiv), CuI (x mol%), base (x equiv) in 5 mL of Toluene at 110 °C.

<sup>b</sup>Yield determined by <sup>1</sup>H NMR spectroscopy using CH<sub>2</sub>Br<sub>2</sub> as an internal standard.

**Table S2. Screening Reaction Conditions of 4a.<sup>a</sup>**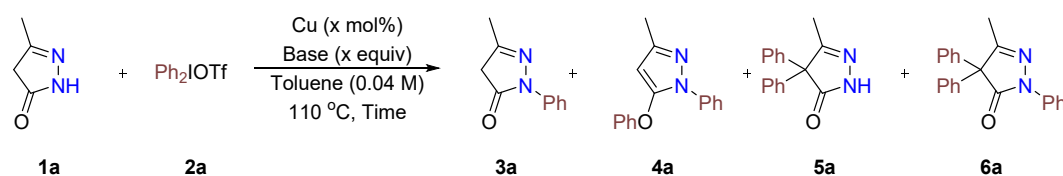

| Entry    | 2a (equiv) | Cu (mol%)                 | Base (equiv)                              | Tim (h)  | 3a/% <sup>b</sup> | 4a/% <sup>b</sup> | 5a/% <sup>b</sup> | 6a/% <sup>b</sup> |
|----------|------------|---------------------------|-------------------------------------------|----------|-------------------|-------------------|-------------------|-------------------|
| 1        | 2.5        | CuI (10)                  | Na <sub>2</sub> CO <sub>3</sub> (4.0)     | 3        | trace             | 81                | 0                 | 3                 |
| 2        | 2.5        | CuI (10)                  | K <sub>2</sub> CO <sub>3</sub> (4.0)      | 3        | 3                 | 78                | 0                 | 7                 |
| <b>3</b> | <b>2.5</b> | <b>CuI (10)</b>           | <b>Na<sub>2</sub>CO<sub>3</sub> (2.0)</b> | <b>3</b> | <b>trace</b>      | <b>83</b>         | <b>0</b>          | <b>trace</b>      |
| 7        | 2.5        | Cu(OTf) <sub>2</sub> (10) | Na <sub>2</sub> CO <sub>3</sub> (2.0)     | 3        | 26                | 37                | trace             | trace             |
| 8        | 2.5        | CuBr <sub>2</sub> (10)    | Na <sub>2</sub> CO <sub>3</sub> (2.0)     | 3        | trace             | 82                | 0                 | 0                 |
| 9        | 2.5        | CuO (10)                  | Na <sub>2</sub> CO <sub>3</sub> (2.0)     | 3        | 23                | 6                 | trace             | 9                 |
| 10       | 2.5        | Cu <sub>2</sub> O (10)    | Na <sub>2</sub> CO <sub>3</sub> (2.0)     | 3        | trace             | 81                | 0                 | trace             |

<sup>a</sup>Reaction conditions: 1a (0.2 mmol), 2a (2.5 equiv), CuI (x mol%), base (x equiv) in 5 mL of Toluene at 110 °C.

<sup>b</sup>Yield determined by <sup>1</sup>H NMR spectroscopy using CH<sub>2</sub>Br<sub>2</sub> as an internal standard.

**Table S3. Screening Reaction Conditions of 5a.<sup>a</sup>**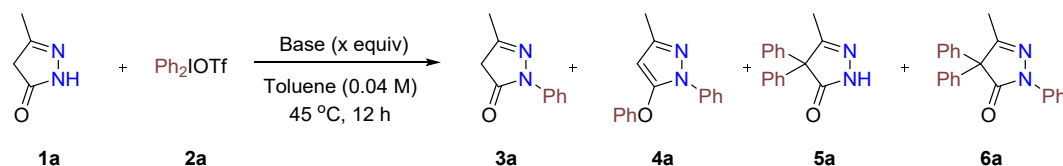

| Entry                | 2a (equiv) | Base (equiv)                             | 3a/% <sup>b</sup> | 4a/% <sup>b</sup> | 5a/% <sup>b</sup> | 6a/% <sup>b</sup> |
|----------------------|------------|------------------------------------------|-------------------|-------------------|-------------------|-------------------|
| 1                    | 2.2        | Et <sub>3</sub> N (4.0)                  | 0                 | 0                 | trace             | trace             |
| 2                    | 2.2        | NaOH (4.0)                               | trace             | 0                 | trace             | 9                 |
| 3                    | 2.2        | Na <sub>2</sub> CO <sub>3</sub> (4.0)    | 0                 | 0                 | 6                 | 0                 |
| 4                    | 2.2        | DMAP (4.0)                               | 0                 | 0                 | 11                | trace             |
| 5                    | 2.2        | <sup>t</sup> BuOK (4.0)                  | 0                 | 6                 | trace             | 8                 |
| 6                    | 2.2        | K <sub>2</sub> CO <sub>3</sub> (4.0)     | 0                 | 0                 | 57                | 4                 |
| <b>7<sup>c</sup></b> | <b>2.2</b> | <b>K<sub>2</sub>CO<sub>3</sub> (2.0)</b> | <b>trace</b>      | <b>0</b>          | <b>62</b>         | <b>trace</b>      |
| 8                    | 2.2        | Cs <sub>2</sub> CO <sub>3</sub> (4.0)    | tarce             | 0                 | 43                | 6                 |

<sup>a</sup>Reaction conditions: 1a (0.2 mmol), 2a (2.2 equiv), base (x equiv) in 5 mL of Toluene at 45 °C for 12 h. <sup>b</sup>Yield determined by <sup>1</sup>H NMR spectroscopy using CH<sub>2</sub>Br<sub>2</sub> as an internal standard. <sup>c</sup>18 h

**Table S4. Screening Reaction Conditions of 6a.<sup>a</sup>**

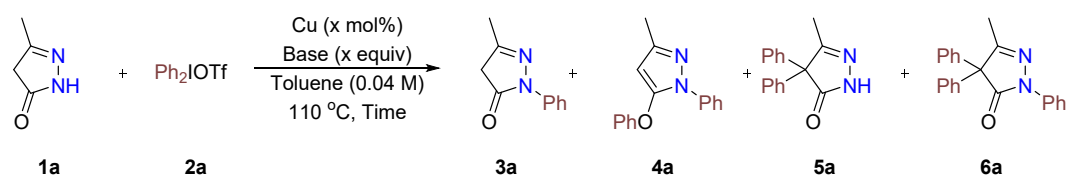

| Entry    | <b>2a</b><br>(equiv) | <b>Cu</b> (mol%)          | <b>Base</b><br>(equiv)                    | <b>Time</b> (h) | <b>3a</b> / <sup>b</sup> % | <b>4a</b> / <sup>b</sup> % | <b>5a</b> / <sup>b</sup> % | <b>6a</b> / <sup>b</sup> % |
|----------|----------------------|---------------------------|-------------------------------------------|-----------------|----------------------------|----------------------------|----------------------------|----------------------------|
| 1        | 4.0                  | CuI (10)                  | Cs <sub>2</sub> CO <sub>3</sub> (4.0)     | 6               | trace                      | 21                         | trace                      | 56                         |
| 2        | 4.0                  | CuI (10)                  | DMAP (4.0)                                | 6               | 8                          | 19                         | 0                          | 44                         |
| 3        | 4.0                  | CuI (10)                  | <sup>t</sup> BuOK (4.0)                   | 6               | trace                      | 16                         | 0                          | 31                         |
| 4        | 4.0                  | Cu(OTf) <sub>2</sub> (10) | Cs <sub>2</sub> CO <sub>3</sub> (4.0)     | 6               | trace                      | 61                         | trace                      | 16                         |
| 5        | 4.0                  | CuBr <sub>2</sub> (10)    | Cs <sub>2</sub> CO <sub>3</sub> (4.0)     | 6               | trace                      | 33                         | trace                      | 37                         |
| 6        | 4.0                  | CuO (10)                  | Cs <sub>2</sub> CO <sub>3</sub> (4.0)     | 6               | 0                          | 11                         | 0                          | 47                         |
| 7        | 4.0                  | Cu <sub>2</sub> O (10)    | Cs <sub>2</sub> CO <sub>3</sub> (4.0)     | 6               | 0                          | 14                         | 0                          | 50                         |
| 8        | 4.0                  | CuI (10)                  | Cs <sub>2</sub> CO <sub>3</sub> (2.0)     | 6               | trace                      | 27                         | 0                          | 34                         |
| <b>9</b> | <b>4.0</b>           | <b>CuI (1)</b>            | <b>Cs<sub>2</sub>CO<sub>3</sub> (4.0)</b> | <b>6</b>        | <b>trace</b>               | <b>10</b>                  | <b>0</b>                   | <b>68</b>                  |

<sup>a</sup>Reaction conditions: **1a** (0.2 mmol), **2a** (4 equiv), CuI (x mol%), base (x equiv) in 5 mL of Toluene at 110 °C.

<sup>b</sup>Yield determined by <sup>1</sup>H NMR spectroscopy using CH<sub>2</sub>Br<sub>2</sub> as an internal standard.

### 3. Experimental Procedures

#### a) General Procedure for 3

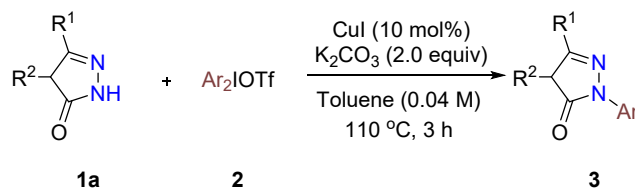

Added pyrazolones **1** (19.6 mg 0.2 mmol, 1.0 equiv), **2a** (1.05 equiv),  $CuI$  (3.8 mg, 0.1 equiv) and  $K_2CO_3$  (55.2 mg, 2 equiv) in 5.0 mL of toluene. The solution was submitted to a  $110\text{ }^\circ\text{C}$  oil bath and stirred for 3 hours, until the product was not increasing as indicated by TLC. The reaction mixture was then quenched with  $H_2O$ , extracted with  $CH_2Cl_2$  ( $3\times 10\text{ mL}$ ) and the combined organic layers were concentrated in vacuo. The resulting crude product was purified by flash column chromatography on silica gel to obtain product.

#### b) General Procedure for 4

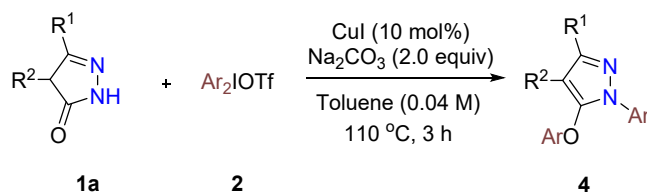

Added pyrazolones **1** (19.6 mg 0.2 mmol, 1.0 equiv), **2a** (2.5 equiv),  $CuI$  (3.8 mg, 0.1 equiv) and  $Na_2CO_3$  (42.4 mg, 2 equiv) in 5.0 mL of toluene. The solution was submitted to a  $110\text{ }^\circ\text{C}$  oil bath and stirred for 3 hours, until the product was not increasing as indicated by TLC. The reaction mixture was then quenched with  $H_2O$ , extracted with  $CH_2Cl_2$  ( $3\times 10\text{ mL}$ ) and the combined organic layers were concentrated in vacuo. The resulting crude product was purified by flash column chromatography on silica gel to obtain product.

#### c) General Procedure for 5

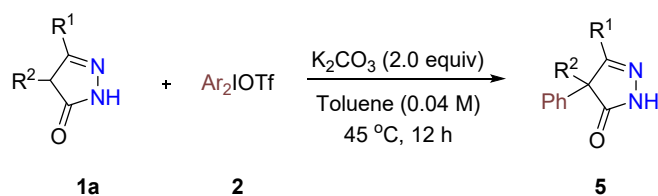

Added 5-methyl-2,4-dihydro-3H-pyrazol-3-one **1a** (19.6 mg 0.2 mmol, 1.0 equiv), **2** (2.2 equiv) and  $K_2CO_3$  (55.2 mg, 2 equiv) in 5.0 mL of toluene. The solution was warmed up to  $45\text{ }^\circ\text{C}$  and it was stirred for 12 hours, until the product was not increasing as indicated by TLC. The reaction

mixture was then quenched with H<sub>2</sub>O, extracted with CH<sub>2</sub>Cl<sub>2</sub> (3×10 mL) and the combined organic layers were concentrated in vacuo. The resulting crude product was purified by flash column chromatography on silica gel to obtain product.

#### d) General Procedure for 6

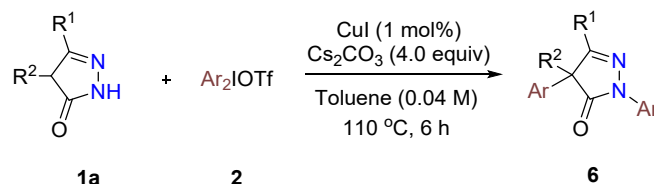

Added pyrazolones **1** (19.6 mg 0.2 mmol, 1.0 equiv), **2** (4.0 equiv), CuI (0.4 mg, 0.01 equiv.) and Cs<sub>2</sub>CO<sub>3</sub> (260.7 mg, 4.0 equiv.) in 5.0 mL of toluene. The solution was submitted to a 110 °C oil bath and stirred for 3 hours, until the product was not increasing as indicated by TLC. The reaction mixture was then quenched with H<sub>2</sub>O, extracted with CH<sub>2</sub>Cl<sub>2</sub> (3×10 mL) and the combined organic layers were concentrated in vacuo. The resulting crude product was purified by flash column chromatography on silica gel to obtain product.

#### e) General Procedure for 7, 8, 9

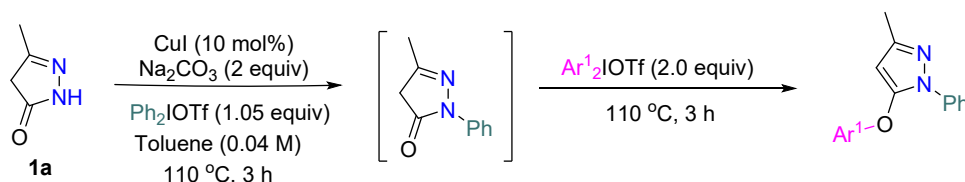

Added pyrazolones **1** (19.6 mg 0.2 mmol), diphenyliodonium trifluoromethanesulfonate **2a** (90.2 mg, 1.05 equiv), CuI (3.8 mg, 0.1 equiv.) and Na<sub>2</sub>CO<sub>3</sub> (42.4 mg, 2 equiv.) in 5.0 mL of toluene. The solution was submitted to a 110 °C oil bath and stirred for 3 hours, until the product was not increasing as indicated by TLC. Next another diaryliodonium salts (2.0 equiv.) are added. Then the solution continues stirred at 110 °C for 3 hours, until the product was not increasing as indicated by TLC. The reaction mixture was then quenched with H<sub>2</sub>O, extracted with CH<sub>2</sub>Cl<sub>2</sub> (3×10 mL) and the combined organic layers were concentrated in vacuo. The resulting crude product was purified by flash column chromatography on silica gel to obtain products.



**f) General Procedure for 10, 11, 12**

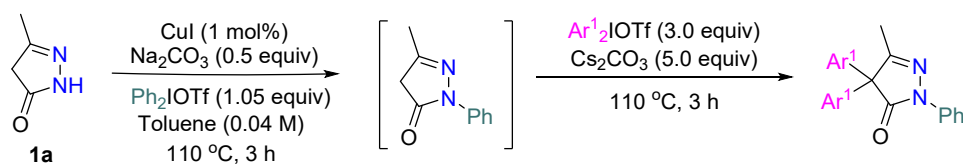

Added 5-methyl-2,4-dihydro-3H-pyrazol-3-one **1a** (19.6 mg 0.2 mmol, 1.0 equiv), diphenyliodonium trifluoromethanesulfonate **2a** (90.2 mg, 1.05 equiv), CuI (0.4 mg, 0.01 equiv.) and Na<sub>2</sub>CO<sub>3</sub> (10.6 mg, 0.5 equiv.) in 5.0 mL of toluene. The solution was submitted to a 110 °C oil bath and it was stirred for 3 hours, until the product was not increasing as indicated by TLC. Next another diaryliodonium salts (3.0 equiv.) and Cs<sub>2</sub>CO<sub>3</sub> (325.8 mg, 5.0 equiv.) were added. Then the solution continues stirred at 110 °C for 3 hours, until the product was not increasing as indicated by TLC. The reaction mixture was then quenched with H<sub>2</sub>O, extracted with CH<sub>2</sub>Cl<sub>2</sub> (3×10 mL) and the combined organic layers were concentrated in vacuo. The resulting crude product was purified by flash column chromatography on silica gel to obtain product.

## 4. Analytical data of New Compounds

### 5-Methyl-2-phenyl-2,4-dihydro-3H-pyrazol-3-one (3a)

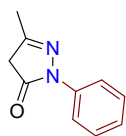

The crude was purified by flash chromatography using Petroleum ether/ Ethyl acetate 2:1 to afford **3a** as white solid (29.6 mg, 85% yield), TLC:  $R_f = 0.38$  (Petroleum ether : Ethyl acetate = 2:1) [UV].  $^1\text{H NMR}$  (400 MHz, Chloroform-*d*)  $\delta$  7.85 (dd,  $J = 8.8, 1.2$  Hz, 2H), 7.42 – 7.36 (m, 2H), 7.18 (t,  $J = 7.6$  Hz, 1H), 3.43 (s, 2H), 2.19 (s, 3H).  $^{13}\text{C NMR}$  (100 MHz, Chloroform-*d*)  $\delta$  170.7, 156.5, 138.1, 129.0, 125.2, 119.0, 43.2, 17.2. **HRMS** (ESI-TOF) ( $m/z$ ): Calcd for  $\text{C}_{10}\text{H}_{11}\text{N}_2\text{O}$  ( $[\text{M} + \text{H}]^+$ ), 175.0866, found, 175.0868.

### 2-(4-Fluorophenyl)-5-methyl-2,4-dihydro-3H-pyrazol-3-one (3b)

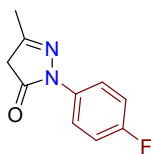

The crude was purified by flash chromatography using Petroleum ether/ Ethyl acetate 2:1 to afford **3b** as white solid (24.2 mg, 63% yield), TLC:  $R_f = 0.35$  (Petroleum ether : Ethyl acetate = 2:1) [UV].  $^1\text{H NMR}$  (400 MHz, Chloroform-*d*)  $\delta$  7.82 (dd,  $J = 9.2, 4.8$  Hz, 2H), 7.07 (t,  $J = 8.8$  Hz, 2H), 3.42 (s, 2H), 2.18 (s, 3H).  $^{13}\text{C NMR}$  (100 MHz, Chloroform-*d*)  $\delta$  170.4, 160.0 (d,  $J = 242.9$  Hz), 156.6, 134.3 (d,  $J = 2.8$  Hz), 120.4 (d,  $J = 8.0$  Hz), 115.6 (t,  $J = 22.4$  Hz), 43.1, 17.1. **HRMS** (ESI-TOF) ( $m/z$ ): Calcd for  $\text{C}_{10}\text{H}_{10}\text{FN}_2\text{O}$  ( $[\text{M} + \text{H}]^+$ ), 193.0772, found, 193.0778.

### 2-(4-Chlorophenyl)-5-methyl-2,4-dihydro-3H-pyrazol-3-one (3c)

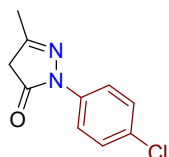

The crude was purified by flash chromatography using Petroleum ether/ Ethyl acetate 2:1 to afford **3c** as white solid (30.0 mg, 72% yield), TLC:  $R_f = 0.41$  (Petroleum ether : Ethyl acetate = 2:1) [UV].  $^1\text{H NMR}$  (400 MHz, Chloroform-*d*)  $\delta$  7.83 (d,  $J = 8.8$  Hz, 2H), 7.33 (d,  $J = 8.8$  Hz, 2H), 3.42 (s, 2H), 2.19 (s, 3H).  $^{13}\text{C NMR}$  (100 MHz, Chloroform-*d*)  $\delta$  170.5, 156.7, 136.8, 130.0, 129.0, 120.0, 43.2, 17.1. **HRMS** (ESI-TOF) ( $m/z$ ): Calcd for  $\text{C}_{10}\text{H}_{10}\text{ClN}_2\text{O}$  ( $[\text{M} + \text{H}]^+$ ), 209.0476, found, 209.0484.

### 2-(4-Bromophenyl)-5-methyl-2,4-dihydro-3H-pyrazol-3-one (3d)

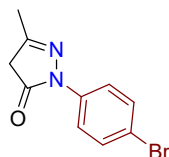

The crude was purified by flash chromatography using Petroleum ether/ Ethyl acetate 2:1 to afford **3d** as white solid (44.0 mg, 87% yield), TLC:  $R_f = 0.43$  (Petroleum ether : Ethyl acetate = 2:1) [UV].  $^1\text{H NMR}$  (400 MHz, Chloroform-*d*)  $\delta$  7.78 (d,  $J = 9.2$  Hz, 2H), 7.48 (d,  $J = 8.8$  Hz, 2H), 3.42 (s, 2H), 2.18 (s, 3H).  $^{13}\text{C NMR}$  (100 MHz, Chloroform-*d*)  $\delta$  170.6, 156.7, 137.3, 131.9, 120.2, 117.9, 43.2, 17.1. **HRMS** (ESI-TOF) ( $m/z$ ): Calcd for  $\text{C}_{10}\text{H}_{10}\text{BrN}_2\text{O}$  ( $[\text{M} + \text{H}]^+$ ), 252.9971, found, 252.9966.

### 5-Methyl-2-(4-(trifluoromethyl)phenyl)-2,4-dihydro-3H-pyrazol-3-one (3e)

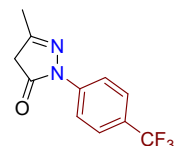

The crude was purified by flash chromatography using Petroleum ether/ Ethyl acetate 2:1 to afford **3e** as white solid (23.2 mg, 48% yield), TLC:  $R_f = 0.38$  (Petroleum ether : Ethyl acetate = 2:1) [UV].  $^1\text{H NMR}$  (400 MHz, Chloroform-*d*)  $\delta$  8.04 (d,  $J = 8.4$  Hz, 2H), 7.63 (d,  $J = 8.4$  Hz, 2H), 3.47 (s, 2H), 2.22 (s, 3H).  $^{13}\text{C NMR}$  (100 MHz, Chloroform-*d*)  $\delta$  170.9, 157.0, 141.0, 126.6 (d,  $J = 32.5$  Hz), 126.2 (dd,  $J = 7.6, 3.9$  Hz), 124.3 (d,  $J = 269.8$  Hz), 118.2, 43.3, 17.2. **HRMS** (ESI-TOF) ( $m/z$ ): Calcd for  $\text{C}_{11}\text{H}_{10}\text{F}_3\text{N}_2\text{O}$  ( $[\text{M} + \text{H}]^+$ ), 243.0740, found, 243.0741.

### 2-(4-Methoxyphenyl)-5-methyl-2,4-dihydro-3H-pyrazol-3-one (3f)

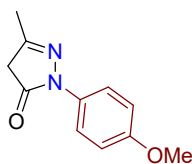

The crude was purified by flash chromatography using Petroleum ether/ Ethyl acetate 1:1 to afford **3f** as white solid (13.5 mg, 33% yield), TLC:  $R_f = 0.38$  (Petroleum ether : Ethyl acetate = 1:1) [UV].  $^1\text{H NMR}$  (400 MHz, Chloroform-*d*)  $\delta$  7.72 (d,  $J = 9.2$  Hz, 2H), 6.91 (d,  $J = 9.2$  Hz, 2H), 3.81 (s, 3H), 3.41 (s, 2H), 2.18 (s, 3H).  $^{13}\text{C NMR}$  (100 MHz, Chloroform-*d*)  $\delta$  170.4, 157.2, 156.3, 131.5, 121.0, 114.1, 55.6, 43.1, 17.1. **HRMS** (ESI-TOF) ( $m/z$ ): Calcd for  $\text{C}_{11}\text{H}_{13}\text{N}_2\text{O}_2$  ( $[\text{M} + \text{H}]^+$ ), 205.0972, found, 205.0980.

### 5-Methyl-2-(*p*-tolyl)-2,4-dihydro-3H-pyrazol-3-one (3g)

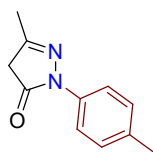

The crude was purified by flash chromatography using Petroleum ether/ Ethyl acetate 2:1 to afford **3g** as white solid (27.5 mg, 73% yield), TLC:  $R_f = 0.35$  (Petroleum ether : Ethyl acetate = 2:1) [UV].  $^1\text{H NMR}$  (400 MHz, Chloroform-*d*)  $\delta$  7.71 (d,  $J = 8.4$  Hz, 2H), 7.18 (d,  $J = 8.8$  Hz, 2H), 3.40 (s, 2H), 2.33 (s, 3H), 2.17 (s, 3H).  $^{13}\text{C NMR}$  (100 MHz, Chloroform-*d*)  $\delta$  170.5, 156.3, 135.7, 134.9, 129.5, 119.1, 43.2, 21.1, 17.1. **HRMS** (ESI-TOF) ( $m/z$ ): Calcd for  $\text{C}_{11}\text{H}_{13}\text{N}_2\text{O}$  ( $[\text{M} + \text{H}]^+$ ), 189.1023, found, 189.1030.

### 2-(4-(Tert-butyl)phenyl)-5-methyl-2,4-dihydro-3H-pyrazol-3-one (3h)

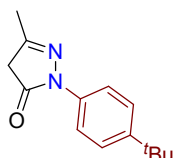

The crude was purified by flash chromatography using Petroleum ether/ Ethyl acetate 2:1 to afford **3h** as white solid (42.3 mg, 92% yield), TLC:  $R_f = 0.45$  (Petroleum ether : Ethyl acetate = 2:1) [UV].  $^1\text{H NMR}$  (400 MHz, Chloroform-*d*)  $\delta$  7.73 (d,  $J = 8.8$  Hz, 2H), 7.40 (d,  $J = 8.8$  Hz, 2H), 3.40 (s, 2H), 2.17 (s, 3H), 1.32 (s, 9H).  $^{13}\text{C NMR}$  (100 MHz, Chloroform-*d*)  $\delta$  170.6, 156.3, 148.2, 135.6, 125.8, 119.0, 43.1, 34.5, 31.5, 17.1. **HRMS** (ESI-TOF) ( $m/z$ ): Calcd for  $\text{C}_{14}\text{H}_{19}\text{N}_2\text{O}$  ( $[\text{M} + \text{H}]^+$ ), 231.1492, found, 231.1489.

### 2-(3,4-Dimethylphenyl)-5-methyl-2,4-dihydro-3H-pyrazol-3-one (3i)

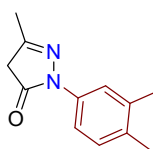

The crude was purified by flash chromatography using Petroleum ether/ Ethyl acetate 2:1 to afford **3i** as white solid (17.8 mg, 44% yield), TLC:  $R_f = 0.37$  (Petroleum ether : Ethyl acetate = 2:1) [UV].  $^1\text{H NMR}$  (400 MHz, Chloroform-*d*)  $\delta$  7.59 (s, 1H), 7.54 (d,  $J = 8.0$  Hz, 1H), 7.13 (d,  $J = 8.4$  Hz, 1H), 3.40 (s, 2H), 2.28 (s, 3H), 2.24 (s, 3H), 2.18 (s, 3H).  $^{13}\text{C NMR}$  (100 MHz, Chloroform-*d*)  $\delta$  170.6, 156.2, 137.2, 135.9, 133.7, 129.9, 120.4, 116.8, 43.1, 20.1, 19.4, 17.1. **HRMS** (ESI-TOF) ( $m/z$ ): Calcd for  $\text{C}_{12}\text{H}_{15}\text{N}_2\text{O}$  ( $[\text{M} + \text{H}]^+$ ), 203.1179, found, 203.1176.

### 2-(2,4-Dimethylphenyl)-5-methyl-2,4-dihydro-3H-pyrazol-3-one (3j)

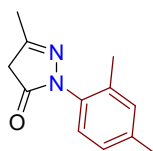

The crude was purified by flash chromatography using Petroleum ether/ Ethyl acetate 1:1 to afford **3j** as white solid (24.7 mg, 61% yield), TLC:  $R_f = 0.27$  (Petroleum ether : Ethyl acetate = 1:1) [UV].  $^1\text{H NMR}$  (400 MHz, Chloroform-*d*)  $\delta$  7.15 (d,  $J = 8.0$  Hz, 1H), 7.09 – 7.02 (m, 2H), 3.37 (s, 2H), 2.32 (s, 3H), 2.22 (s, 3H), 2.15 (s, 3H).  $^{13}\text{C NMR}$  (100 MHz, Chloroform-*d*)  $\delta$  171.5, 156.2, 138.6, 134.9, 133.2, 131.8, 127.4, 126.5, 41.7, 21.1, 18.3, 17.1. **HRMS** (ESI-TOF) ( $m/z$ ): Calcd for  $\text{C}_{12}\text{H}_{15}\text{N}_2\text{O}$  ( $[\text{M} + \text{H}]^+$ ), 203.1179, found, 203.1184.

### 2-(2,5-Dimethylphenyl)-5-methyl-2,4-dihydro-3H-pyrazol-3-one (3k)

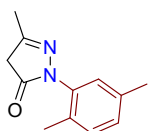

The crude was purified by flash chromatography using Petroleum ether/ Ethyl acetate 1:1 to afford **3k** as white solid (21.0 mg, 52% yield), TLC:  $R_f = 0.32$  (Petroleum ether : Ethyl acetate = 1:1) [UV].  $^1\text{H NMR}$  (400 MHz, Chloroform-*d*)  $\delta$  7.15 (d,  $J = 8.0$  Hz, 1H), 7.08 (s, 1H), 7.05 (d,  $J = 8.0$  Hz, 1H), 3.37 (s, 2H), 2.32 (s, 3H), 2.22 (s, 3H), 2.16 (s, 3H).  $^{13}\text{C NMR}$  (100 MHz, Chloroform-*d*)  $\delta$  171.4, 156.3, 136.5, 135.5, 132.0, 131.1, 129.5, 127.1, 41.8, 20.9, 18.0, 17.2. **HRMS** (ESI-TOF) ( $m/z$ ): Calcd for  $\text{C}_{12}\text{H}_{15}\text{N}_2\text{O}$  ( $[\text{M} + \text{H}]^+$ ), 203.1179, found, 203.1186.

### 2-Mesityl-5-methyl-2,4-dihydro-3H-pyrazol-3-one (3l)

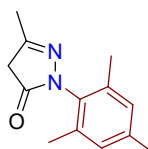

The crude was purified by flash chromatography using Petroleum ether/ Ethyl acetate 1:1 to afford **3l** as white solid (15.6 mg, 36% yield), TLC:  $R_f = 0.25$  (Petroleum ether : Ethyl acetate = 1:1) [UV].  $^1\text{H NMR}$  (400 MHz, Chloroform-*d*)  $\delta$  6.92 (s, 2H), 3.39 (s, 2H), 2.28 (s, 3H), 2.16 (d,  $J = 3.6$  Hz, 9H).  $^{13}\text{C NMR}$  (100 MHz, Chloroform-*d*)  $\delta$  170.6, 156.3, 148.2, 135.6, 125.8, 119.0, 43.1, 34.6, 31.5, 17.1. **HRMS** (ESI-TOF) ( $m/z$ ): Calcd for  $\text{C}_{13}\text{H}_{17}\text{N}_2\text{O}$  ( $[\text{M} + \text{H}]^+$ ), 217.1335, found, 217.1333.

### 5-methyl-2-(pyridin-3-yl)-2,4-dihydro-3H-pyrazol-3-one (3m)

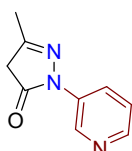

The crude was purified by flash chromatography using Ethyl acetate/ Methanol 30:1 to afford **3m** as white solid (15.1 mg, 43% yield), TLC:  $R_f = 0.40$  (Ethyl acetate/ Methanol 30:1) [UV].  $^1\text{H NMR}$  (400 MHz, Chloroform-*d*)  $\delta$  9.15 (d,  $J = 2.8$  Hz, 1H), 8.39 (d,  $J = 4.8$  Hz, 1H), 8.23 (d,  $J = 8.4$  Hz, 1H), 7.30 (dd,  $J = 8.4, 4.8$  Hz, 1H), 3.49 (s, 2H), 2.20 (s, 3H).  $^{13}\text{C NMR}$  (100 MHz, Chloroform-*d*)  $\delta$  170.8, 155.7, 145.7, 140.5, 135.1, 125.7, 123.4, 45.6, 9.6. **HRMS** (ESI-TOF) ( $m/z$ ): Calcd for  $\text{C}_9\text{H}_{10}\text{N}_3\text{O}$  ( $[\text{M} + \text{H}]^+$ ), 176.0818, found, 176.0813.

### 2,5-diphenyl-2,4-dihydro-3H-pyrazol-3-one (3n)

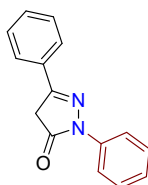

The crude was purified by flash chromatography using Petroleum ether/ Ethyl acetate 3:1 to afford **3n** as colorless oil (40.6 mg, 86% yield), TLC:  $R_f = 0.46$  (Petroleum ether : Ethyl acetate = 3:1) [UV].  $^1\text{H NMR}$  (400 MHz, Chloroform-*d*)  $\delta$  7.98 (d,  $J = 7.6$  Hz, 2H), 7.81 – 7.72 (m, 2H), 7.50 – 7.38 (m, 5H), 7.22 (t,  $J = 7.2$  Hz, 1H), 3.82 (s, 2H).  $^{13}\text{C NMR}$  (100 MHz, Chloroform-*d*)  $\delta$  170.4, 154.8, 138.2, 131.0, 130.8, 129.0, 129.0, 126.1, 125.4, 119.2, 39.7. **HRMS** (ESI-TOF) ( $m/z$ ): Calcd for  $\text{C}_{15}\text{H}_{13}\text{N}_2\text{O}$  ( $[\text{M} + \text{H}]^+$ ), 237.1022, found, 237.1031.

### 3-Methyl-5-phenoxy-1-phenyl-1H-pyrazole (4a)

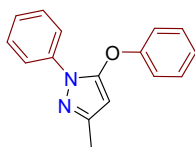

The crude was purified by flash chromatography using Petroleum ether/ Ethyl acetate 25:1 to afford **4a** as colorless oil (41.5 mg, 83% yield), TLC:  $R_f = 0.24$  (Petroleum ether : Ethyl acetate = 25:1) [UV].  $^1\text{H NMR}$  (400 MHz, Chloroform-*d*)  $\delta$  7.72 (d,  $J = 7.6$  Hz, 2H), 7.45 – 7.35 (m, 4H), 7.29 (d,  $J = 6.0$  Hz, 1H), 7.18 (dd,  $J = 11.2, 7.2$  Hz, 3H), 5.58 (s, 1H), 2.31 (s, 3H).  $^{13}\text{C NMR}$  (100 MHz, Chloroform-*d*)  $\delta$  156.4, 151.7, 149.0, 138.4, 130.0, 129.1, 126.6, 124.7, 122.3, 118.2, 91.8, 14.7. **HRMS** (ESI-TOF) ( $m/z$ ): Calcd for  $\text{C}_{16}\text{H}_{15}\text{N}_2\text{O}$  ( $[\text{M} + \text{H}]^+$ ), 251.1179, found, 251.1181.

### 5-(4-Fluorophenoxy)-1-(4-fluorophenyl)-3-methyl-1H-pyrazole (4b)

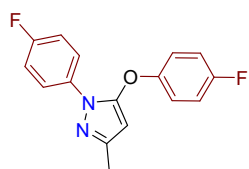

The crude was purified by flash chromatography using Petroleum ether/Ethyl acetate 25:1 to afford **4b** as colorless oil (41.8 mg, 73% yield), TLC:  $R_f = 0.21$  (Petroleum ether : Ethyl acetate = 25:1) [UV].  $^1\text{H NMR}$  (400 MHz, Chloroform-*d*)  $\delta$  7.65 (dd,  $J = 9.2, 4.8$  Hz, 2H), 7.13 – 7.01 (m, 6H), 5.48 (s, 1H), 2.26 (s, 3H).  $^{13}\text{C NMR}$  (100 MHz, Chloroform-*d*)  $\delta$  162.4, 160.8, 159.2 (d,  $J = 158.4$  Hz), 152.1 (t,  $J = 3.1$  Hz), 149.1, 134.6 (d,  $J = 3.0$  Hz), 124.2 (d,  $J = 8.4$  Hz), 119.8 (d,  $J = 8.3$  Hz), 116.6 (d,  $J = 22.3$  Hz), 115.9 (d,  $J = 22.7$  Hz), 91.1, 14.5. **HRMS** (ESI-TOF) (m/z): Calcd for  $\text{C}_{16}\text{H}_{13}\text{F}_2\text{N}_2\text{O}$  ( $[\text{M} + \text{H}]^+$ ), 287.0991, found, 287.0990.

#### 5-(4-Chlorophenoxy)-1-(4-chlorophenyl)-3-methyl-1H-pyrazole (**4c**)

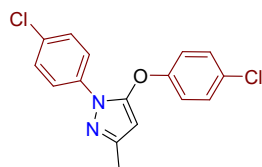

The crude was purified by flash chromatography using Petroleum ether/Ethyl acetate 25:1 to afford **4c** as colorless oil (44.5 mg, 70% yield), TLC:  $R_f = 0.25$  (Petroleum ether : Ethyl acetate = 25:1) [UV].  $^1\text{H NMR}$  (400 MHz, Chloroform-*d*)  $\delta$  7.63 (d,  $J = 8.8$  Hz, 2H), 7.33 (dd,  $J = 21.2, 8.8$  Hz, 4H), 7.06 (d,  $J = 8.8$  Hz, 2H), 5.56 (s, 1H), 2.27 (s, 3H).  $^{13}\text{C NMR}$  (100 MHz, Chloroform-*d*)  $\delta$  154.7, 151.3, 149.4, 136.9, 132.2, 130.1, 130.0, 129.2, 123.3, 119.4, 92.2, 14.7. **HRMS** (ESI-TOF) (m/z): Calcd for  $\text{C}_{16}\text{H}_{13}\text{Cl}_2\text{N}_2\text{O}$  ( $[\text{M} + \text{H}]^+$ ), 319.0400, found, 319.0394.

#### 5-(4-Bromophenoxy)-1-(4-bromophenyl)-3-methyl-1H-pyrazole (**4d**)

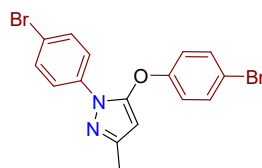

The crude was purified by flash chromatography using Petroleum ether/Ethyl acetate 25:1 to afford **4d** as colorless oil (61.7 mg, 76% yield), TLC:  $R_f = 0.30$  (Petroleum ether : Ethyl acetate = 25:1) [UV].  $^1\text{H NMR}$  (400 MHz, Chloroform-*d*)  $\delta$  7.59 – 7.49 (m, 4H), 7.46 (d,  $J = 8.9$  Hz, 2H), 7.00 (d,  $J = 8.8$  Hz, 2H), 5.56 (s, 1H), 2.27 (s, 3H).  $^{13}\text{C NMR}$  (100 MHz, Chloroform-*d*)  $\delta$  155.3, 151.2, 149.5, 137.4, 133.1, 132.2, 123.6, 120.1, 119.8, 117.5, 92.4, 14.7. **HRMS** (ESI-TOF) (m/z): Calcd for  $\text{C}_{16}\text{H}_{13}\text{Br}_2\text{N}_2\text{O}$  ( $[\text{M} + \text{H}]^+$ ), 406.9389, found, 406.9392.

#### 5-(4-(Tert-butyl)phenoxy)-1-(4-(tert-butyl)phenyl)-3-methyl-1H-pyrazole (**4e**)

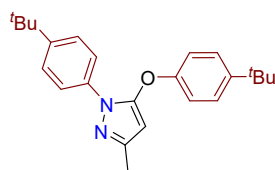

The crude was purified by flash chromatography using Petroleum ether/Ethyl acetate 25:1 to afford **4e** as colorless oil (49.3 mg, 68% yield), TLC:  $R_f = 0.31$  (Petroleum ether : Ethyl acetate = 25:1) [UV].  $^1\text{H NMR}$  (400 MHz, Chloroform-*d*)  $\delta$  7.63 (d,  $J = 8.8$  Hz, 2H), 7.42 (d,  $J = 8.8$  Hz, 2H), 7.37 (d,  $J = 8.8$  Hz, 2H), 7.09 (d,  $J = 8.8$  Hz, 2H), 5.53 (s, 1H), 2.28 (s, 3H), 1.33 (d,  $J = 1.6$  Hz, 18H).  $^{13}\text{C NMR}$  (100 MHz, Chloroform-*d*)  $\delta$  154.2, 152.0, 149.4, 148.6, 147.5, 136.1, 126.7, 125.9, 121.9, 117.7, 91.2, 34.6, 34.5, 31.6, 31.4, 14.7. **HRMS** (ESI-TOF) (m/z): Calcd for  $\text{C}_{24}\text{H}_{31}\text{N}_2\text{O}$  ( $[\text{M} + \text{H}]^+$ ), 363.2431, found, 363.2435.

#### 5-(3,4-Dimethylphenoxy)-1-(3,4-dimethylphenyl)-3-methyl-1H-pyrazole (**4f**)

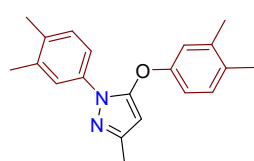

The crude was purified by flash chromatography using Petroleum ether/Ethyl acetate 25:1 to afford **4f** as colorless oil (42.3 mg, 69% yield), TLC:  $R_f = 0.26$  (Petroleum ether : Ethyl acetate = 25:1) [UV].  $^1\text{H NMR}$  (400 MHz, Chloroform-*d*)  $\delta$  7.49 (d,  $J = 2.8$  Hz, 1H), 7.40 (dd,  $J = 8.0, 2.4$  Hz,

1H), 7.12 (dd,  $J = 21.2, 8.4$  Hz, 2H), 6.94 (d,  $J = 2.8$  Hz, 1H), 6.88 (dd,  $J = 8.4, 2.8$  Hz, 1H), 5.49 (s, 1H), 2.29 – 2.23 (m, 15H).  $^{13}\text{C}$  NMR (100 MHz, Chloroform-*d*)  $\delta$  154.5, 152.2, 148.5, 138.4, 137.4, 136.3, 135.0, 132.8, 130.7, 130.0, 123.6, 119.7, 119.5, 115.5, 91.1, 20.0, 20.0, 19.4, 19.1, 14.7. HRMS (ESI-TOF) ( $m/z$ ): Calcd for  $\text{C}_{20}\text{H}_{23}\text{N}_2\text{O}$  ( $[\text{M} + \text{H}]^+$ ), 307.1805, found, 307.1797.

#### 5-(2,4-Dimethylphenoxy)-1-(2,4-dimethylphenyl)-3-methyl-1H-pyrazole (4g)

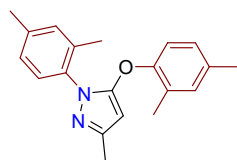

The crude was purified by flash chromatography using Petroleum ether/Ethyl acetate 25:1 to afford **4g** as colorless oil (22.0 mg, 36% yield), TLC:  $R_f = 0.15$  (Petroleum ether : Ethyl acetate = 25:1) [UV].  $^1\text{H}$  NMR (400 MHz, Chloroform-*d*)  $\delta$  7.24 (d,  $J = 8.0$  Hz, 1H), 7.10 (s, 1H), 7.06 (d,  $J = 8.0$  Hz, 1H), 6.96 (d,  $J = 10.0$  Hz, 3H), 5.28 (s, 1H), 2.35 (s, 3H), 2.28 (s, 3H), 2.24 (d,  $J = 5.2$  Hz, 6H), 2.13 (s, 3H).  $^{13}\text{C}$  NMR (100 MHz, Chloroform-*d*)  $\delta$  153.5, 152.3, 148.4, 138.7, 135.7, 134.5, 134.4, 132.1, 131.4, 128.7, 127.7, 127.6, 127.1, 118.6, 88.3, 21.2, 20.8, 17.7, 15.9, 14.7. HRMS (ESI-TOF) ( $m/z$ ): Calcd for  $\text{C}_{20}\text{H}_{23}\text{N}_2\text{O}$  ( $[\text{M} + \text{H}]^+$ ), 307.1805, found, 307.1801.

#### 5-(2,5-Dimethylphenoxy)-1-(2,5-dimethylphenyl)-3-methyl-1H-pyrazole (4h)

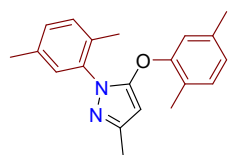

The crude was purified by flash chromatography using Petroleum ether/Ethyl acetate 25:1 to afford **4h** as colorless oil (14.7 mg, 24% yield), TLC:  $R_f = 0.17$  (Petroleum ether : Ethyl acetate = 25:1) [UV].  $^1\text{H}$  NMR (400 MHz, Chloroform-*d*)  $\delta$  7.16 (d,  $J = 8.0$  Hz, 2H), 7.10 (d,  $J = 7.6$  Hz, 1H), 7.04 (d,  $J = 7.6$  Hz, 1H), 6.86 (d,  $J = 9.2$  Hz, 2H), 5.33 (s, 1H), 2.27 (dd,  $J = 27.2, 14.8$  Hz, 12H), 2.11 (s, 3H).  $^{13}\text{C}$  NMR (100 MHz, Chloroform-*d*)  $\delta$  154.3, 153.1, 148.6, 137.2, 136.8, 136.2, 132.7, 131.2, 130.6, 129.7, 128.4, 125.8, 125.6, 119.1, 88.8, 21.1, 20.9, 17.4, 15.6, 14.8. HRMS (ESI-TOF) ( $m/z$ ): Calcd for  $\text{C}_{20}\text{H}_{23}\text{N}_2\text{O}$  ( $[\text{M} + \text{H}]^+$ ), 307.1805, found, 307.1811.

#### 5-Phenoxy-1,3-diphenyl-1H-pyrazole (4i)

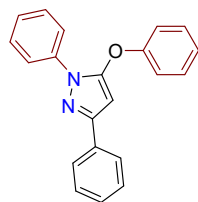

The crude was purified by flash chromatography using Petroleum ether/Ethyl acetate 25:1 to afford **4i** as colorless oil (48.7 mg, 78% yield), TLC:  $R_f = 0.44$  (Petroleum ether : Ethyl acetate = 25:1) [UV].  $^1\text{H}$  NMR (400 MHz, Chloroform-*d*)  $\delta$  7.90 – 7.80 (m, 4H), 7.49 – 7.29 (m, 8H), 7.22 (d,  $J = 8.0$  Hz, 3H), 6.09 (s, 1H).  $^{13}\text{C}$  NMR (100 MHz, Chloroform-*d*)  $\delta$  156.3, 152.4, 150.8, 138.5, 133.3, 130.1, 129.1, 128.7, 128.3, 126.9, 125.6, 124.8, 122.6, 118.3, 89.3. HRMS (ESI-TOF) ( $m/z$ ): Calcd for  $\text{C}_{21}\text{H}_{17}\text{N}_2\text{O}$  ( $[\text{M} + \text{H}]^+$ ), 313.1335, found, 313.1331.

#### 4-Benzyl-3-methyl-5-phenoxy-1-phenyl-1H-pyrazole (4j)

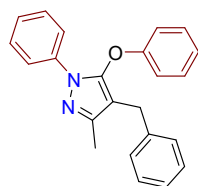

The crude was purified by flash chromatography using Petroleum ether/Ethyl acetate 25:1 to afford **4j** as colorless oil (30.6 mg, 45% yield), TLC:  $R_f = 0.19$  (Petroleum ether : Ethyl acetate = 25:1) [UV].  $^1\text{H}$  NMR (400 MHz, Chloroform-*d*)  $\delta$  7.62 (d,  $J = 7.6$  Hz, 2H), 7.33 (t,  $J = 8.0$  Hz, 2H), 7.25 – 7.12 (m, 6H), 7.08 (d,  $J = 6.8$  Hz, 2H), 7.01 (t,  $J = 7.6$  Hz, 1H), 6.88 (d,  $J = 7.6$  Hz, 2H), 3.59 (s, 2H), 2.22 (s, 3H).  $^{13}\text{C}$  NMR (100 MHz, Chloroform-*d*)  $\delta$  156.8, 148.8, 146.4, 139.7, 138.5, 129.9, 129.1, 128.4, 128.4, 126.5, 126.1, 123.3, 121.9, 115.7, 106.7, 28.6, 13.4. HRMS (ESI-TOF) ( $m/z$ ): Calcd for  $\text{C}_{23}\text{H}_{21}\text{N}_2\text{O}$  ( $[\text{M} + \text{H}]^+$ ), 341.1649, found, 341.1644.

#### 5-Methyl-4,4-diphenyl-2,4-dihydro-3H-pyrazol-3-one (5a)

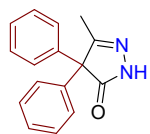

The crude was purified by flash chromatography using Petroleum ether/ Ethyl acetate 3:1 to afford **5a** as white solid (31.0 mg, 62% yield), TLC:  $R_f = 0.34$  (Petroleum ether : Ethyl acetate = 3:1) [UV].  $^1\text{H NMR}$  (400 MHz,  $\text{DMSO-}d_6$ )  $\delta$  11.41 (s, 1H), 7.44 – 7.36 (m, 6H), 7.09 (d,  $J = 6.8$  Hz, 4H), 1.94 (s, 3H).  $^{13}\text{C NMR}$  (100 MHz,  $\text{DMSO-}d_6$ )  $\delta$  177.2, 160.5, 137.3, 129.0, 128.0, 127.8, 65.8, 15.1. **HRMS** (ESI-TOF) ( $m/z$ ): Calcd for  $\text{C}_{16}\text{H}_{15}\text{N}_2\text{O}$  ( $[\text{M} + \text{H}]^+$ ), 251.1179, found, 251.1182.

#### 4,4-Bis(4-fluorophenyl)-5-methyl-2,4-dihydro-3H-pyrazol-3-one (5b)

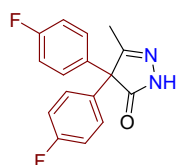

The crude was purified by flash chromatography using Petroleum ether/ Ethyl acetate 3:1 to afford **5b** as white solid (26.9 mg, 47% yield), TLC:  $R_f = 0.33$  (Petroleum ether : Ethyl acetate = 3:1) [UV].  $^1\text{H NMR}$  (400 MHz,  $\text{DMSO-}d_6$ )  $\delta$  11.50 (s, 1H), 7.25 (t,  $J = 8.8$  Hz, 4H), 7.12 (dd,  $J = 9.2, 5.2$  Hz, 4H), 1.95 (s, 3H).  $^{13}\text{C NMR}$  (100 MHz,  $\text{DMSO-}d_6$ )  $\delta$  177.0, 162.9, 160.4 (d,  $J = 15.6$  Hz), 133.4 (d,  $J = 2.2$  Hz), 130.2 (d,  $J = 8.4$  Hz), 116.0 (d,  $J = 21.5$  Hz), 64.4, 15.0. **HRMS** (ESI-TOF) ( $m/z$ ): Calcd for  $\text{C}_{16}\text{H}_{13}\text{F}_2\text{N}_2\text{O}$  ( $[\text{M} + \text{H}]^+$ ), 287.0991, found, 287.0987.

#### 4,4-Bis(4-chlorophenyl)-5-methyl-2,4-dihydro-3H-pyrazol-3-one (5c)

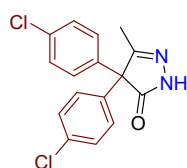

The crude was purified by flash chromatography using Petroleum ether/ Ethyl acetate 3:1 to afford **5c** as white solid (36.9 mg, 58% yield), TLC:  $R_f = 0.38$  (Petroleum ether : Ethyl acetate = 3:1) [UV].  $^1\text{H NMR}$  (400 MHz,  $\text{DMSO-}d_6$ )  $\delta$  11.56 (s, 1H), 7.49 (d,  $J = 8.8$  Hz, 4H), 7.10 (d,  $J = 8.8$  Hz, 4H), 1.95 (s, 3H).  $^{13}\text{C NMR}$  (100 MHz,  $\text{DMSO-}d_6$ )  $\delta$  176.5, 159.9, 135.9, 132.9, 130.0, 129.1, 64.7, 15.0. **HRMS** (ESI-TOF) ( $m/z$ ): Calcd for  $\text{C}_{16}\text{H}_{13}\text{Cl}_2\text{N}_2\text{O}$  ( $[\text{M} + \text{H}]^+$ ), 319.0400, found, 319.0402.

#### 4,4-Bis(4-bromophenyl)-5-methyl-2,4-dihydro-3H-pyrazol-3-one (5d)

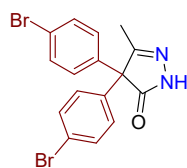

The crude was purified by flash chromatography using Petroleum ether/ Ethyl acetate 3:1 to afford **5d** as white solid (49.5 mg, 61% yield), TLC:  $R_f = 0.40$  (Petroleum ether : Ethyl acetate = 3:1) [UV].  $^1\text{H NMR}$  (400 MHz,  $\text{DMSO-}d_6$ )  $\delta$  11.55 (s, 1H), 7.62 (d,  $J = 8.4$  Hz, 4H), 7.03 (d,  $J = 8.4$  Hz, 4H), 1.95 (s, 3H).  $^{13}\text{C NMR}$  (100 MHz,  $\text{DMSO-}d_6$ )  $\delta$  176.4, 159.8, 136.3, 132.1, 130.3, 121.5, 64.9, 15.0. **HRMS** (ESI-TOF) ( $m/z$ ): Calcd for  $\text{C}_{16}\text{H}_{13}\text{Br}_2\text{N}_2\text{O}$  ( $[\text{M} + \text{H}]^+$ ), 406.9389, found, 406.9386.

#### 5-Methyl-4,4-di-p-tolyl-2,4-dihydro-3H-pyrazol-3-one (5e)

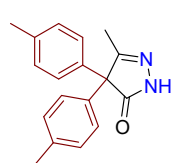

The crude was purified by flash chromatography using Petroleum ether/ Ethyl acetate 3:1 to afford **5e** as white solid (22.8 mg, 41% yield), TLC:  $R_f = 0.38$  (Petroleum ether : Ethyl acetate = 3:1) [UV].  $^1\text{H NMR}$  (400 MHz,  $\text{DMSO-}d_6$ )  $\delta$  11.33 (s, 1H), 7.20 (d,  $J = 8.4$  Hz, 4H), 6.96 (d,  $J = 8.4$  Hz, 4H), 2.30 (s, 6H), 1.91 (s, 3H).  $^{13}\text{C NMR}$  (100 MHz,  $\text{DMSO-}d_6$ )  $\delta$  177.4, 160.8, 137.1, 134.4, 129.5, 128.0, 65.1, 20.6, 15.1. **HRMS** (ESI-TOF) ( $m/z$ ): Calcd for  $\text{C}_{18}\text{H}_{19}\text{N}_2\text{O}$  ( $[\text{M} + \text{H}]^+$ ), 279.1492, found, 279.1498.

#### 4,4-Bis(4-(tert-butyl)phenyl)-5-methyl-2,4-dihydro-3H-pyrazol-3-one (5f)

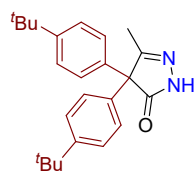

The crude was purified by flash chromatography using Petroleum ether/ Ethyl acetate 3:1 to afford **5f** as white solid (58.0 mg, 80% yield), TLC:  $R_f = 0.56$  (Petroleum ether : Ethyl acetate = 3:1) [UV].  $^1\text{H NMR}$  (400 MHz,  $\text{DMSO-}d_6$ )  $\delta$  11.35 (s, 1H), 7.42 (d,  $J = 8.8$  Hz, 4H), 7.01 (d,  $J = 8.4$  Hz, 4H), 1.92 (s, 3H), 1.27 (s, 18H).  $^{13}\text{C NMR}$  (100 MHz,  $\text{DMSO-}d_6$ )  $\delta$  177.4, 160.8, 150.1, 134.3, 127.8, 125.7, 65.1, 34.3, 31.1, 15.1. **HRMS** (ESI-TOF) ( $m/z$ ): Calcd for  $\text{C}_{24}\text{H}_{31}\text{N}_2\text{O}$  ( $[\text{M} + \text{H}]^+$ ), 363.2431, found, 363.2430.

#### 4,4-Bis(3,4-dimethylphenyl)-5-methyl-2,4-dihydro-3H-pyrazol-3-one (5g)

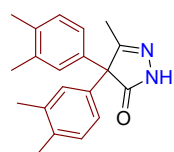

The crude was purified by flash chromatography using Petroleum ether/ Ethyl acetate 3:1 to afford **5g** as white solid (31.8 mg, 52% yield), TLC:  $R_f = 0.39$  (Petroleum ether : Ethyl acetate = 3:1) [UV].  $^1\text{H NMR}$  (400 MHz,  $\text{DMSO-}d_6$ )  $\delta$  11.28 (s, 1H), 7.14 (d,  $J = 8.0$  Hz, 2H), 6.82 (s, 2H), 6.78 (d,  $J = 7.6$  Hz, 2H), 2.19 (d,  $J = 10.0$  Hz, 12H), 1.91 (s, 3H).  $^{13}\text{C NMR}$  (100 MHz,  $\text{DMSO-}d_6$ )  $\delta$  177.5, 160.9, 136.7, 135.8, 134.8, 129.9, 128.9, 125.5, 65.1, 19.6, 19.0, 15.2. **HRMS** (ESI-TOF) ( $m/z$ ): Calcd for  $\text{C}_{20}\text{H}_{23}\text{N}_2\text{O}$  ( $[\text{M} + \text{H}]^+$ ), 307.1805, found, 307.1807.

#### 4,4-Bis(2,4-dimethylphenyl)-5-methyl-2,4-dihydro-3H-pyrazol-3-one (5h)

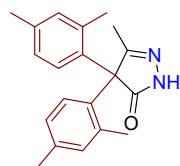

The crude was purified by flash chromatography using Petroleum ether/ Ethyl acetate 3:1 to afford **5h** as white solid (16.5 mg, 27% yield), TLC:  $R_f = 0.36$  (Petroleum ether : Ethyl acetate = 3:1) [UV].  $^1\text{H NMR}$  (400 MHz,  $\text{DMSO-}d_6$ )  $\delta$  12.14 (s, 1H), 7.03 (s, 1H), 6.99 (d,  $J = 7.6$  Hz, 1H), 6.96 – 6.90 (m, 2H), 6.83 (d,  $J = 8.0$  Hz, 1H), 6.72 (d,  $J = 8.0$  Hz, 1H), 2.24 (s, 3H), 2.15 (d,  $J = 10.4$  Hz, 6H), 2.06 (d,  $J = 6.8$  Hz, 6H).  $^{13}\text{C NMR}$  (100 MHz,  $\text{DMSO-}d_6$ )  $\delta$  178.1, 157.7, 152.9, 136.8, 136.1, 131.3, 130.8, 130.5, 128.0, 127.0, 126.7, 126.2, 116.6, 105.8, 62.9, 20.7, 20.1, 19.7, 15.8, 10.3. **HRMS** (ESI-TOF) ( $m/z$ ): Calcd for  $\text{C}_{20}\text{H}_{23}\text{N}_2\text{O}$  ( $[\text{M} + \text{H}]^+$ ), 307.1805, found, 307.1799.

#### 4,4,5-triphenyl-2,4-dihydro-3H-pyrazol-3-one (5i)

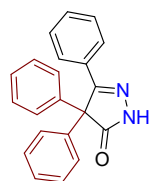

The crude was purified by flash chromatography using Petroleum ether/ Ethyl acetate 3:1 to afford **5i** as colorless oil (33.1 mg, 53% yield), TLC:  $R_f = 0.44$  (Petroleum ether : Ethyl acetate = 3:1) [UV].  $^1\text{H NMR}$  (400 MHz, Chloroform- $d$ )  $\delta$  9.83 (s, 1H), 7.63 (d,  $J = 7.2$  Hz, 2H), 7.42 (dd,  $J = 7.6, 2.0$  Hz, 4H), 7.37 – 7.32 (m, 6H), 7.29 (d,  $J = 7.2$  Hz, 1H), 7.24 (t,  $J = 7.2$  Hz, 2H).  $^{13}\text{C NMR}$  (100 MHz, Chloroform- $d$ )  $\delta$  179.4, 161.7, 136.4, 131.5, 130.0, 129.0, 129.0, 128.5, 128.3, 127.4, 65.3. **HRMS** (ESI-TOF) ( $m/z$ ): Calcd for  $\text{C}_{21}\text{H}_{17}\text{N}_2\text{O}$  ( $[\text{M} + \text{H}]^+$ ), 313.1335, found, 313.1339.

#### 4-benzyl-5-methyl-4-phenyl-2,4-dihydro-3H-pyrazol-3-one (5j)

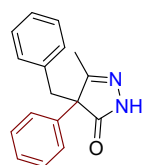

The crude was purified by flash chromatography using Petroleum ether/ Ethyl acetate 3:1 to afford **5j** as white solid (24.8 mg, 47% yield), TLC:  $R_f = 0.34$  (Petroleum ether : Ethyl acetate = 3:1) [UV].  $^1\text{H NMR}$  (400 MHz,  $\text{DMSO-}d_6$ )  $\delta$  10.97 (s, 1H), 7.43 (t,  $J = 7.2$  Hz, 2H), 7.36 (d,  $J = 7.2$  Hz, 1H), 7.30 – 7.18 (m, 7H), 3.44 (q,  $J = 13.2$  Hz, 2H), 1.90 (s, 3H).  $^{13}\text{C NMR}$  (100 MHz,  $\text{DMSO-}d_6$ )  $\delta$  178.1,



161.2, 136.3, 135.4, 129.4, 129.1, 128.1, 127.8, 127.0, 126.5, 61.9, 37.3, 14.6. **HRMS** (ESI-TOF) (m/z): Calcd for C<sub>17</sub>H<sub>17</sub>N<sub>2</sub>O ([M + H]<sup>+</sup>), 265.1336, found, 265.1327.

#### 5-Methyl-2,4,4-triphenyl-2,4-dihydro-3H-pyrazol-3-one (6a)

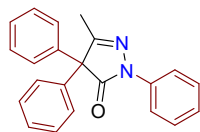

The crude was purified by flash chromatography using Petroleum ether/ Ethyl acetate 40:1 to afford **6a** as colorless oil (44.4 mg, 68% yield), TLC: R<sub>f</sub> = 0.27 (Petroleum ether : Ethyl acetate = 40:1) [UV]. **<sup>1</sup>H NMR** (400 MHz, Chloroform-*d*) 7.99 (d, *J* = 7.6 Hz, 2H), 7.44 – 7.34 (m, 8H), 7.25 – 7.19 (m, 5H), 2.17 (s, 3H). **<sup>13</sup>C NMR** (100 MHz, Chloroform-*d*) δ 173.76, 161.97, 138.19, 137.33, 129.20, 129.00, 128.60, 128.34, 125.29, 119.03, 69.14, 15.64. **HRMS** (ESI-TOF) (m/z): Calcd for C<sub>22</sub>H<sub>19</sub>N<sub>2</sub>O ([M + H]<sup>+</sup>), 327.1492, found, 327.1500.

#### 2,4,4-Tris(4-fluorophenyl)-5-methyl-2,4-dihydro-3H-pyrazol-3-one (6b)

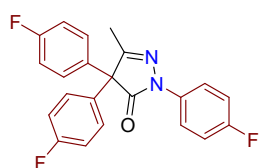

The crude was purified by flash chromatography using Petroleum ether/ Ethyl acetate 40:1 to afford **6b** as colorless oil (38.8 mg, 51% yield), TLC: R<sub>f</sub> = 0.29 (Petroleum ether : Ethyl acetate = 40:1) [UV]. **<sup>1</sup>H NMR** (400 MHz, Chloroform-*d*) δ 7.94 (dd, *J* = 9.2, 4.8 Hz, 2H), 7.19 (dd, *J* = 8.8, 5.2 Hz, 4H), 7.09 (td, *J* = 8.8, 4.4 Hz, 6H), 2.15 (s, 3H). **<sup>13</sup>C NMR** (100 MHz, Chloroform-*d*) δ 173.3, 164.0, 161.5 (t, *J* = 12.3 Hz), 159.0, 134.2 (d, *J* = 2.9 Hz), 132.9 (d, *J* = 3.5 Hz), 130.3 (d, *J* = 8.4 Hz), 120.8 (d, *J* = 7.9 Hz), 116.4 (d, *J* = 21.7 Hz), 115.8 (d, *J* = 22.5 Hz), 67.5, 15.4. **HRMS** (ESI-TOF) (m/z): Calcd for C<sub>22</sub>H<sub>16</sub>F<sub>3</sub>N<sub>2</sub>O ([M + H]<sup>+</sup>), 381.1209, found, 381.1215.

#### 2,4,4-Tris(4-chlorophenyl)-5-methyl-2,4-dihydro-3H-pyrazol-3-one (6c)

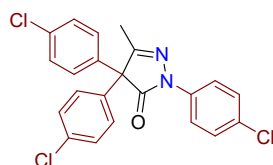

The crude was purified by flash chromatography using Petroleum ether/ Ethyl acetate 40:1 to afford **6c** as colorless oil (33.4 mg, 39% yield), TLC: R<sub>f</sub> = 0.35 (Petroleum ether : Ethyl acetate = 40:1) [UV]. **<sup>1</sup>H NMR** (400 MHz, Chloroform-*d*) δ 7.93 (d, *J* = 8.8 Hz, 2H), 7.37 (d, *J* = 8.4 Hz, 6H), 7.13 (d, *J* = 8.4 Hz, 4H), 2.15 (s, 3H). **<sup>13</sup>C NMR** (100 MHz, Chloroform-*d*) δ 172.9, 161.3, 136.5, 135.3, 134.9, 130.7, 129.8, 129.6, 129.1, 120.1, 67.9, 15.6. **HRMS** (ESI-TOF) (m/z): Calcd for C<sub>22</sub>H<sub>16</sub>Cl<sub>3</sub>N<sub>2</sub>O ([M + H]<sup>+</sup>), 429.0323, found, 429.0328.

#### 2,4,4-Tris(4-bromophenyl)-5-methyl-2,4-dihydro-3H-pyrazol-3-one (6d)

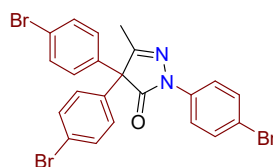

The crude was purified by flash chromatography using Petroleum ether/ Ethyl acetate 40:1 to afford **6d** as colorless oil (53.7 mg, 48% yield), TLC: R<sub>f</sub> = 0.38 (Petroleum ether : Ethyl acetate = 40:1) [UV]. **<sup>1</sup>H NMR** (400 MHz, Chloroform-*d*) δ 7.88 (d, *J* = 8.8 Hz, 2H), 7.52 (dd, *J* = 8.8, 2.8 Hz, 6H), 7.07 (d, *J* = 8.8 Hz, 4H), 2.14 (s, 3H). **<sup>13</sup>C NMR** (100 MHz, Chloroform-*d*) δ 172.8, 161.2, 137.0, 135.7, 132.6, 132.1, 130.1, 123.1, 120.4, 118.4, 68.1, 15.6. **HRMS** (ESI-TOF) (m/z): Calcd for C<sub>22</sub>H<sub>16</sub>Br<sub>3</sub>N<sub>2</sub>O ([M + H]<sup>+</sup>), 560.8808, found, 560.8804.

#### 5-Methyl-2,4,4-tri-p-tolyl-2,4-dihydro-3H-pyrazol-3-one (6e)

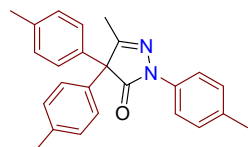

The crude was purified by flash chromatography using Petroleum ether/

Ethyl acetate 40:1 to afford **6e** as colorless oil (38.3 mg, 52% yield), TLC:  $R_f = 0.25$  (Petroleum ether : Ethyl acetate = 40:1) [UV].  $^1\text{H NMR}$  (400 MHz, Chloroform-*d*)  $\delta$  7.86 (d,  $J = 8.4$  Hz, 2H), 7.23 – 7.17 (m, 6H), 7.12 (d,  $J = 8.4$  Hz, 4H), 2.36 (s, 9H), 2.15 (s, 3H).  $^{13}\text{C NMR}$  (100 MHz, Chloroform-*d*)  $\delta$  173.9, 162.1, 138.1, 135.9, 134.8, 134.5, 129.8, 129.4, 128.4, 119.1, 68.5, 21.2, 21.1, 15.5. **HRMS** (ESI-TOF) ( $m/z$ ): Calcd for  $\text{C}_{25}\text{H}_{25}\text{N}_2\text{O}$  ( $[\text{M} + \text{H}]^+$ ), 369.1962, found, 369.1953.

#### 2,4,4-Tris(4-(tert-butyl)phenyl)-5-methyl-2,4-dihydro-3H-pyrazol-3-one (6f)

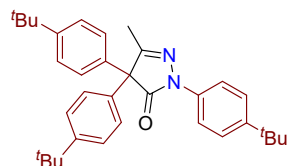

The crude was purified by flash chromatography using Petroleum ether/ Ethyl acetate 40:1 to afford **6f** as colorless oil (54.4 mg, 55% yield), TLC:  $R_f = 0.41$  (Petroleum ether : Ethyl acetate = 40:1) [UV].  $^1\text{H NMR}$  (400 MHz, Chloroform-*d*)  $\delta$  7.89 (d,  $J = 8.8$  Hz, 2H), 7.40 (dd,  $J = 18.8, 8.8$  Hz, 6H), 7.15 (d,  $J = 8.8$  Hz, 4H), 2.15 (s, 3H), 1.32 (d,  $J = 5.2$  Hz, 27H).  $^{13}\text{C NMR}$  (100 MHz, Chloroform-*d*)  $\delta$  174.1, 162.3, 151.1, 148.1, 135.8, 134.3, 128.2, 126.1, 125.8, 118.9, 68.5, 34.7, 34.6, 31.5, 31.4, 15.6. **HRMS** (ESI-TOF) ( $m/z$ ): Calcd for  $\text{C}_{34}\text{H}_{43}\text{N}_2\text{O}$  ( $[\text{M} + \text{H}]^+$ ), 495.3370, found, 495.3364.

#### 2,4,4-Tris(3,4-dimethylphenyl)-5-methyl-2,4-dihydro-3H-pyrazol-3-one (6g)

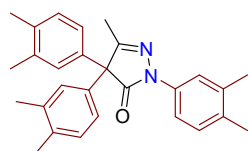

The crude was purified by flash chromatography using Petroleum ether/ Ethyl acetate 40:1 to afford **6g** as colorless oil (26.3 mg, 32% yield), TLC:  $R_f = 0.20$  (Petroleum ether : Ethyl acetate = 40:1) [UV].  $^1\text{H NMR}$  (400 MHz, Chloroform-*d*)  $\delta$  7.80 (s, 1H), 7.70 (d,  $J = 10.8$  Hz, 1H), 7.14 (dd,  $J = 12.4, 8.0$  Hz, 3H), 7.01 – 6.91 (m, 4H), 2.29 (s, 3H), 2.26 (s, 9H), 2.23 (s, 6H), 2.14 (s, 3H).  $^{13}\text{C NMR}$  (100 MHz, Chloroform-*d*)  $\delta$  174.0, 162.3, 137.4, 137.2, 136.7, 136.2, 134.9, 133.5, 130.3, 129.9, 129.5, 126.0, 120.2, 116.6, 68.6, 20.1, 20.1, 19.6, 19.4, 15.6. **HRMS** (ESI-TOF) ( $m/z$ ): Calcd for  $\text{C}_{28}\text{H}_{31}\text{N}_2\text{O}$  ( $[\text{M} + \text{H}]^+$ ), 411.2431, found, 411.2432.

#### 2,4,4,5-tetraphenyl-2,4-dihydro-3H-pyrazol-3-one (6h)

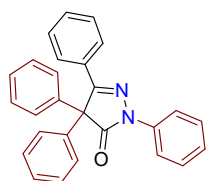

The crude was purified by flash chromatography using Petroleum ether/ Ethyl acetate 40:1 to afford **6h** as colorless oil (44.2 mg, 57% yield), TLC:  $R_f = 0.24$  (Petroleum ether/ Ethyl acetate 40:1) [UV].  $^1\text{H NMR}$  (400 MHz, Chloroform-*d*)  $\delta$  8.11 (d,  $J = 7.6$  Hz, 2H), 7.76 (d,  $J = 7.2$  Hz, 2H), 7.48 – 7.41 (m, 6H), 7.39 – 7.31 (m, 7H), 7.29 (d,  $J = 7.6$  Hz, 2H), 7.24 (d,  $J = 7.6$  Hz, 1H).  $^{13}\text{C NMR}$  (100 MHz, Chloroform-*d*)  $\delta$  175.0, 160.3, 138.3, 136.8, 131.1, 130.3, 129.1, 129.0, 129.0, 128.6, 128.4, 127.8, 125.5, 119.3, 67.7. **HRMS** (ESI-TOF) ( $m/z$ ): Calcd for  $\text{C}_{27}\text{H}_{21}\text{N}_2\text{O}$  ( $[\text{M} + \text{H}]^+$ ), 389.1647, found, 389.1650.

#### 4-benzyl-5-methyl-2,4-diphenyl-2,4-dihydro-3H-pyrazol-3-one (6i)

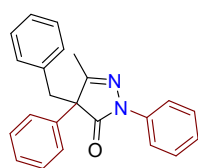

The crude was purified by flash chromatography using Petroleum ether/ Ethyl acetate 20:1 to afford **6i** as colorless oil (40.8 mg, 60% yield), TLC:  $R_f = 0.21$  (Petroleum ether/ Ethyl acetate 20:1) [UV].  $^1\text{H NMR}$  (400 MHz, Chloroform-*d*)  $\delta$  7.65 (d,  $J = 7.6$  Hz, 2H), 7.43 (t,  $J = 7.2$  Hz, 2H), 7.39 – 7.29 (m, 5H), 7.20 (s, 6H), 3.81 (d,  $J = 13.2$  Hz, 1H), 3.40 (d,  $J = 13.2$  Hz, 1H), 2.10 (s, 3H).  $^{13}\text{C NMR}$  (100 MHz, Chloroform-*d*)  $\delta$  174.6, 162.2, 137.7, 135.8, 134.6, 129.5, 129.3, 128.8, 128.6, 128.4, 127.6, 126.6, 125.4, 119.6, 64.9, 39.0, 15.1. **HRMS** (ESI-TOF) ( $m/z$ ): Calcd for

C<sub>23</sub>H<sub>21</sub>N<sub>2</sub>O ([M + H]<sup>+</sup>), 341.1647, found, 341.1644.

### 3-Methyl-1-phenyl-5-(*p*-tolylloxy)-1*H*-pyrazole (7)

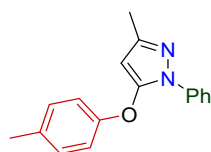

The crude was purified by flash chromatography using Petroleum ether/Ethyl acetate 25:1 to afford **7** as colorless oil (32.2 mg, 61% yield), TLC: R<sub>f</sub> = 0.23 (Petroleum ether : Ethyl acetate = 25:1) [UV]. <sup>1</sup>H NMR (400 MHz, Chloroform-*d*) δ 7.71 (d, *J* = 7.6 Hz, 2H), 7.43 – 7.37 (m, 2H), 7.25 (t, *J* = 7.6 Hz, 1H), 7.15 (d, *J* = 8.8 Hz, 2H), 7.03 (d, *J* = 8.8 Hz, 2H), 5.49 (s, 1H), 2.33 (s, 3H), 2.27 (s, 3H). <sup>13</sup>C NMR (100 MHz, Chloroform-*d*) δ 154.2, 152.3, 149.0, 138.5, 134.4, 130.4, 129.1, 126.5, 122.3, 118.2, 91.3, 20.9, 14.7. HRMS (ESI-TOF) (*m/z*): Calcd for C<sub>17</sub>H<sub>17</sub>N<sub>2</sub>O ([M + H]<sup>+</sup>), 265.1335, found, 265.1329.

### 5-(4-Bromophenoxy)-3-methyl-1-phenyl-1*H*-pyrazole (8)

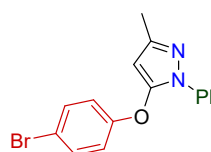

The crude was purified by flash chromatography using Petroleum ether/Ethyl acetate 25:1 to afford **8** as colorless oil (34.8 mg, 53% yield), TLC: R<sub>f</sub> = 0.19 (Petroleum ether : Ethyl acetate = 25:1) [UV]. <sup>1</sup>H NMR (400 MHz, Chloroform-*d*) δ 7.66 (d, *J* = 7.6 Hz, 2H), 7.48 – 7.39 (m, 4H), 7.29 (d, *J* = 8.0 Hz, 1H), 7.02 (d, *J* = 8.8 Hz, 2H), 5.60 (s, 1H), 2.31 (s, 3H). <sup>13</sup>C NMR (100 MHz, Chloroform-*d*) δ 155.5, 150.9, 149.1, 138.2, 133.0, 129.1, 126.8, 122.4, 119.7, 117.2, 92.2, 14.7. HRMS (ESI-TOF) (*m/z*): Calcd for C<sub>16</sub>H<sub>14</sub>BrN<sub>2</sub>O ([M + H]<sup>+</sup>), 329.0284, found, 329.0285.

### 5-(4-(Tert-butyl)phenoxy)-3-methyl-1-phenyl-1*H*-pyrazole (9)

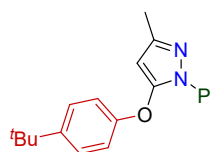

The crude was purified by flash chromatography using Petroleum ether/Ethyl acetate 25:1 to afford **9** as colorless oil (33.7 mg, 55% yield), TLC: R<sub>f</sub> = 0.31 (Petroleum ether : Ethyl acetate = 25:1) [UV]. <sup>1</sup>H NMR (400 MHz, Chloroform-*d*) δ 7.72 (d, *J* = 7.6 Hz, 2H), 7.43 – 7.35 (m, 4H), 7.25 (t, *J* = 7.2 Hz, 1H), 7.10 – 7.05 (m, 2H), 5.53 (s, 1H), 2.28 (s, 3H), 1.32 (s, 9H). <sup>13</sup>C NMR (100 MHz, Chloroform-*d*) δ 154.0, 152.2, 149.0, 147.7, 138.5, 129.0, 126.8, 126.5, 122.3, 117.8, 91.4, 34.5, 31.6, 14.7. HRMS (ESI-TOF) (*m/z*): Calcd for C<sub>20</sub>H<sub>23</sub>N<sub>2</sub>O ([M + H]<sup>+</sup>), 307.1805, found, 307.1804.

### 5-Methyl-2-phenyl-4,4-di-*p*-tolyl-2,4-dihydro-3*H*-pyrazol-3-one (10)

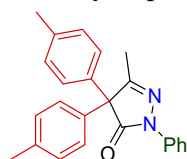

The crude was purified by flash chromatography using Petroleum ether/Ethyl acetate 40:1 to afford **10** as colorless oil (27.6 mg, 39% yield), TLC: R<sub>f</sub> = 0.26 (Petroleum ether : Ethyl acetate = 40:1) [UV]. <sup>1</sup>H NMR (400 MHz, Chloroform-*d*) δ 8.01 (d, *J* = 7.6 Hz, 2H), 7.41 (t, *J* = 8.0 Hz, 2H), 7.20 (d, *J* = 8.0 Hz, 5H), 7.13 (d, *J* = 8.4 Hz, 4H), 2.37 (s, 6H), 2.17 (s, 3H). <sup>13</sup>C NMR (100 MHz, Chloroform-*d*) δ 174.1, 162.2, 138.3, 138.1, 134.4, 129.8, 128.9, 128.4, 125.1, 119.0, 68.5, 21.2, 15.5. HRMS (ESI-TOF) (*m/z*): Calcd for C<sub>24</sub>H<sub>23</sub>N<sub>2</sub>O ([M + H]<sup>+</sup>), 355.1805, found, 355.1808.

### 4,4-Bis(4-bromophenyl)-5-methyl-2-phenyl-2,4-dihydro-3*H*-pyrazol-3-one (11)

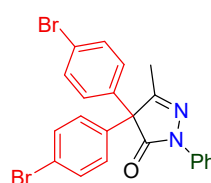

The crude was purified by flash chromatography using Petroleum ether/Ethyl acetate 40:1 to afford **11** as colorless oil (35.7 mg, 37% yield), TLC: R<sub>f</sub> = 0.35 (Petroleum ether : Ethyl acetate = 40:1) [UV]. <sup>1</sup>H NMR (400 MHz,

Chloroform-*d*)  $\delta$  7.96 (d,  $J = 7.6$  Hz, 2H), 7.52 (d,  $J = 8.8$  Hz, 4H), 7.45 – 7.38 (m, 2H), 7.21 (t,  $J = 7.6$  Hz, 1H), 7.09 (d,  $J = 8.8$  Hz, 4H), 2.15 (s, 3H).  $^{13}\text{C}$  NMR (100 MHz, Chloroform-*d*)  $\delta$  172.8, 160.8, 137.9, 135.9, 132.5, 130.2, 129.1, 125.6, 123.0, 119.0, 68.1, 15.5. HRMS (ESI-TOF) ( $m/z$ ): Calcd for  $\text{C}_{22}\text{H}_{17}\text{Br}_2\text{N}_2\text{O}$  ( $[\text{M} + \text{H}]^+$ ), 482.9702, found, 482.9698.

#### 4,4-bis(4-(tert-butyl)phenyl)-5-methyl-2-phenyl-2,4-dihydro-3H-pyrazol-3-one (12)

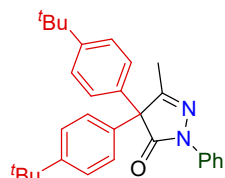

The crude was purified by flash chromatography using Petroleum ether/Ethyl acetate 40:1 to afford **12** as colorless oil (37.7 mg, 43% yield), TLC:  $R_f = 0.38$  (Petroleum ether : Ethyl acetate = 40:1) [UV].  $^1\text{H}$  NMR (400 MHz, Chloroform-*d*)  $\delta$  8.00 (d,  $J = 7.6$  Hz, 2H), 7.43 – 7.36 (m, 6H), 7.22 – 7.14 (m, 5H), 2.17 (s, 3H), 1.32 (s, 18H).  $^{13}\text{C}$  NMR (100 MHz, Chloroform-*d*)  $\delta$  174.2, 162.4, 151.2, 138.3, 134.3, 129.0, 128.2, 126.1, 125.1, 119.1, 68.6, 34.7, 31.4, 15.6. HRMS (ESI-TOF) ( $m/z$ ): Calcd for  $\text{C}_{30}\text{H}_{35}\text{N}_2\text{O}$  ( $[\text{M} + \text{H}]^+$ ), 439.2744, found, 439.2743.

## 5. References

- [1] M. Bielawski, M. Zhu, B. Olofsson, *Adv. Synth. Catal.* 2006, **349**, 2610.
- [2] M. Bielawski, D. Aili, B. Olofsson, *J. Org. Chem.* 2008, **73**, 4602.
- [3] H. Kaneko, T. Ikawa, Y. Yamamoto, S. Arulmozhiraja, H. Tokiwa, S. Akai, *Synlett.* 2018, **29**, 943.

## 6. $^1\text{H}$ and $^{13}\text{C}$ Spectra of New Compounds

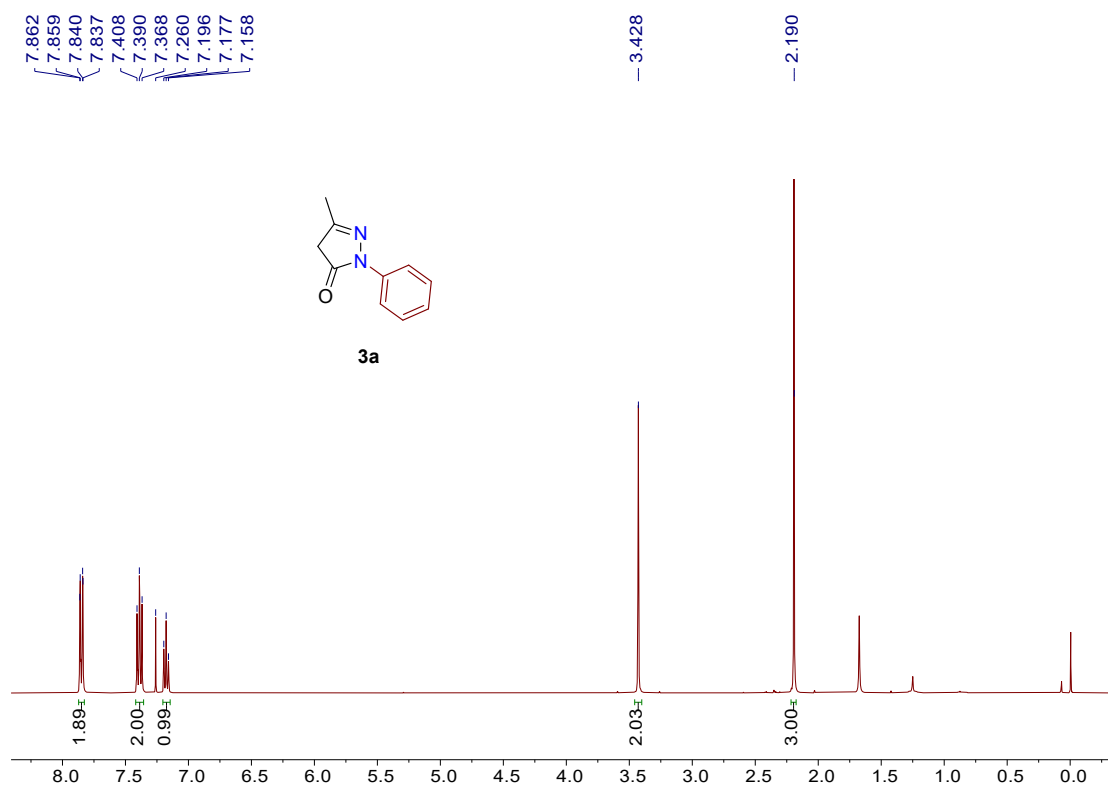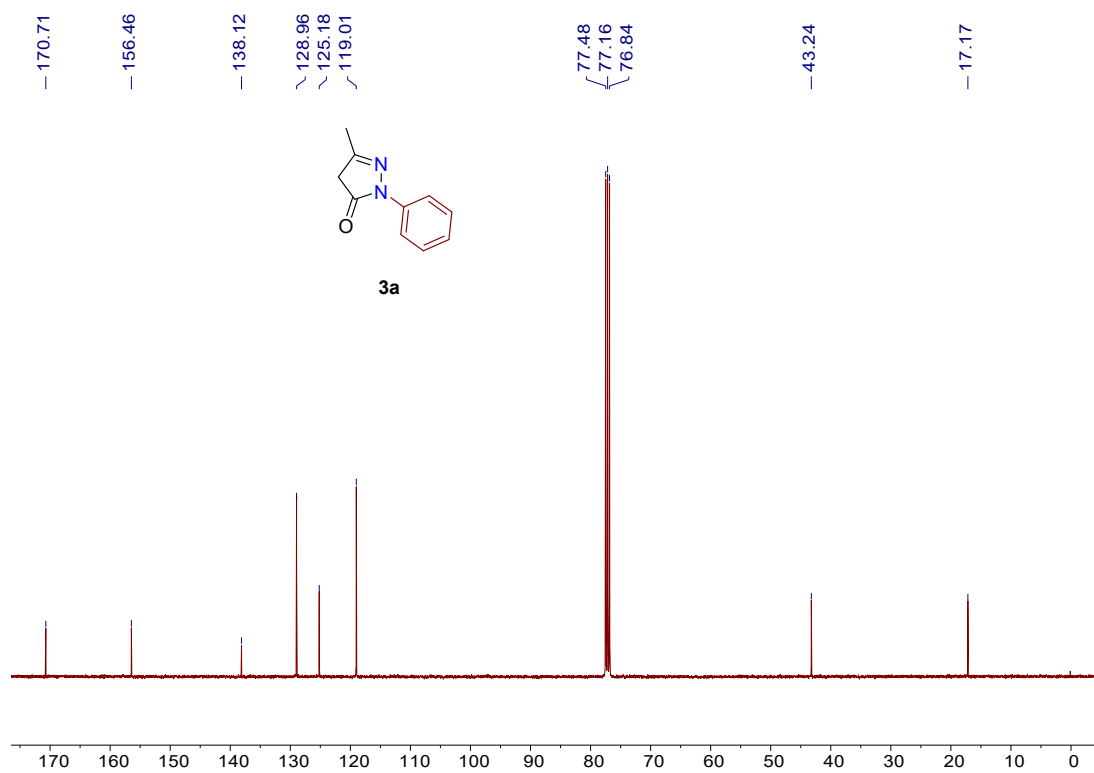

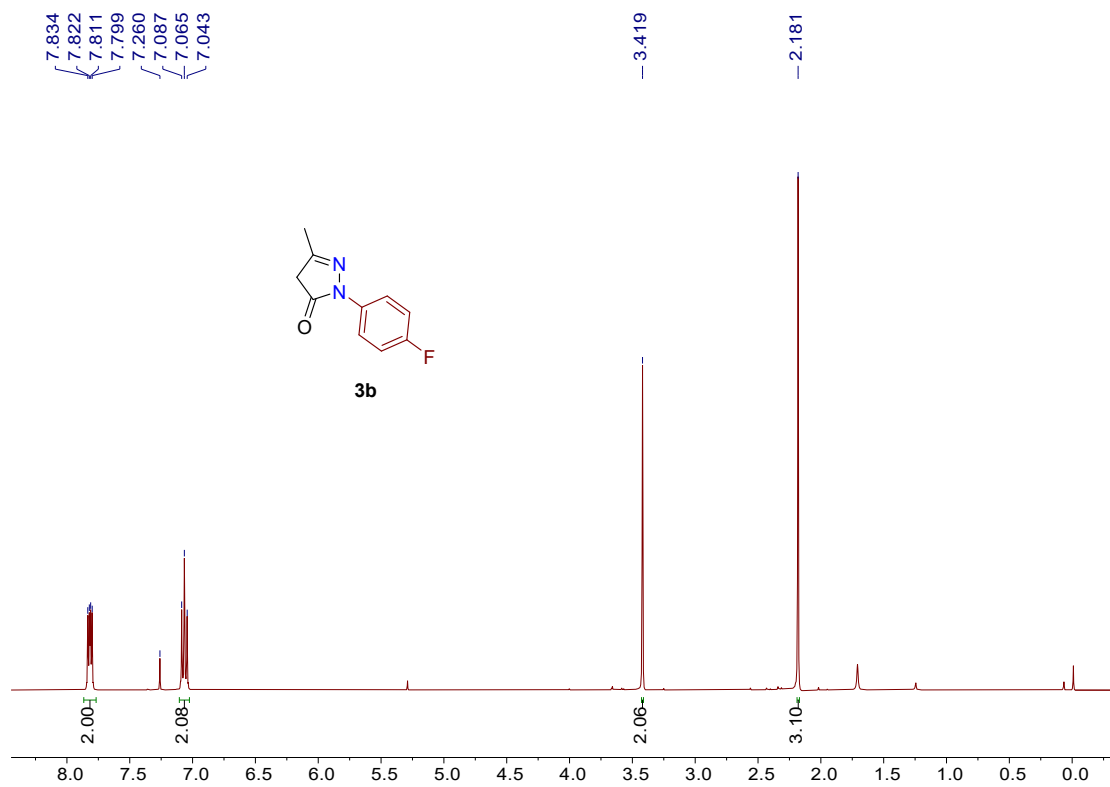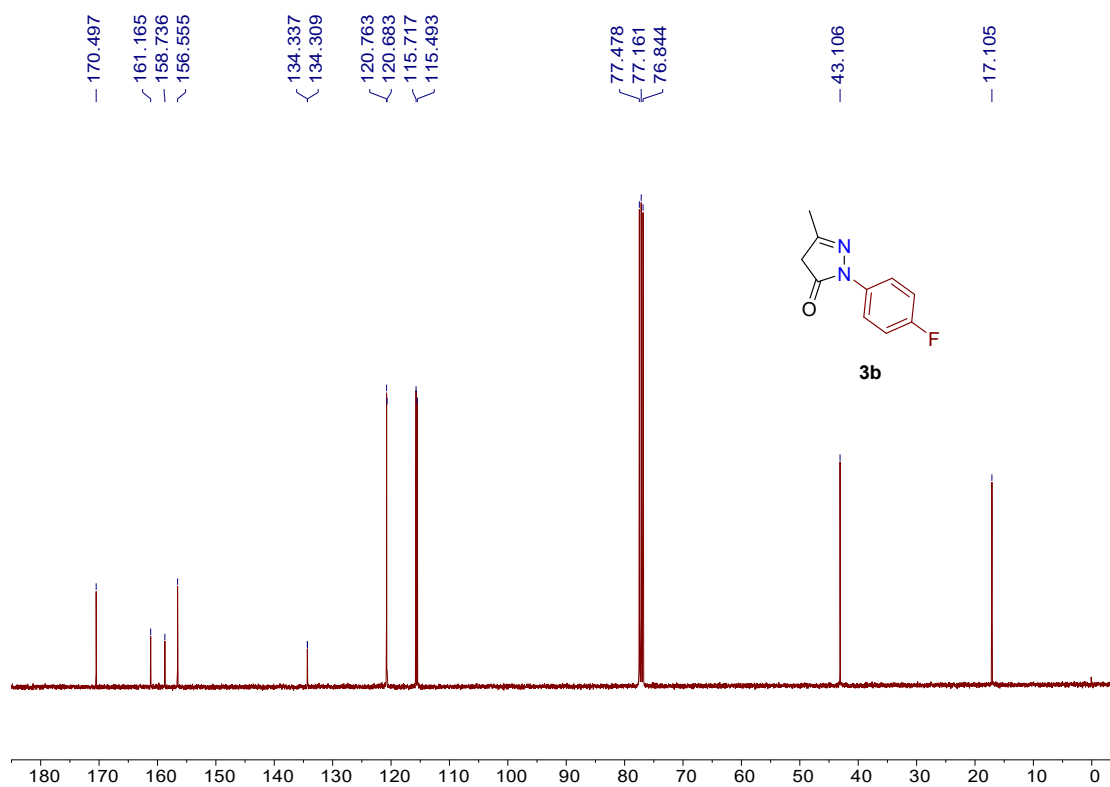

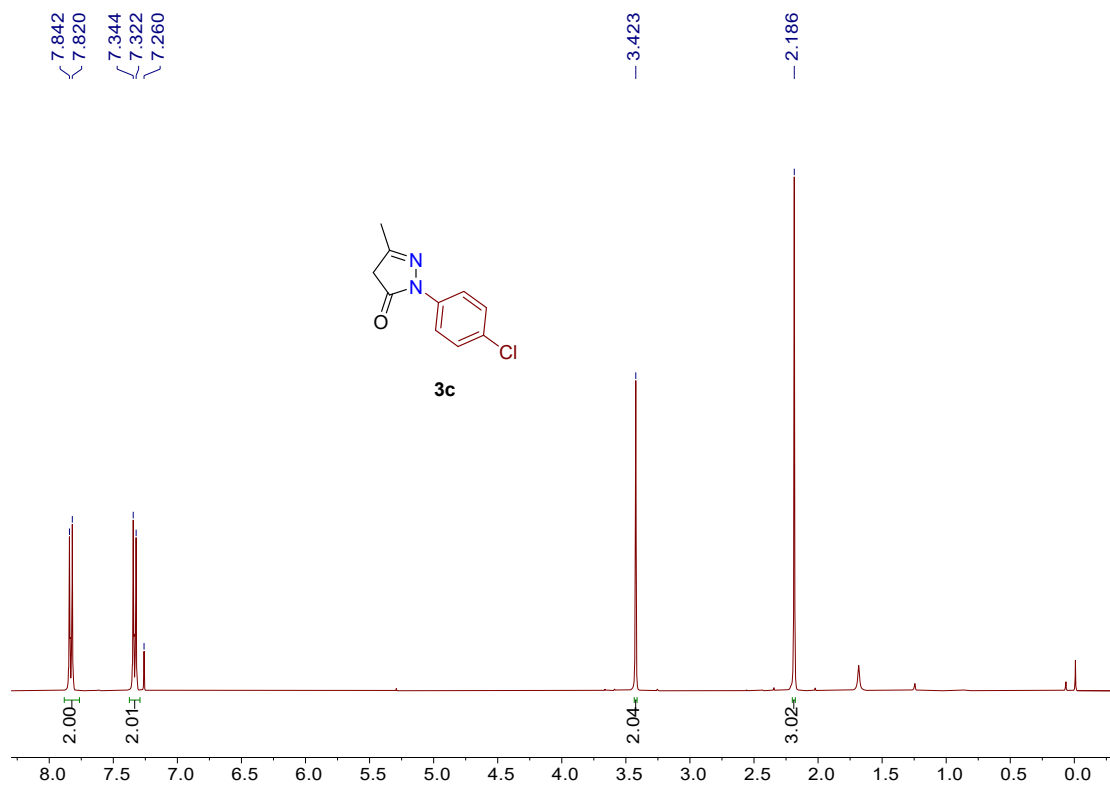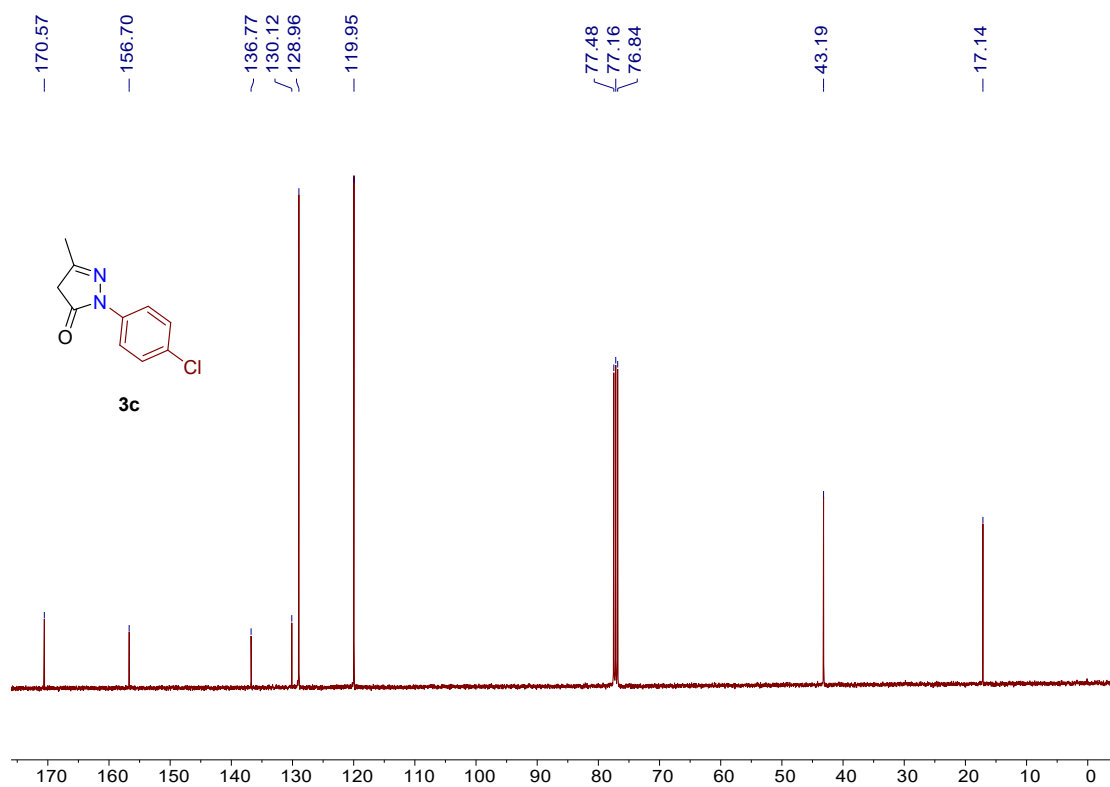



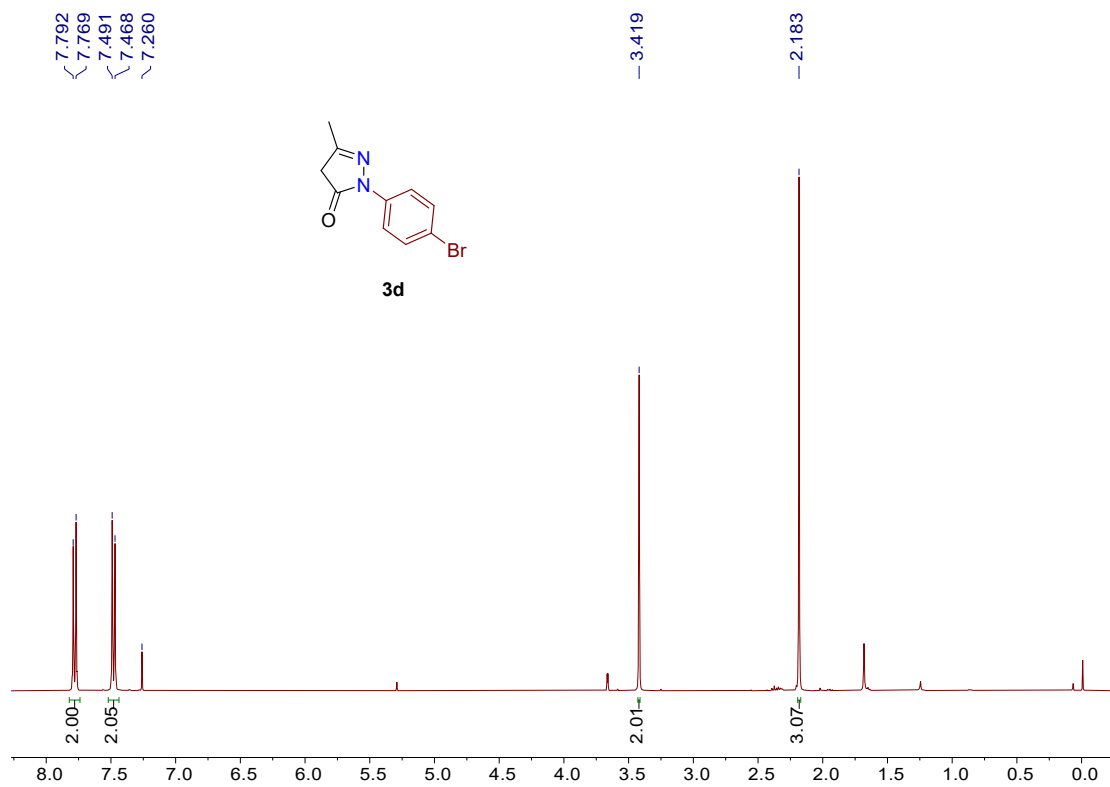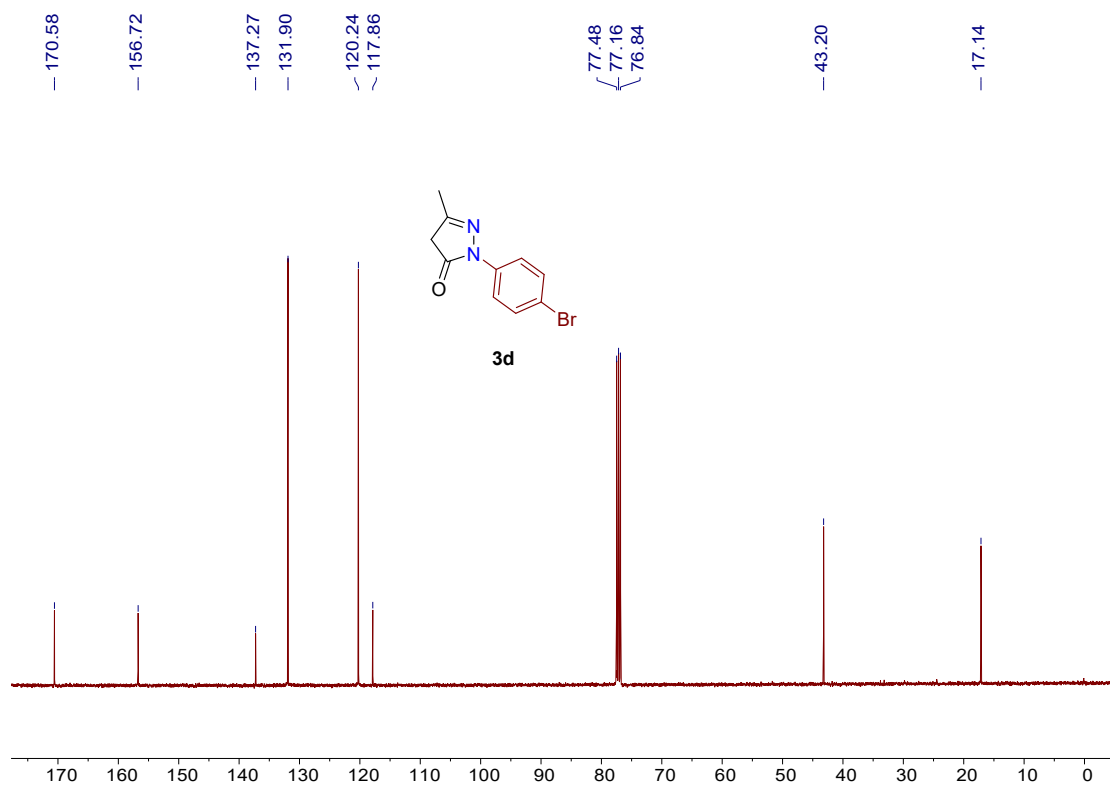

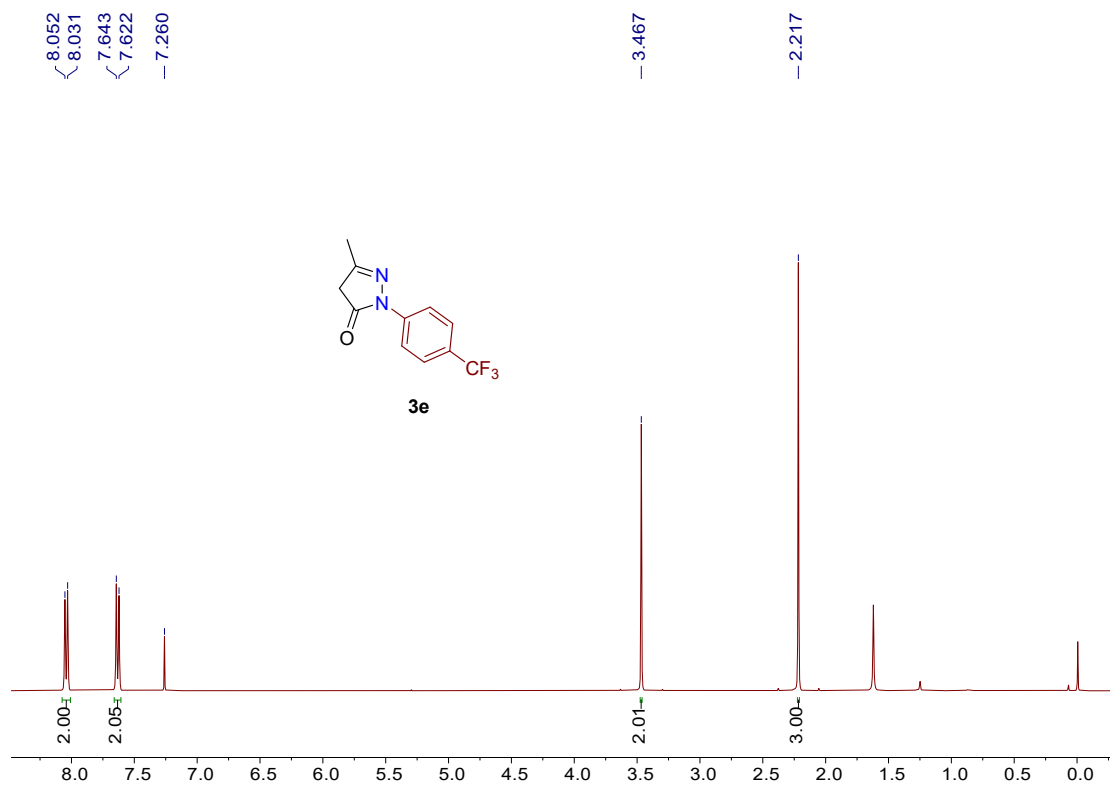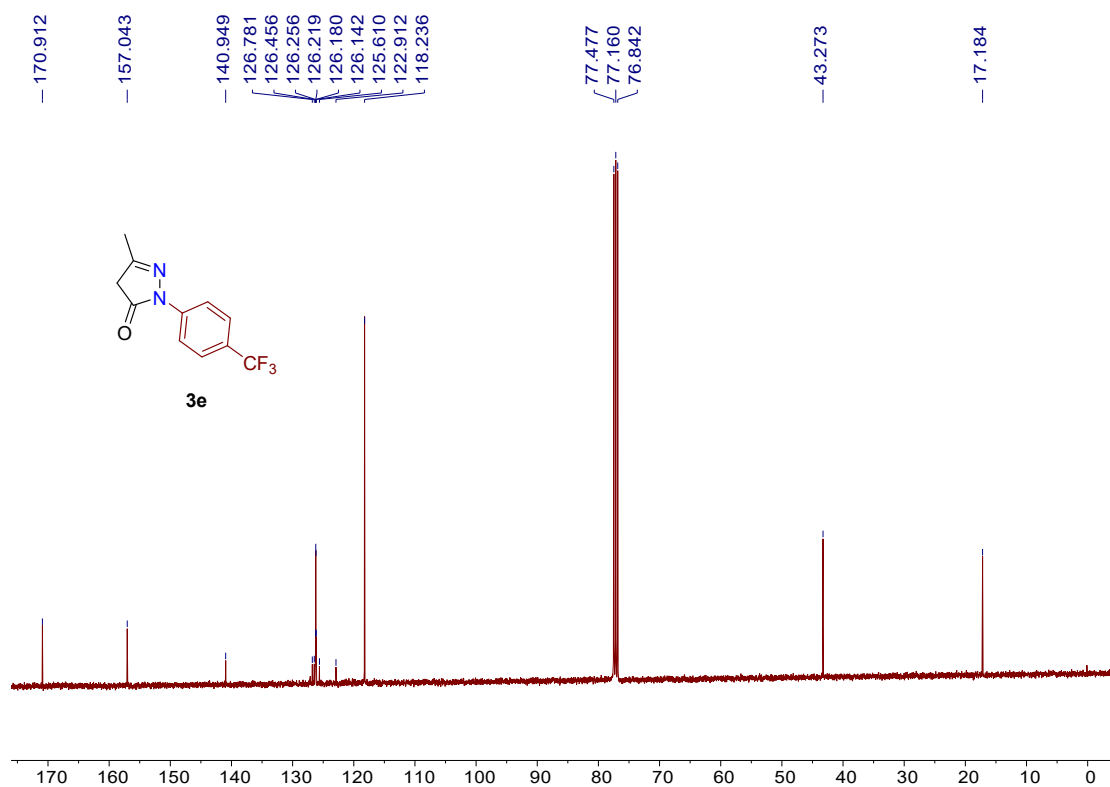

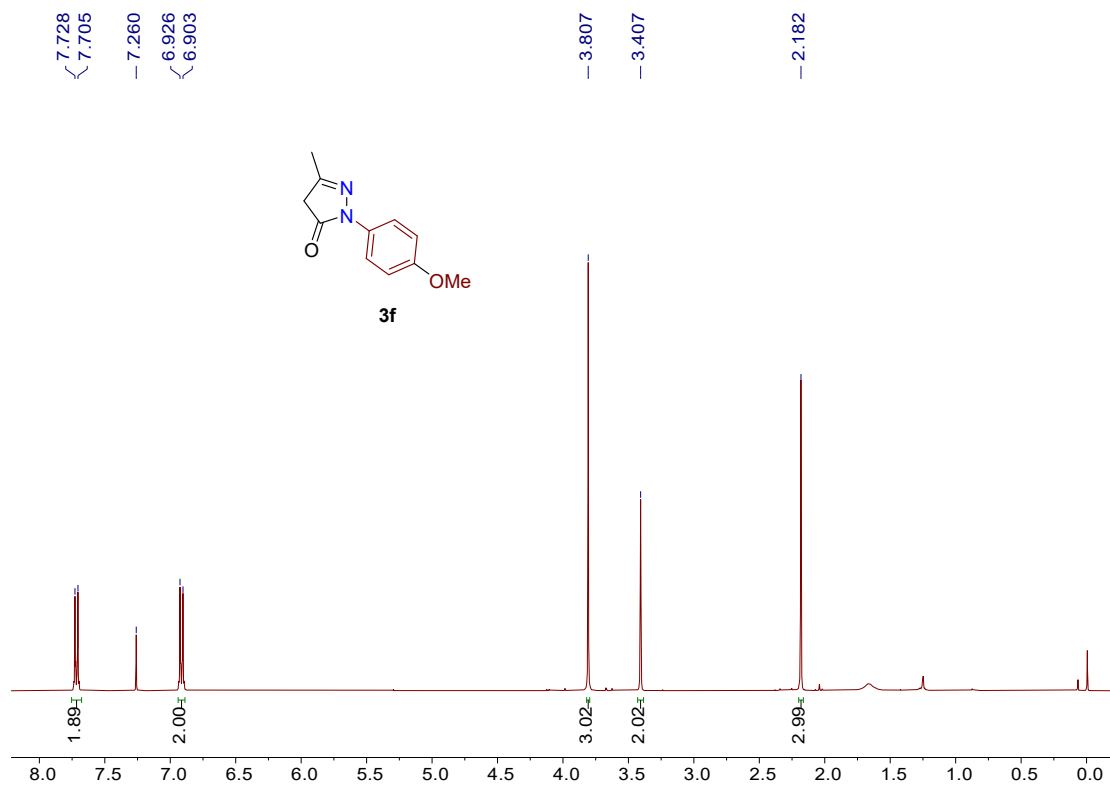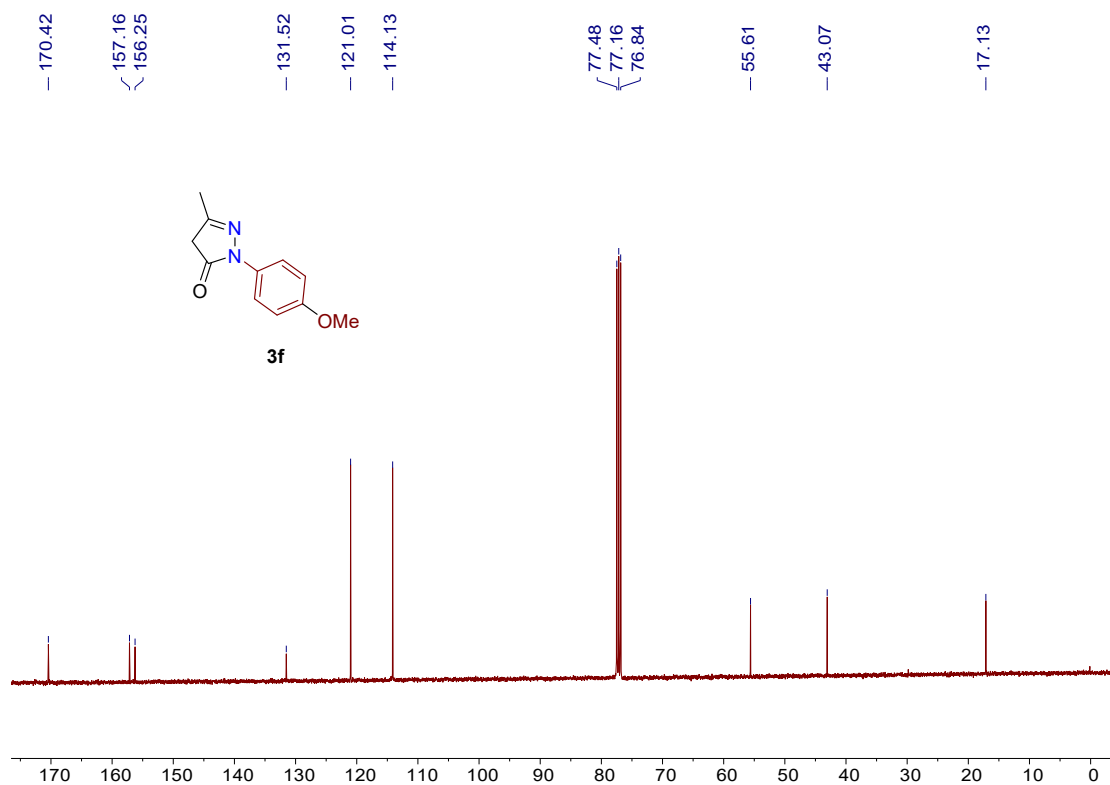

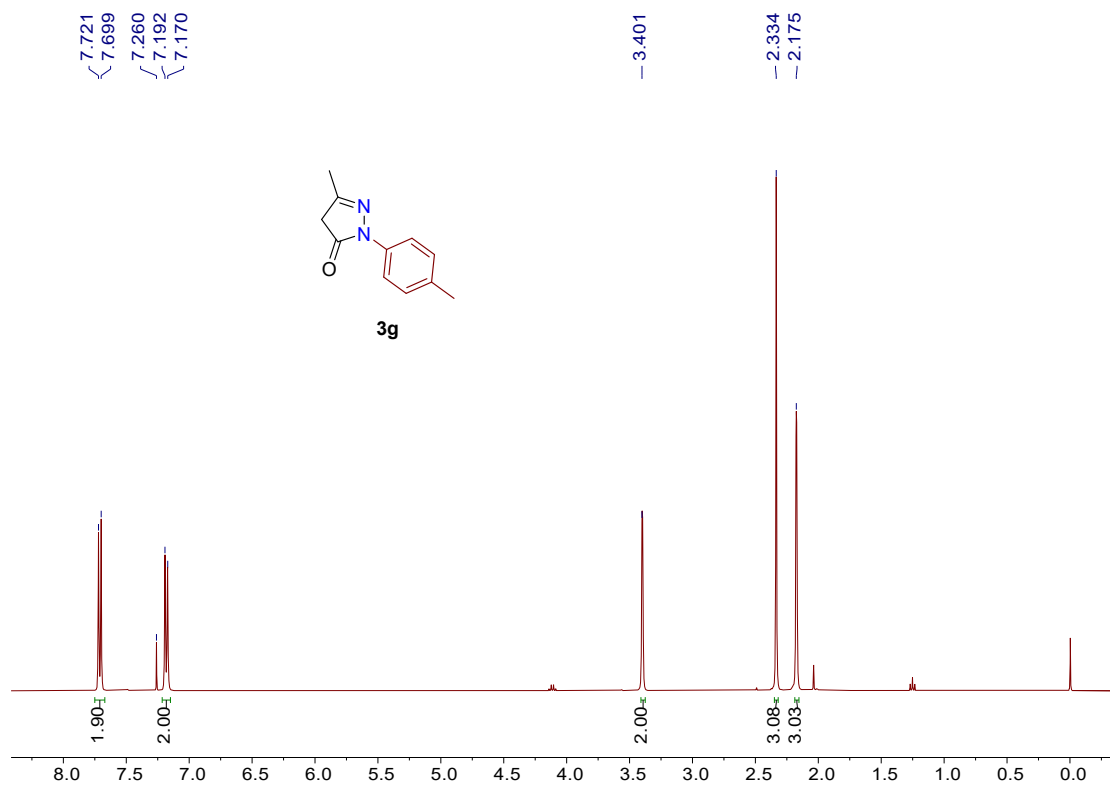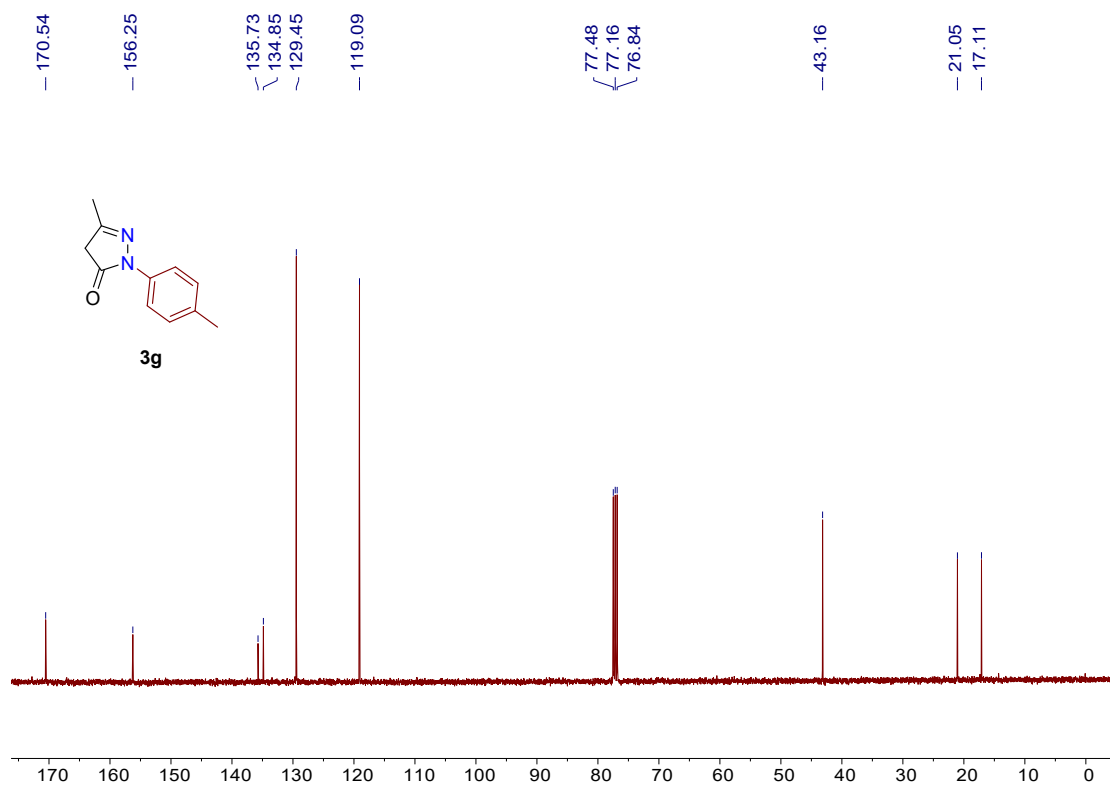

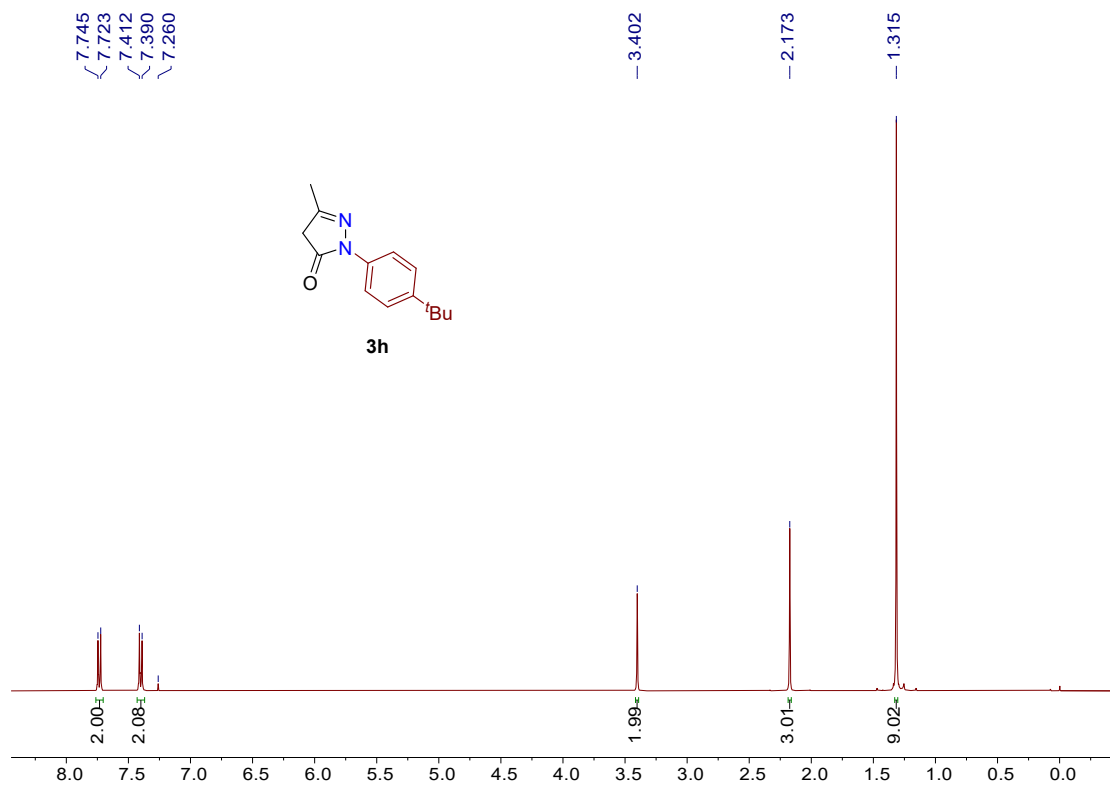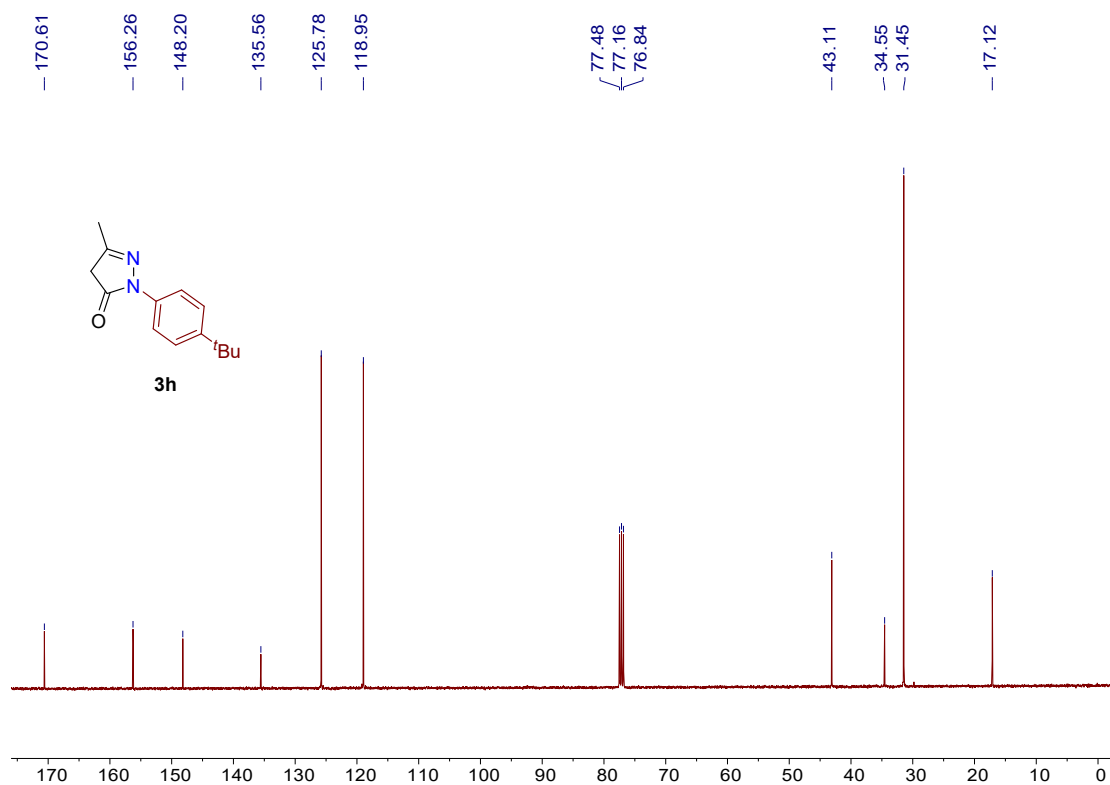

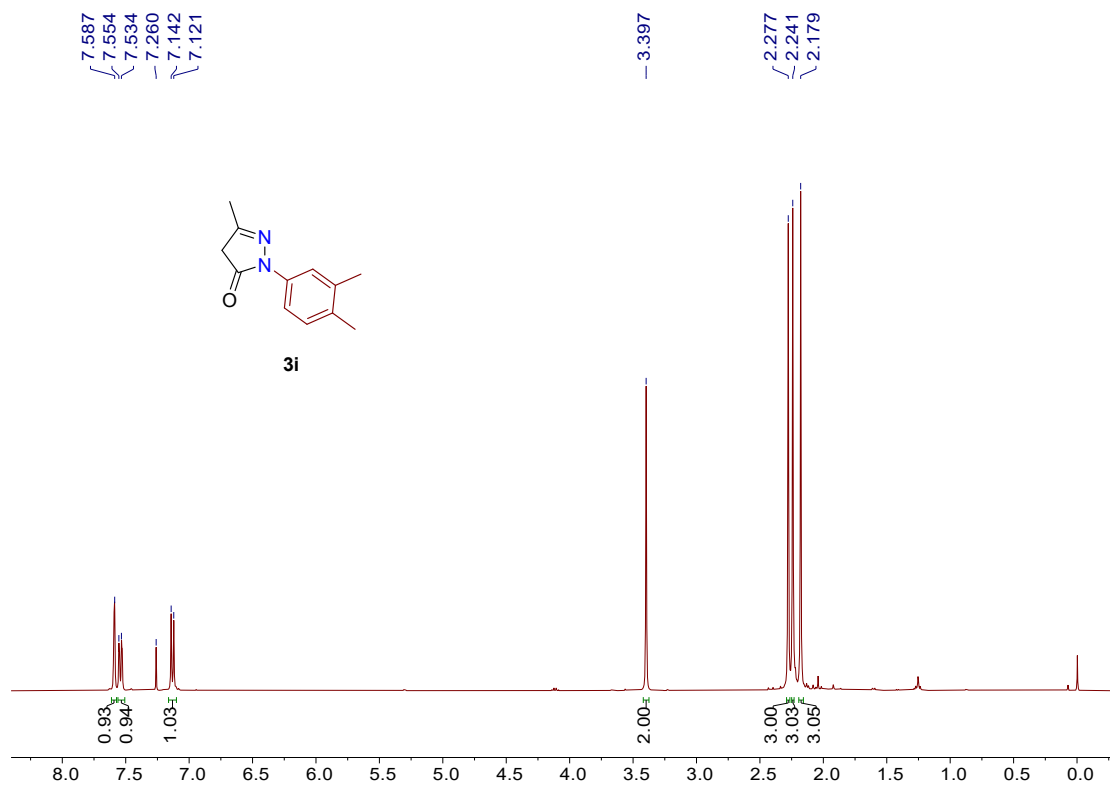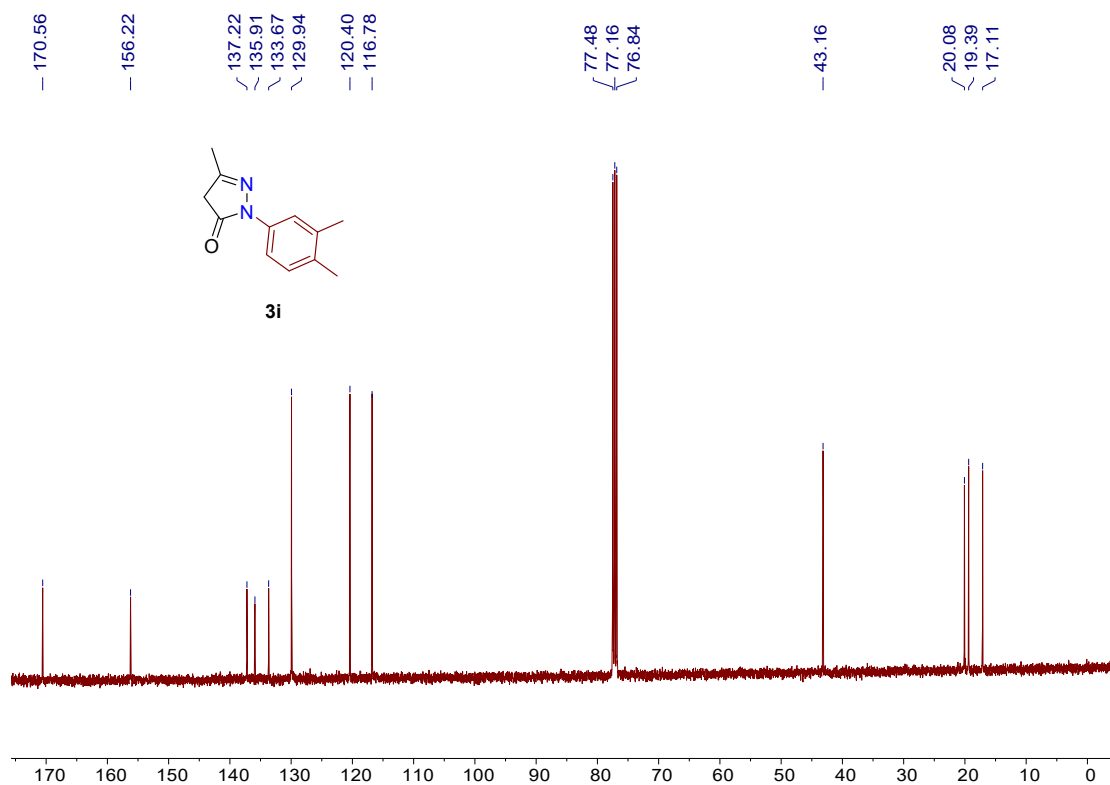

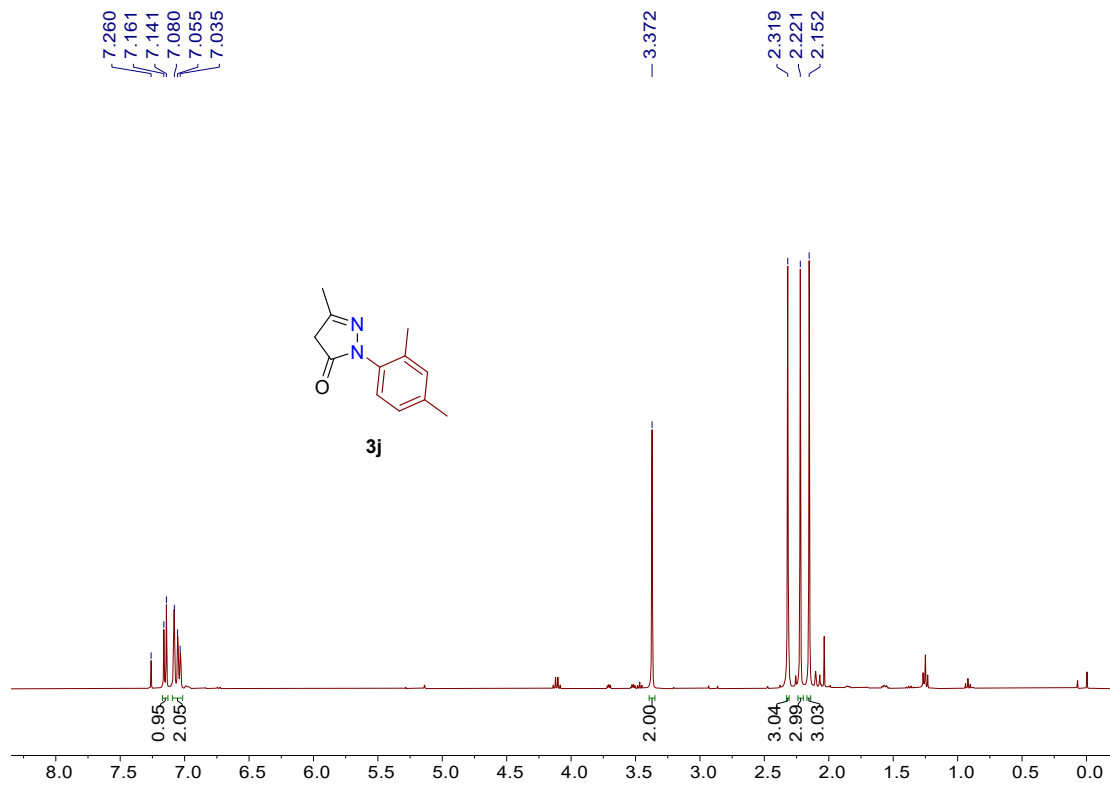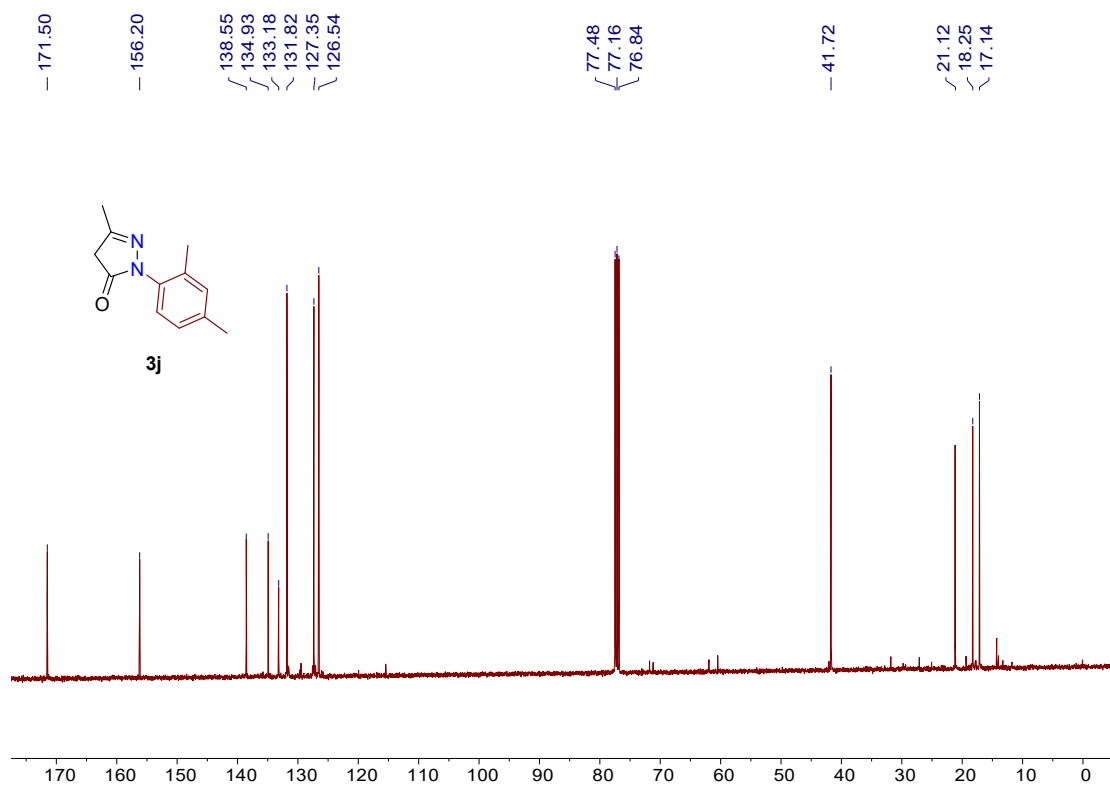

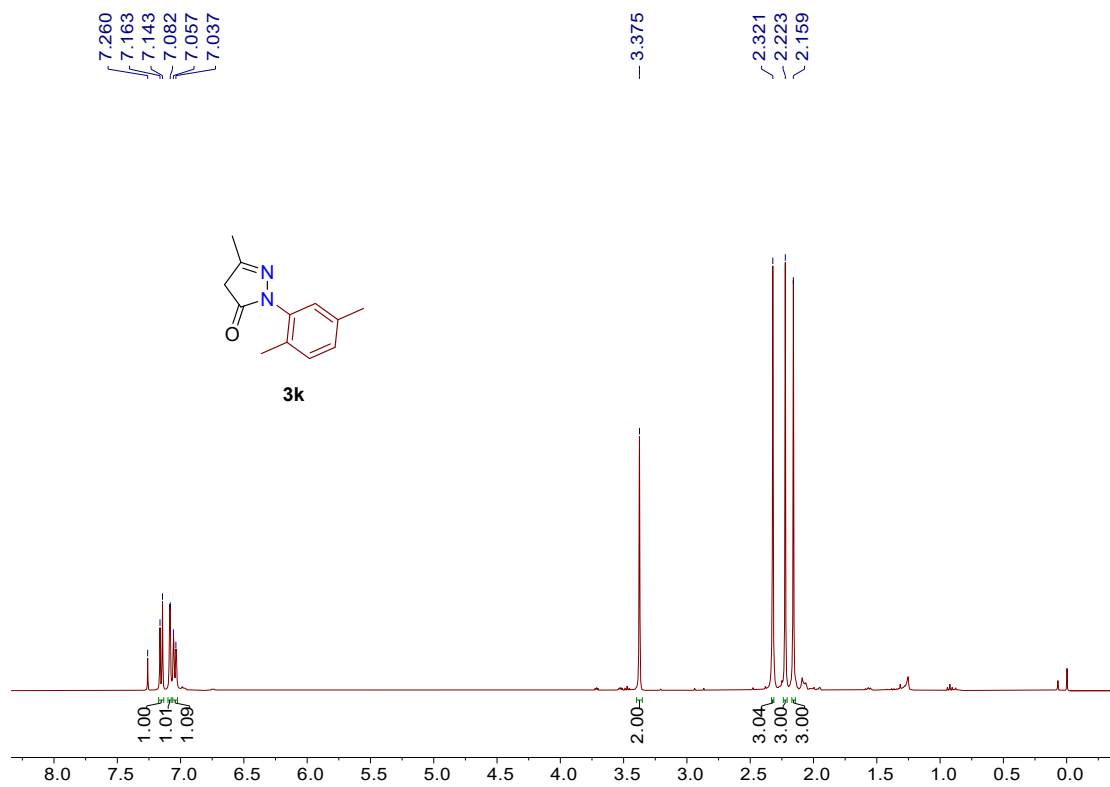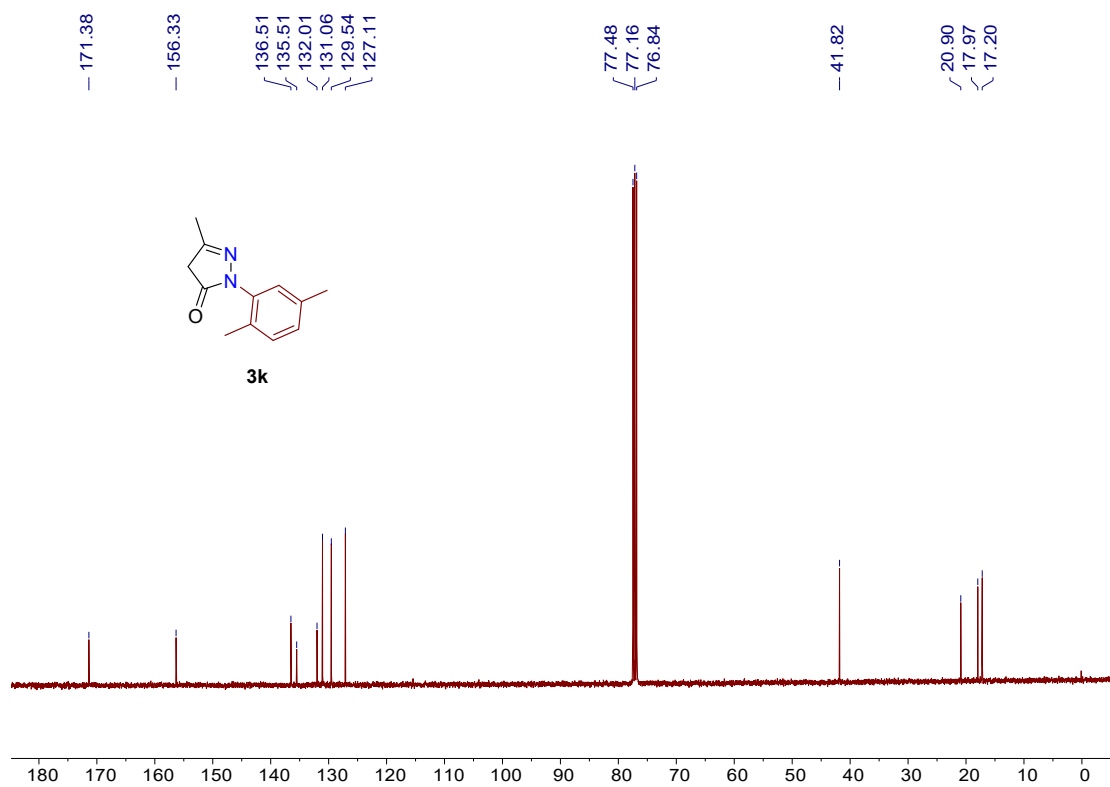



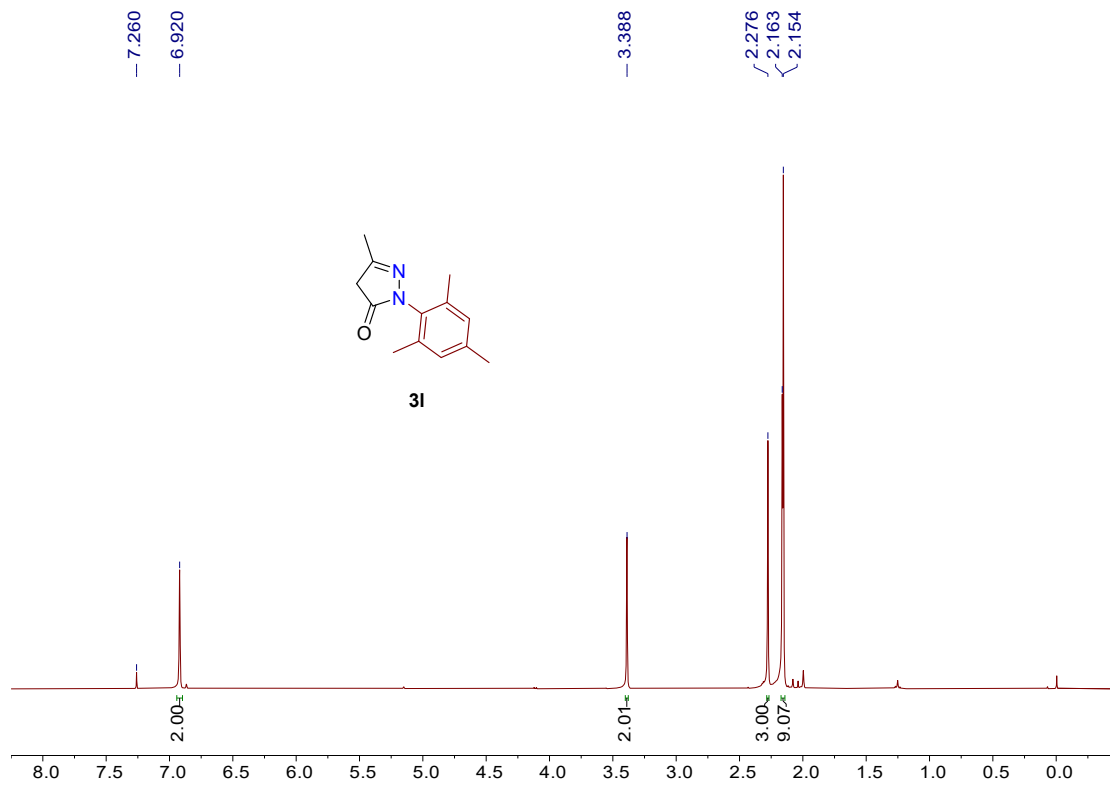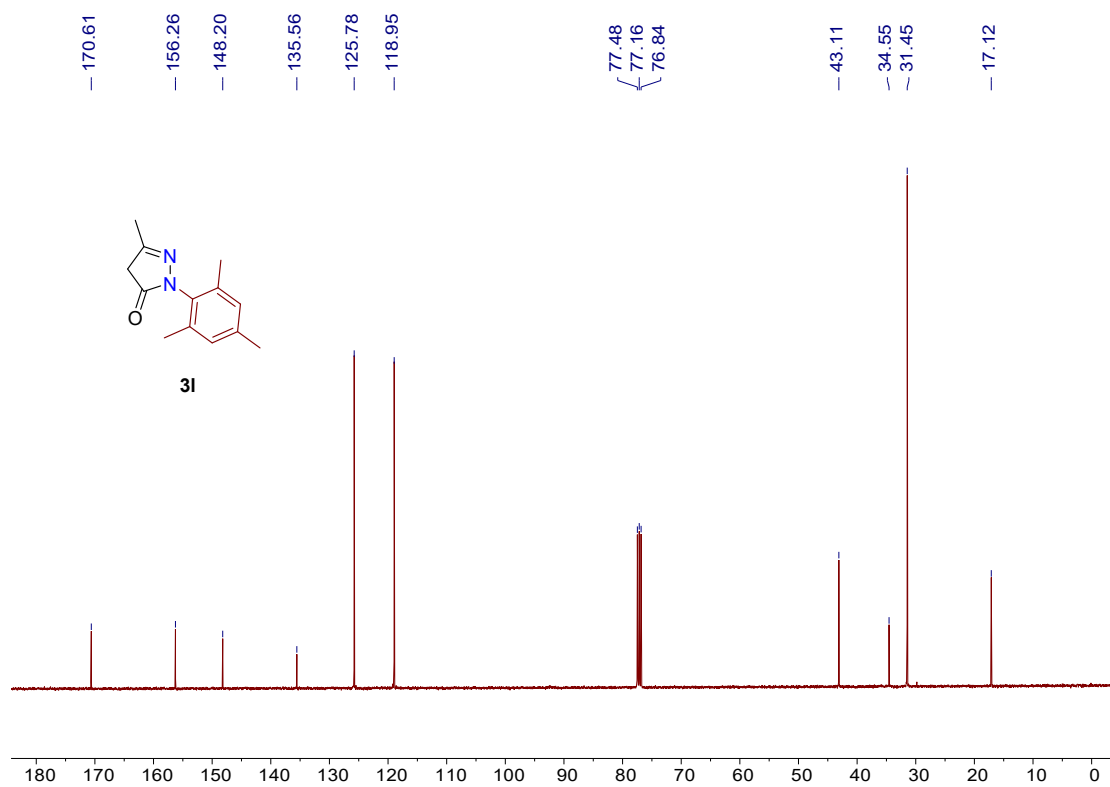

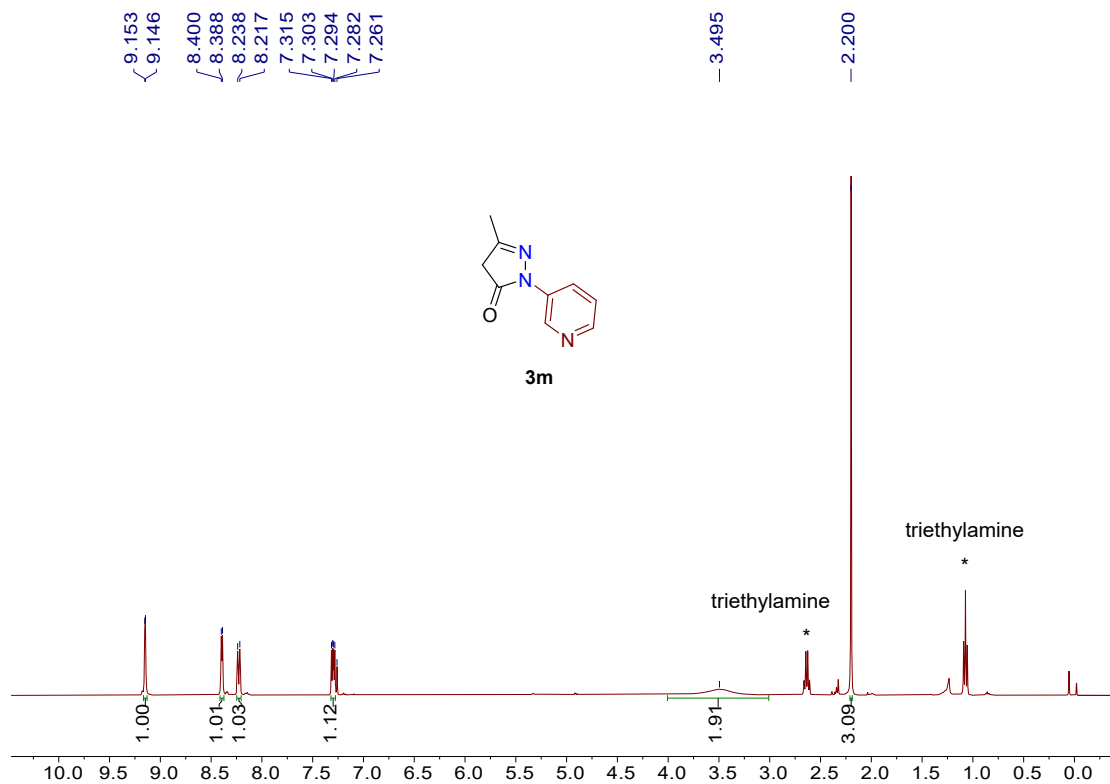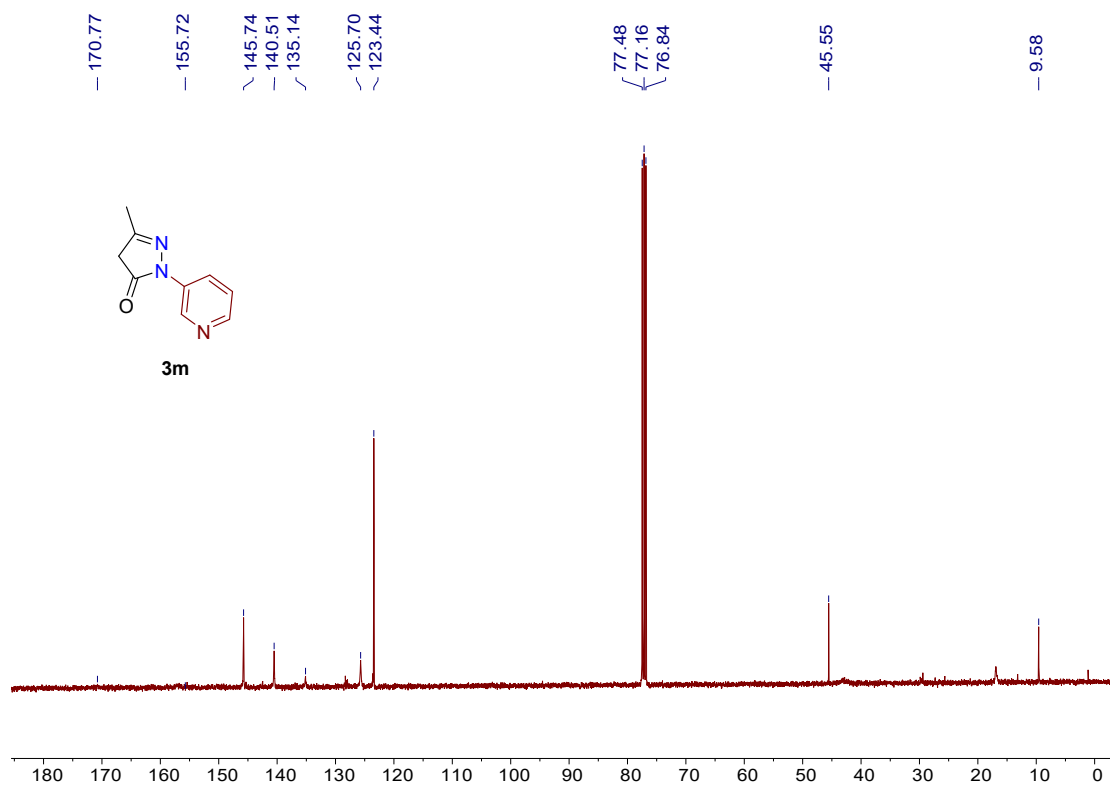

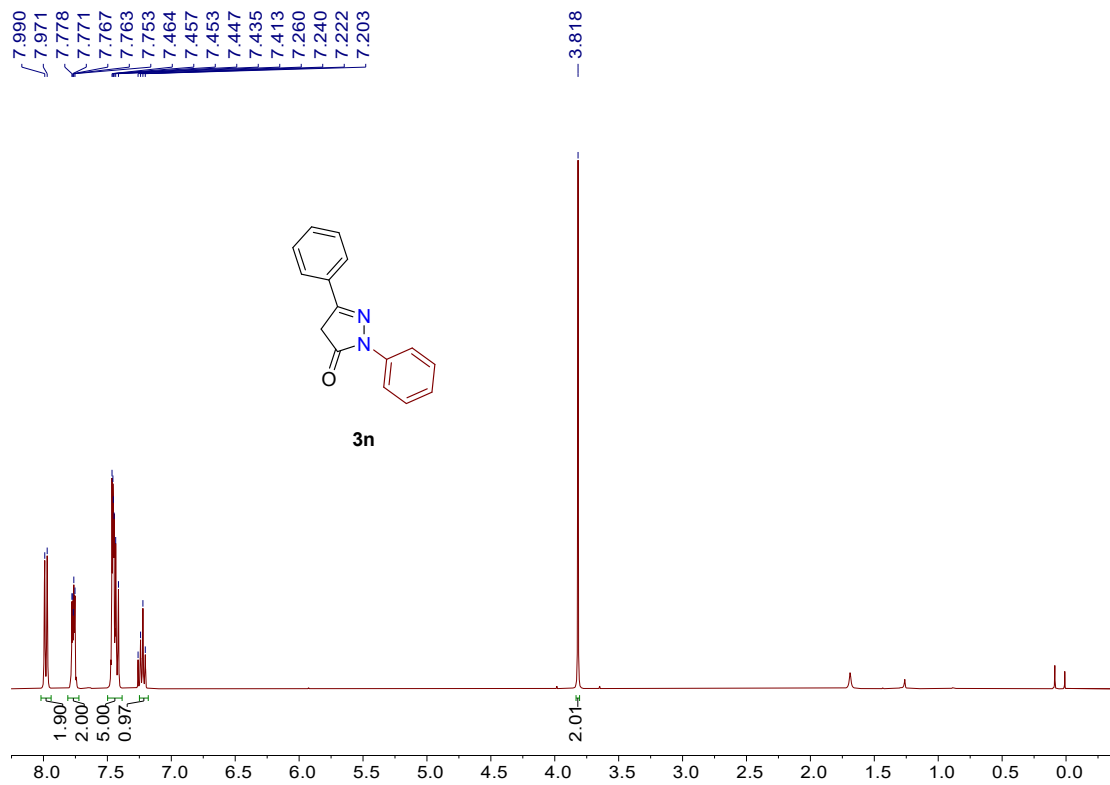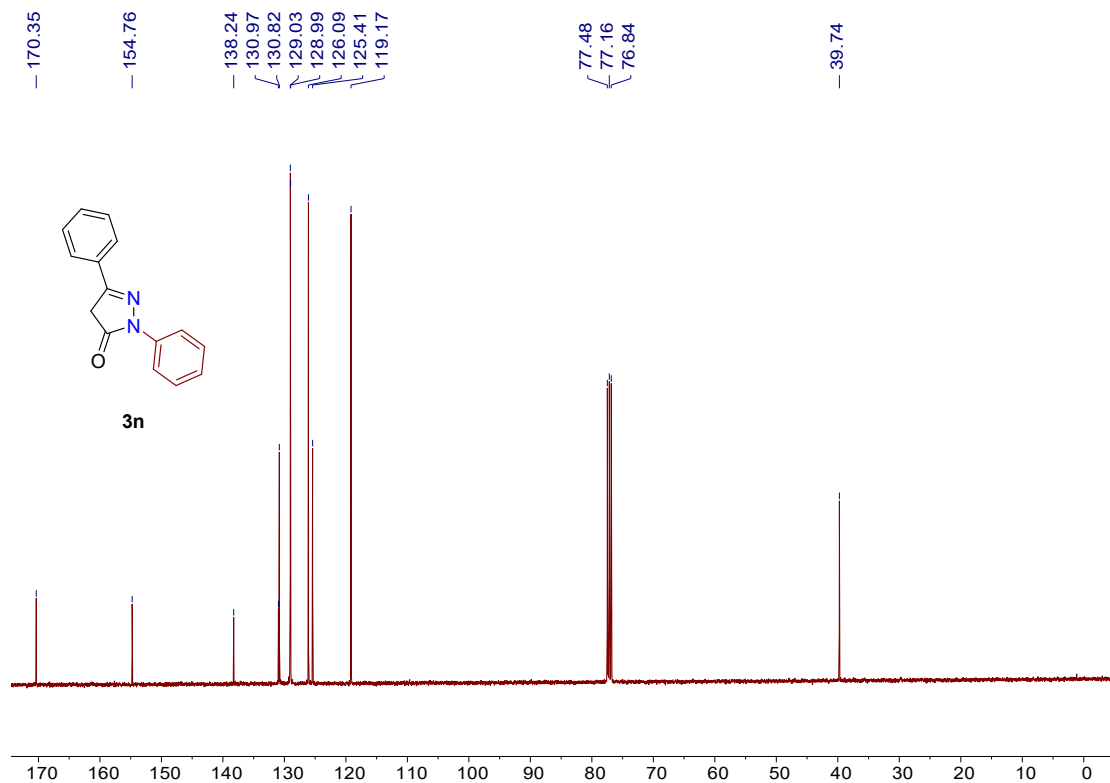

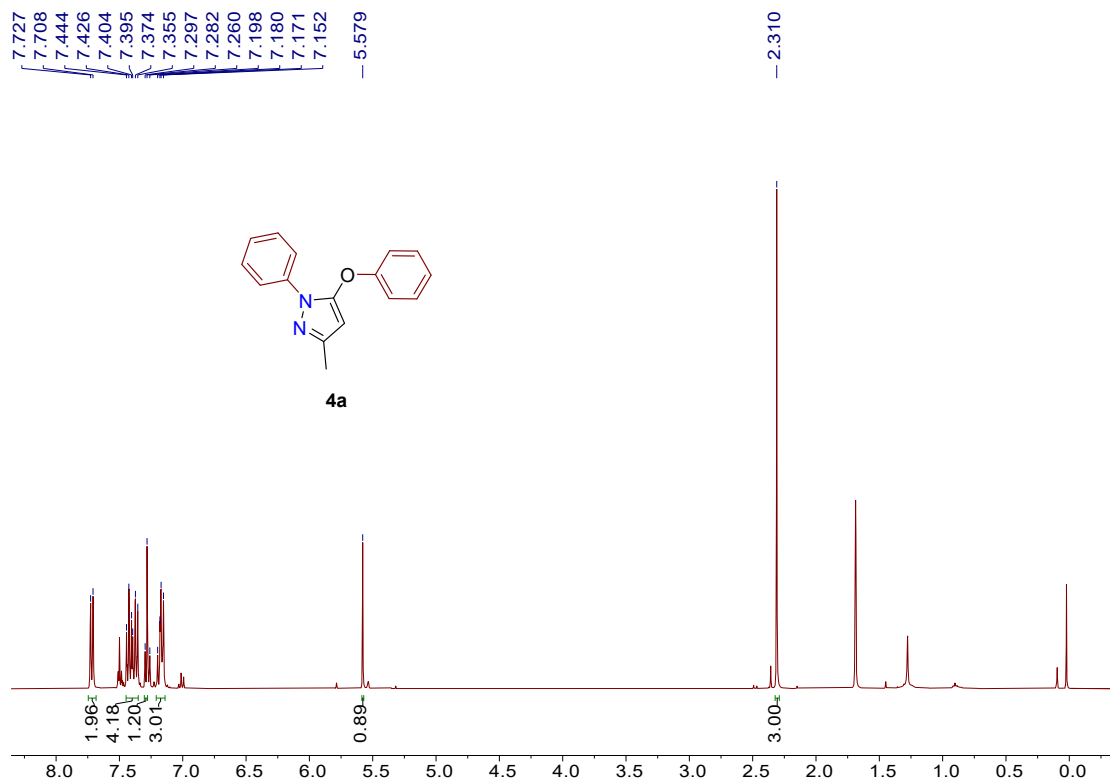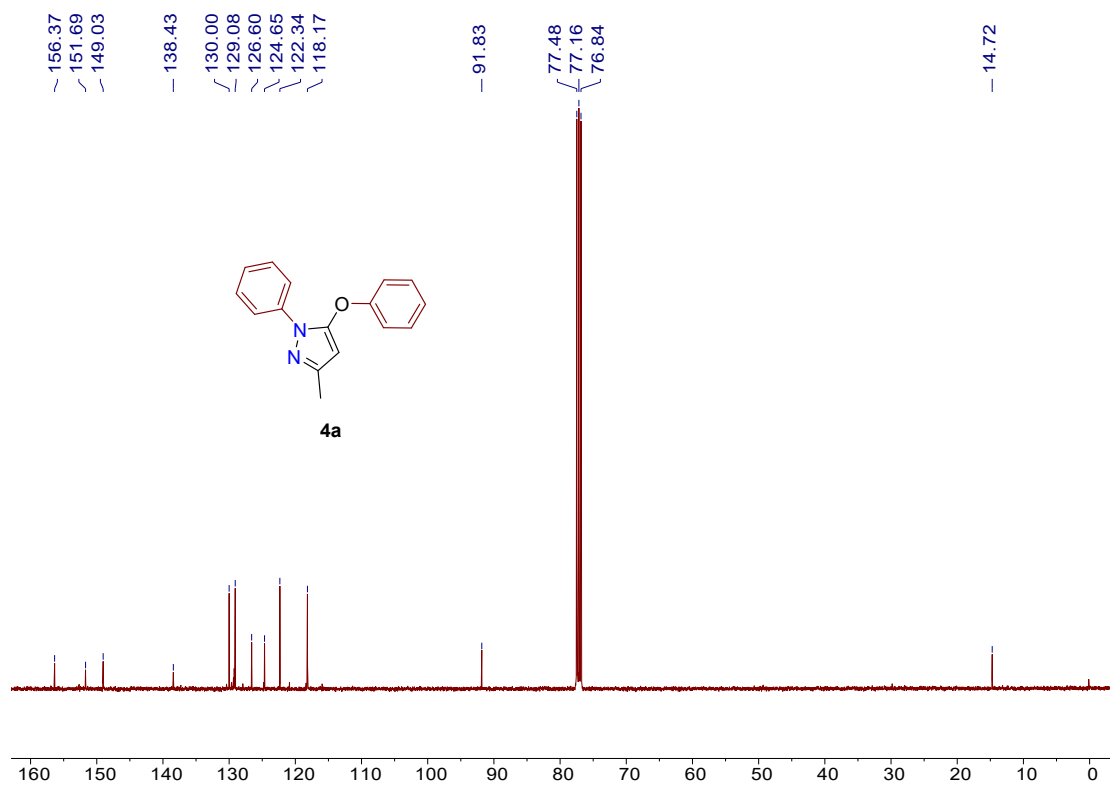

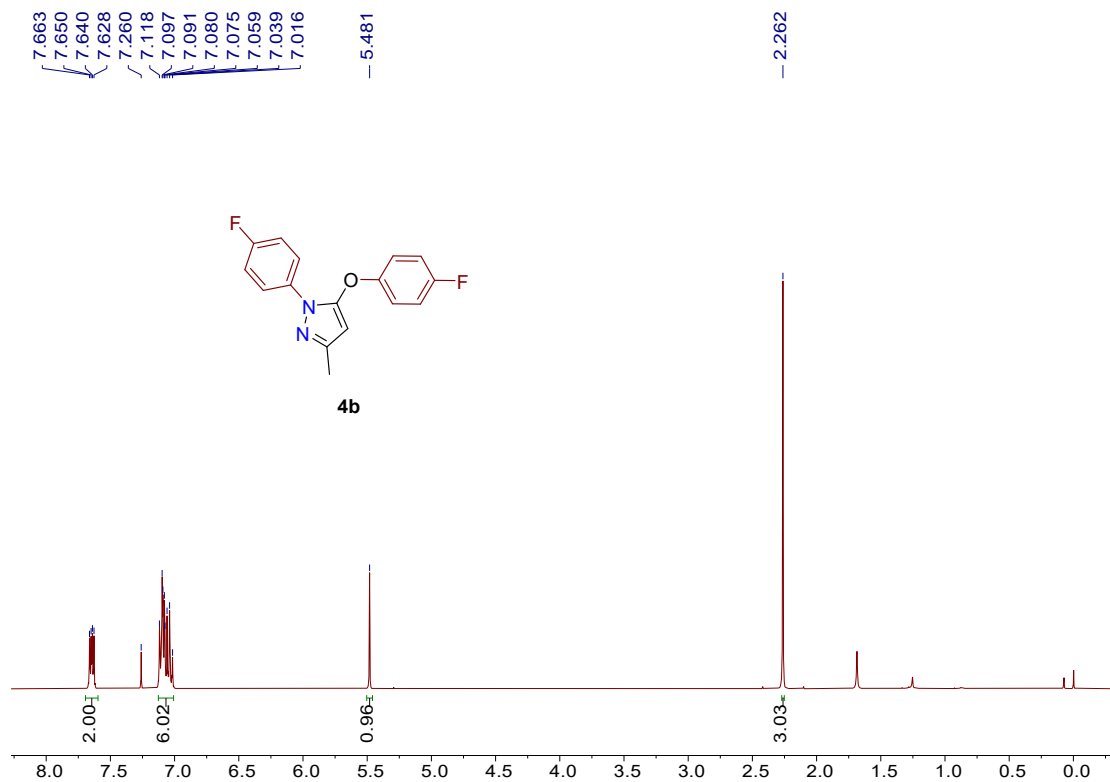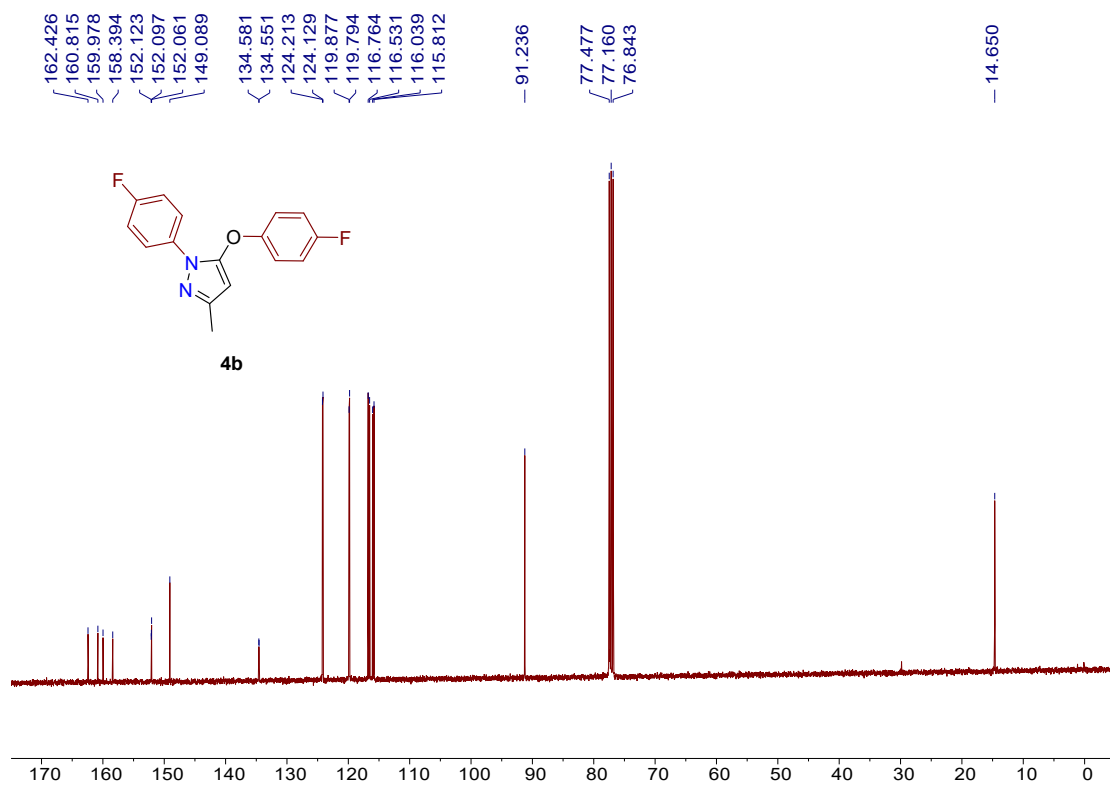

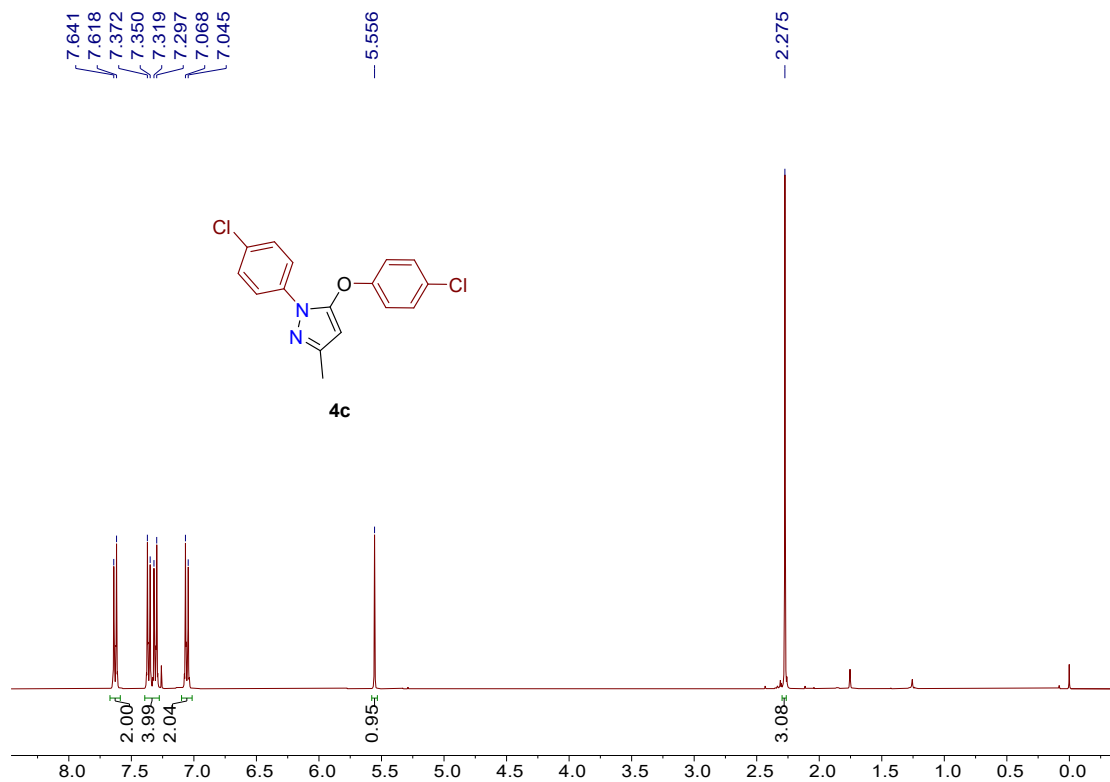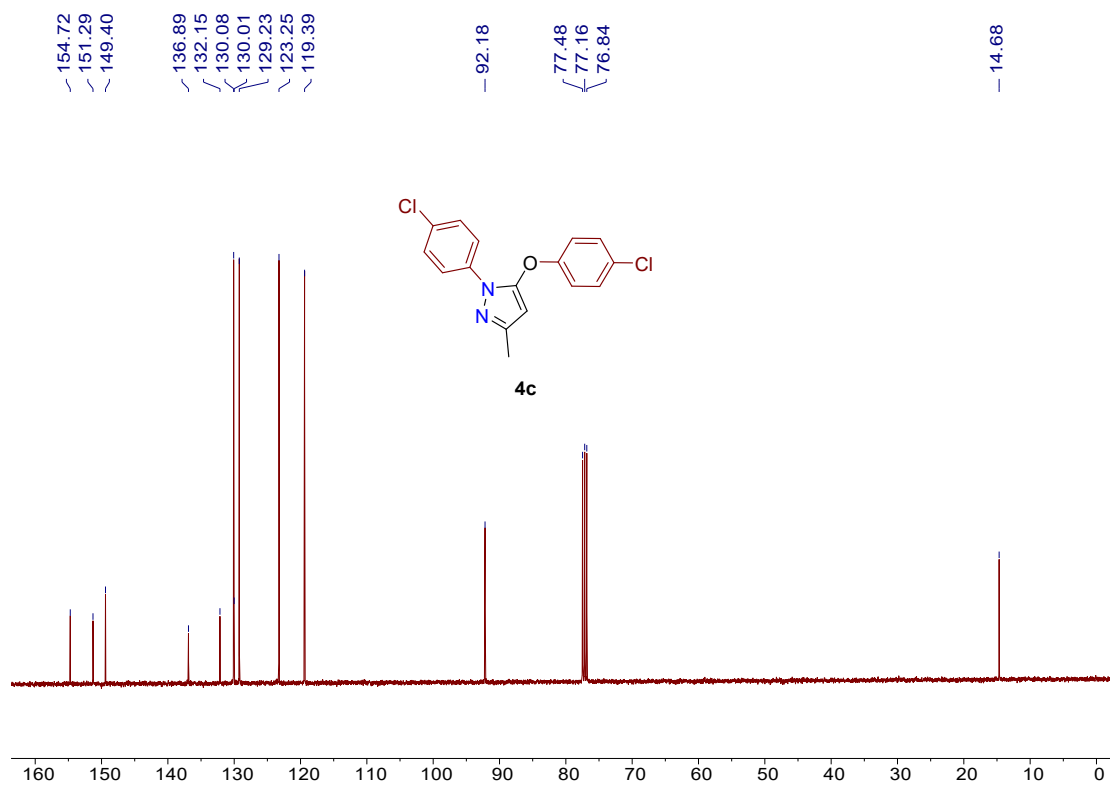

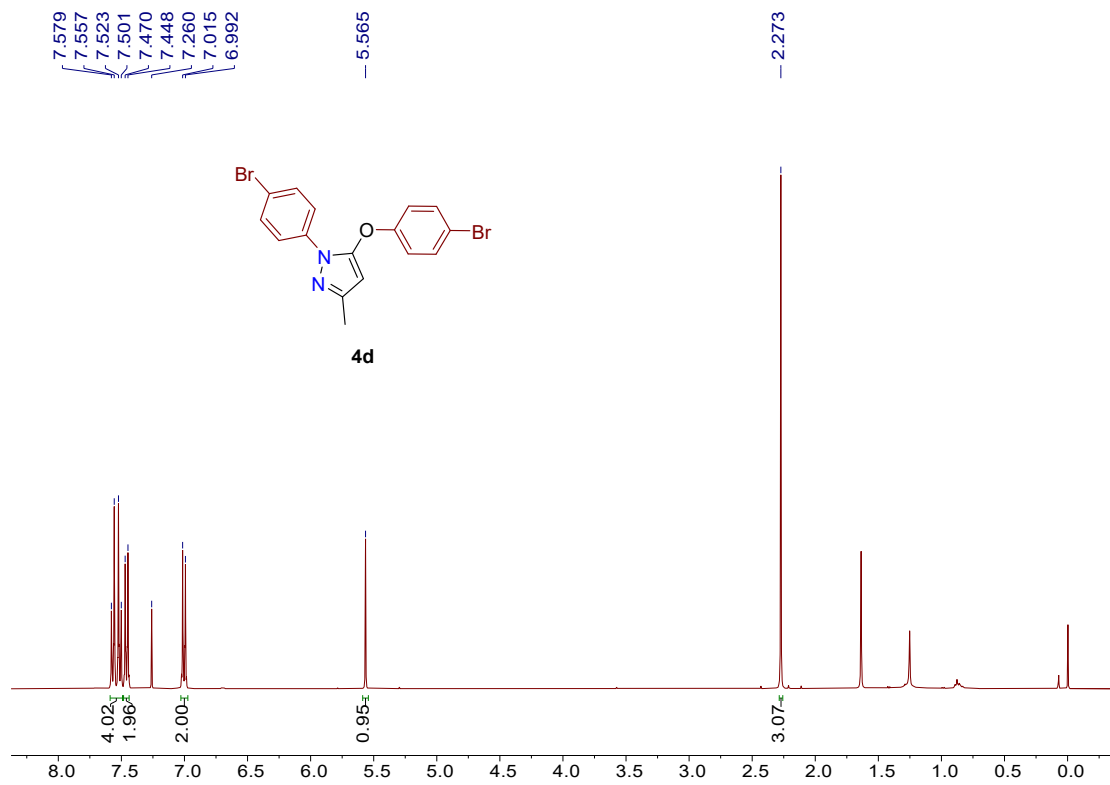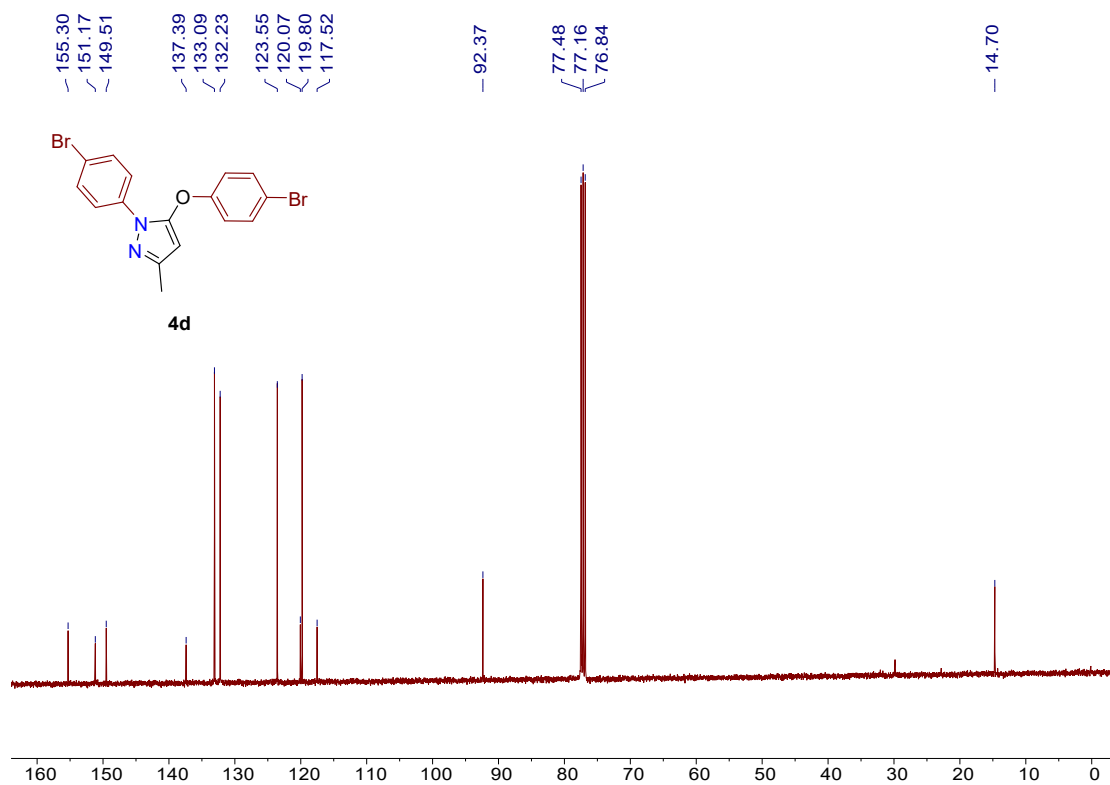

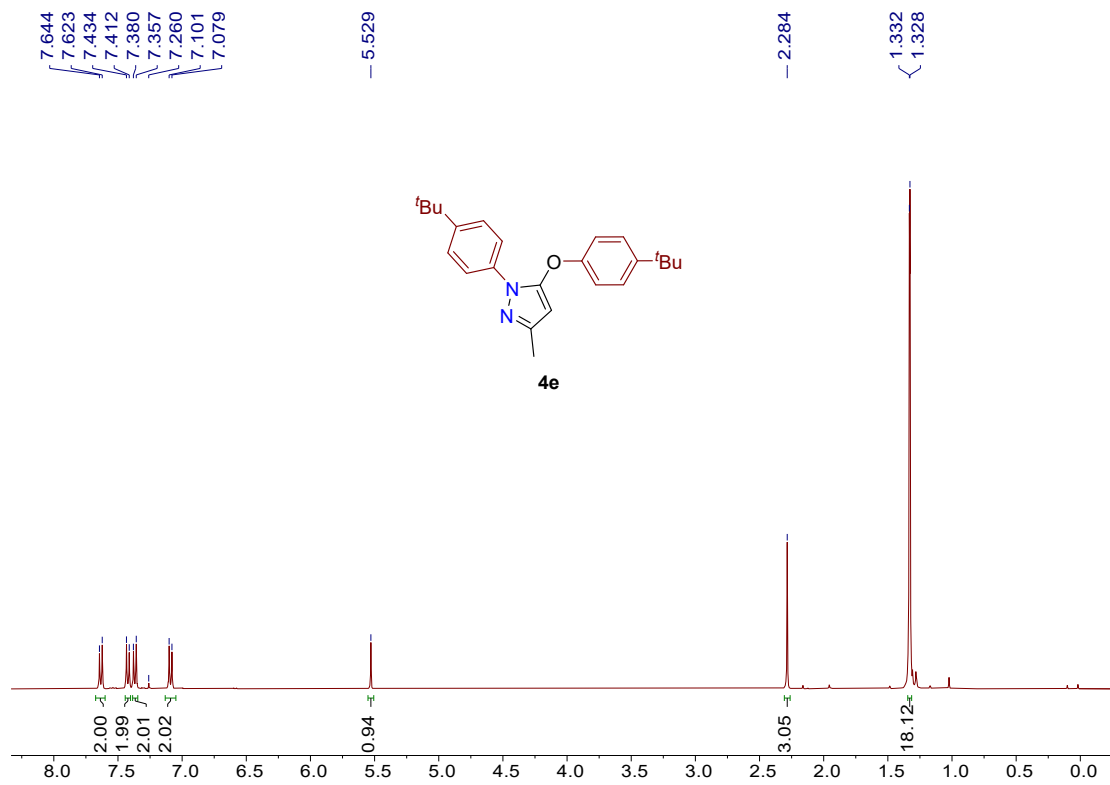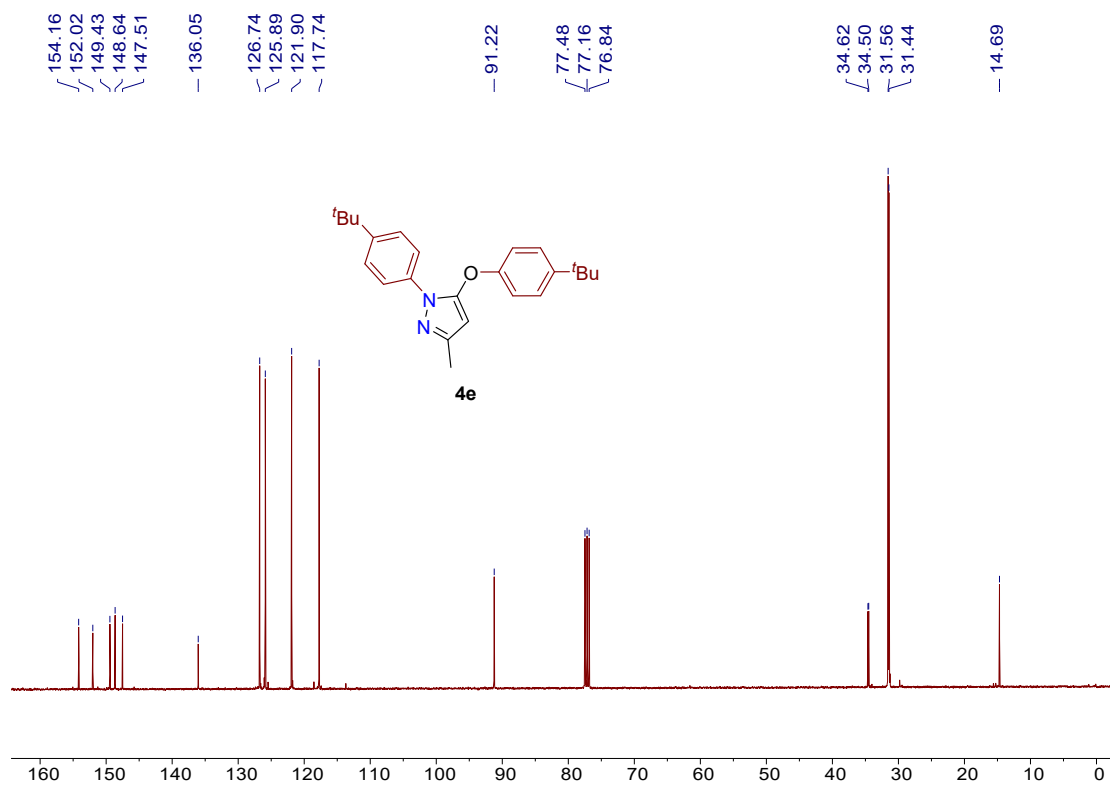



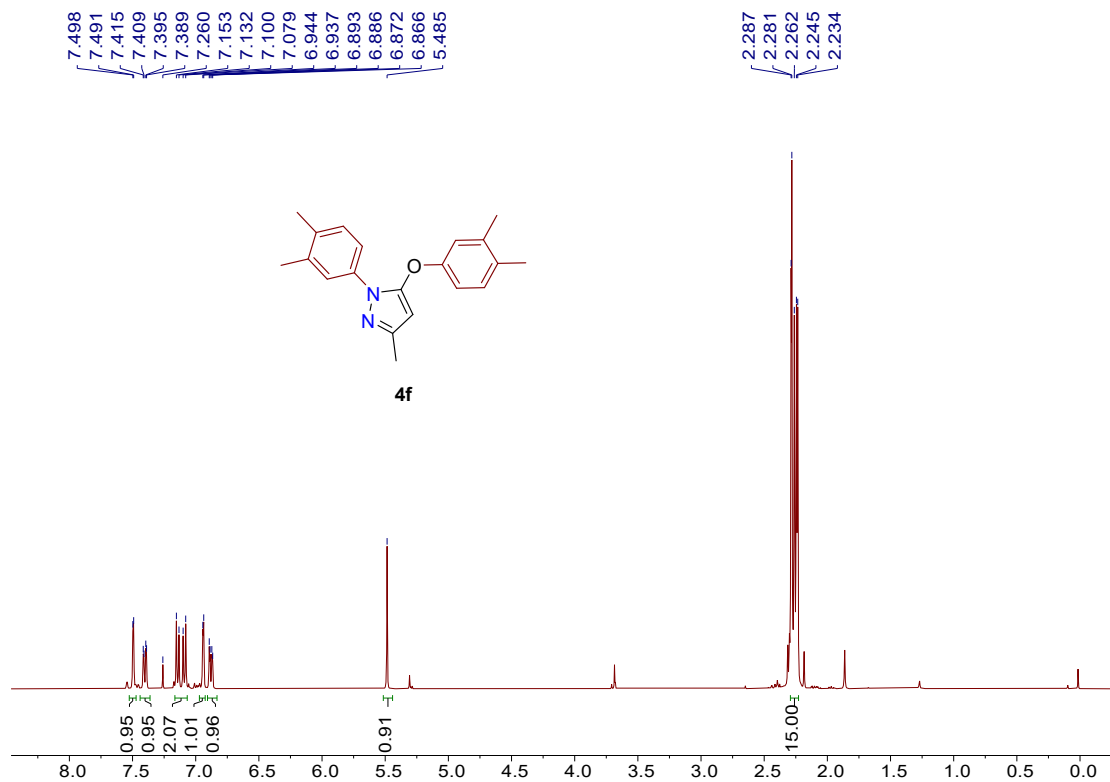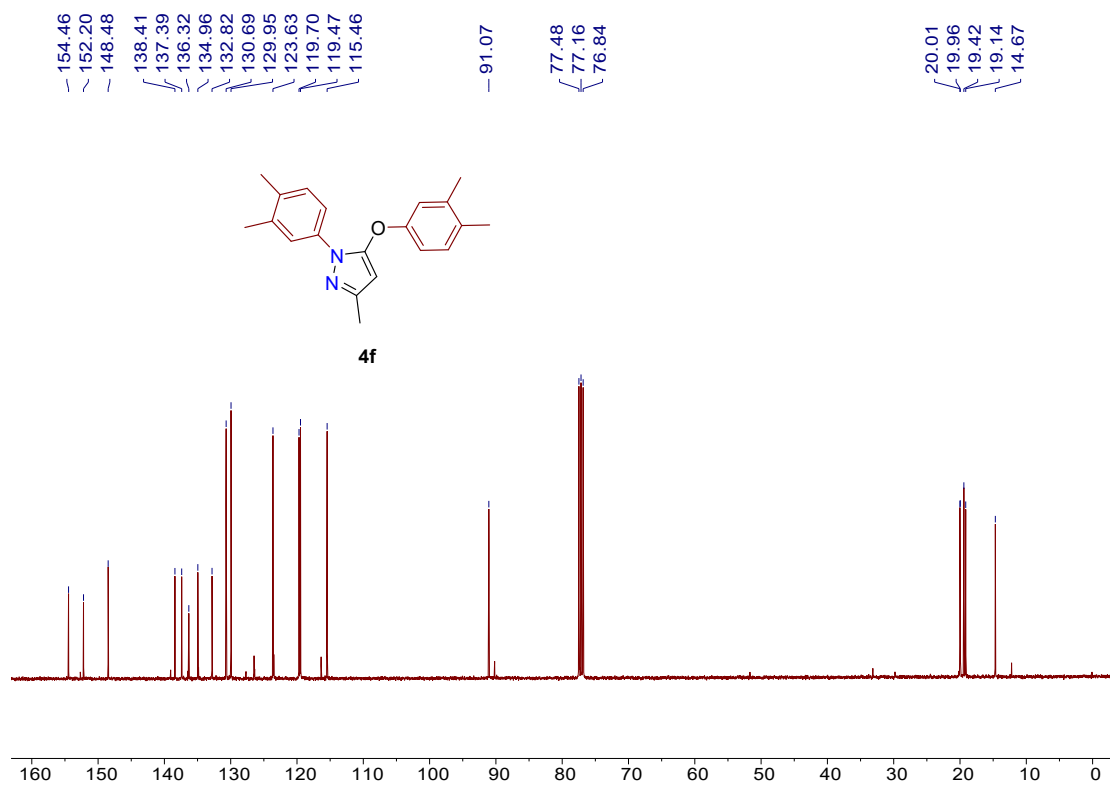

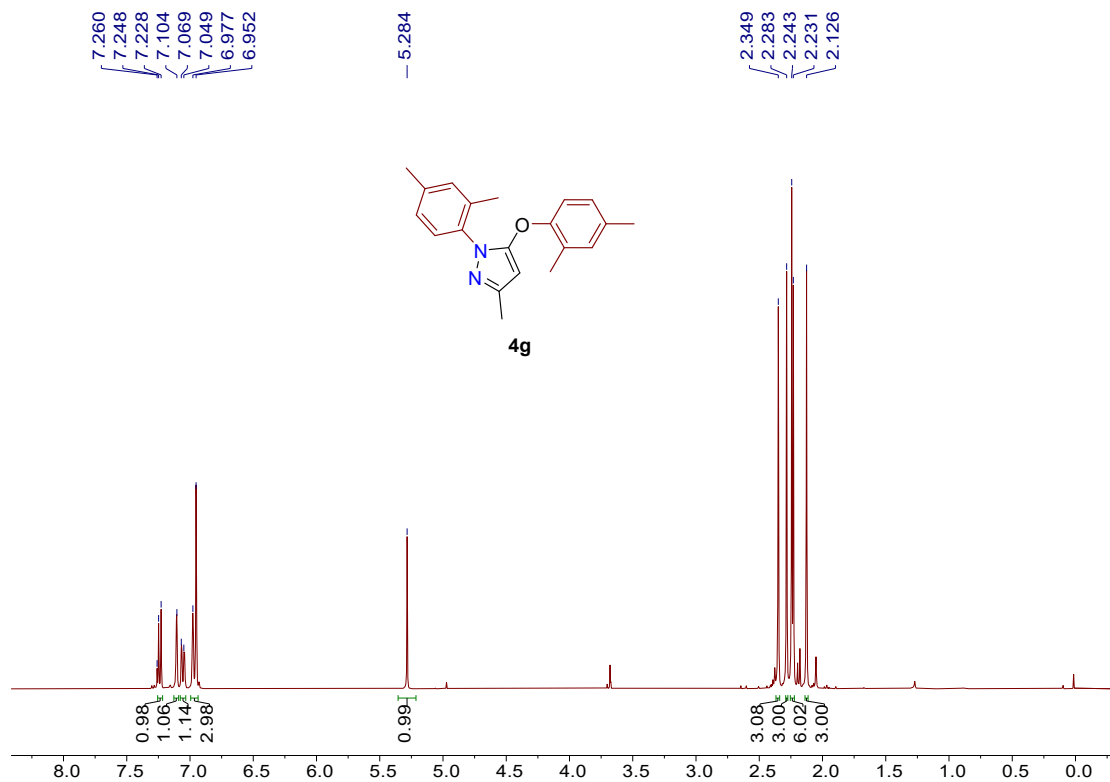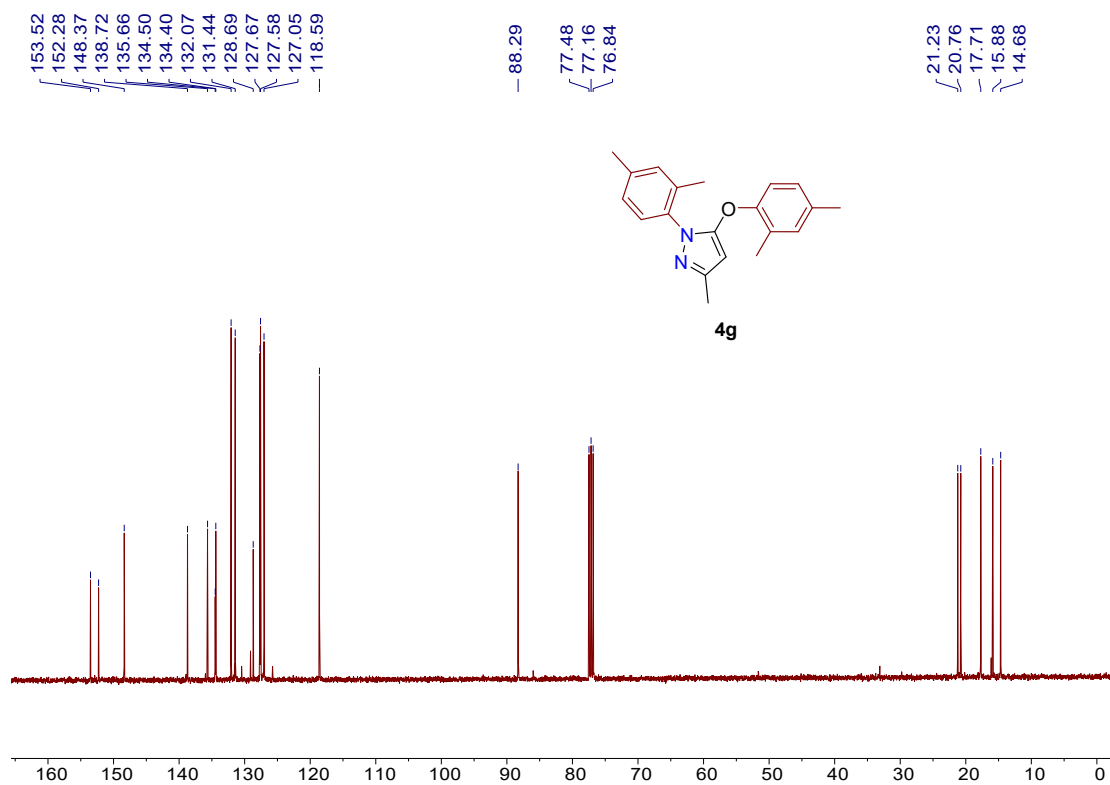

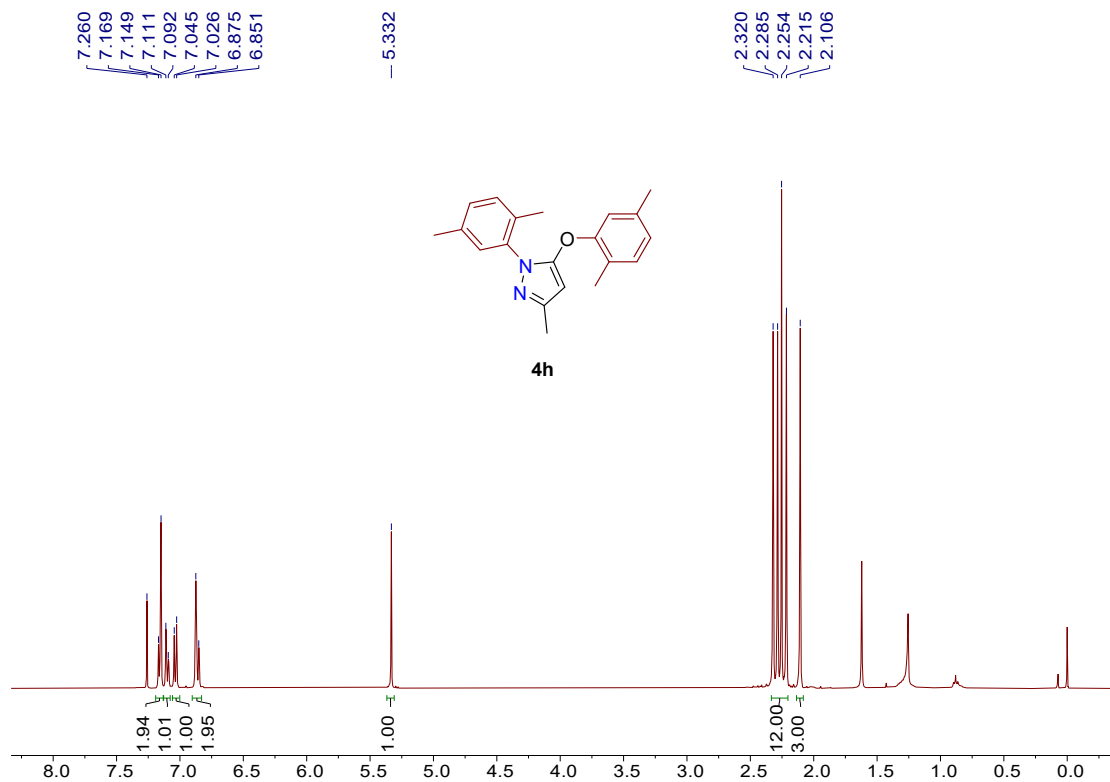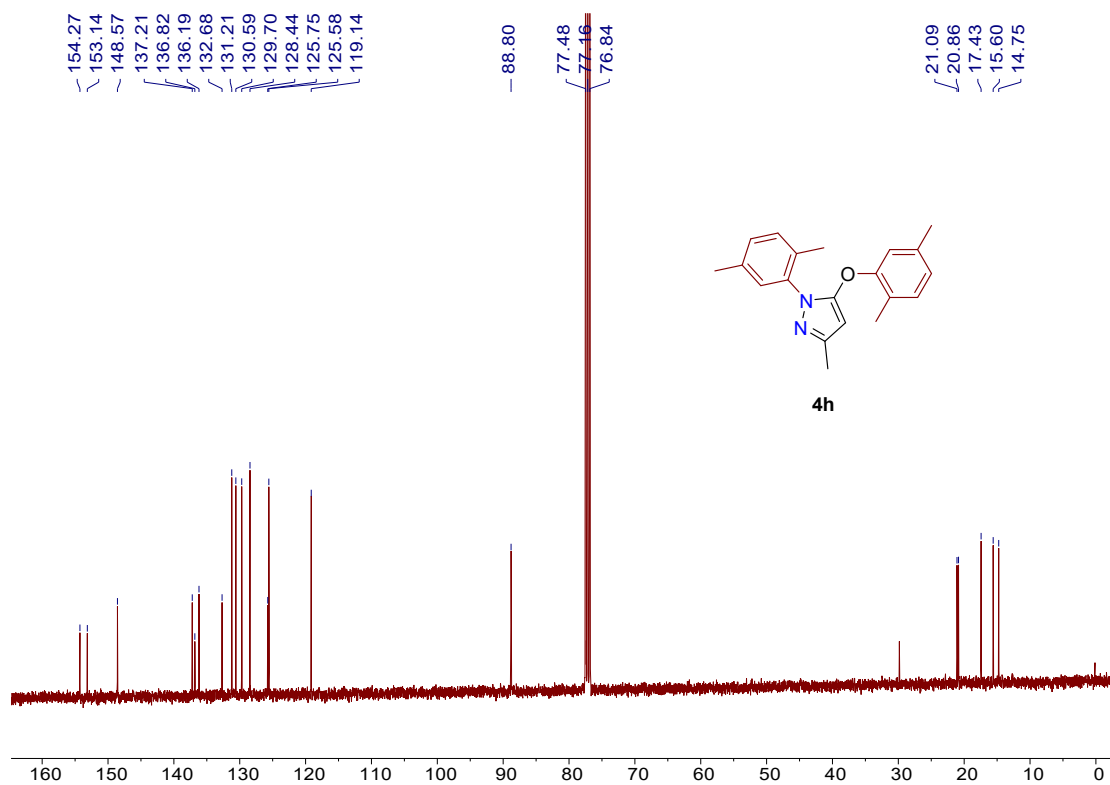

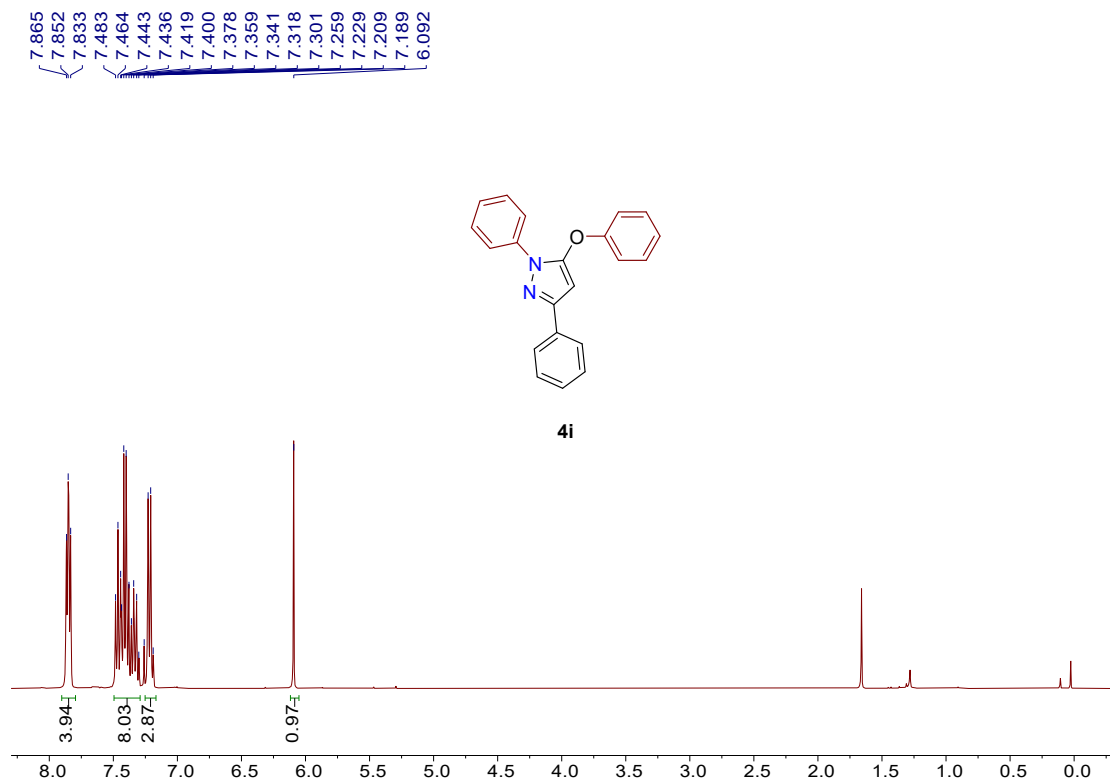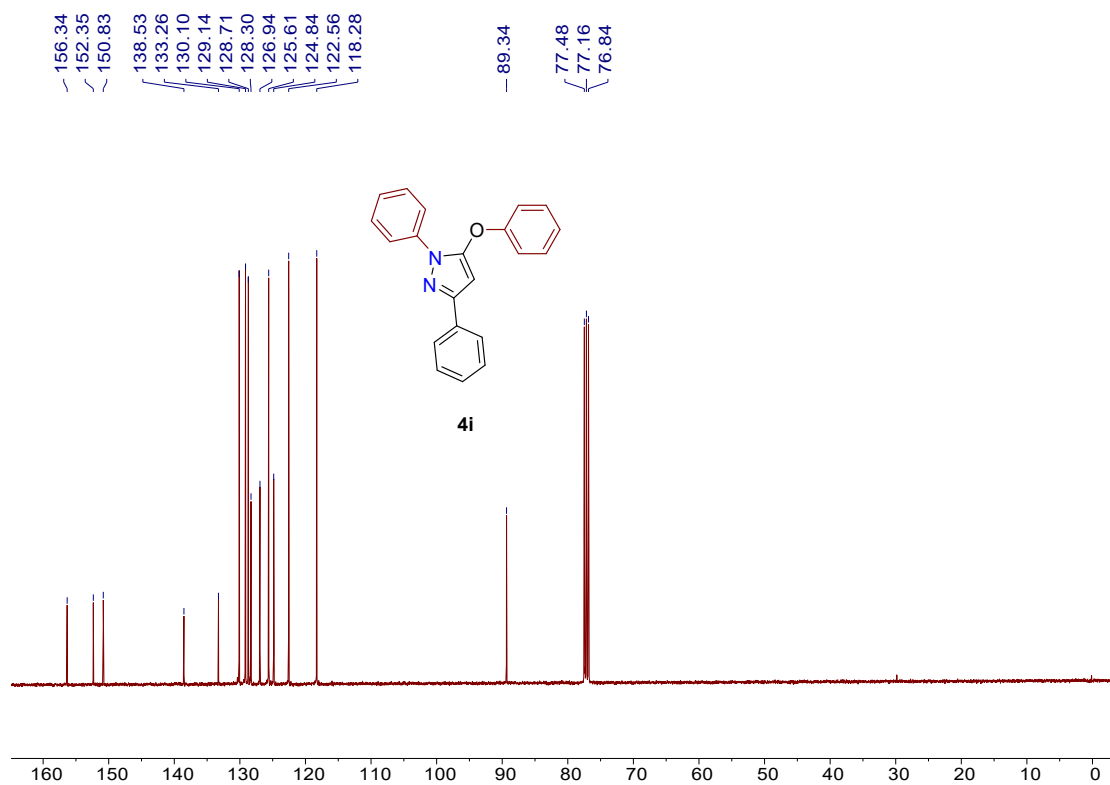

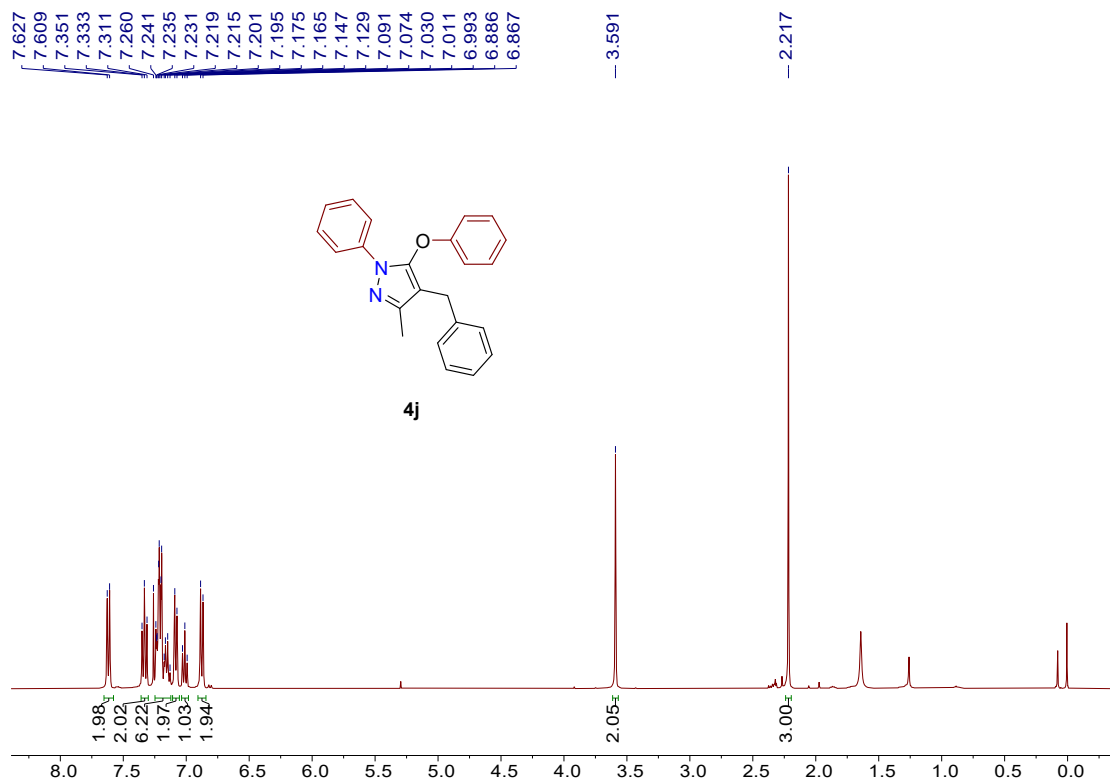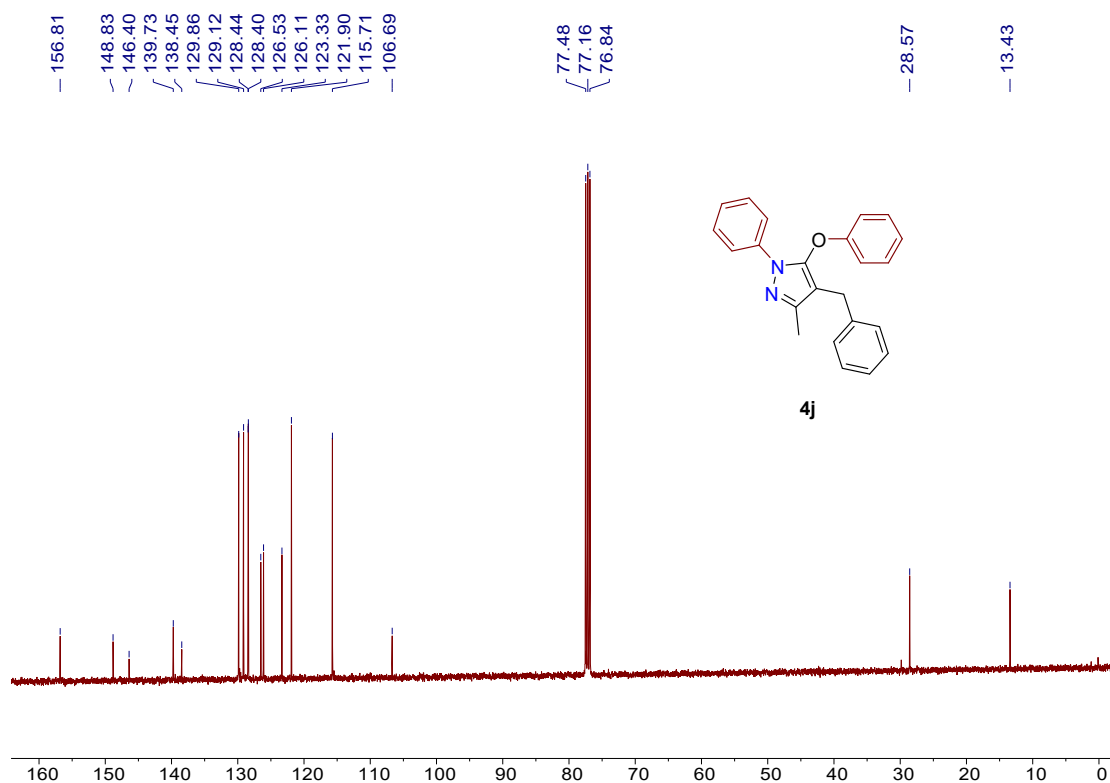

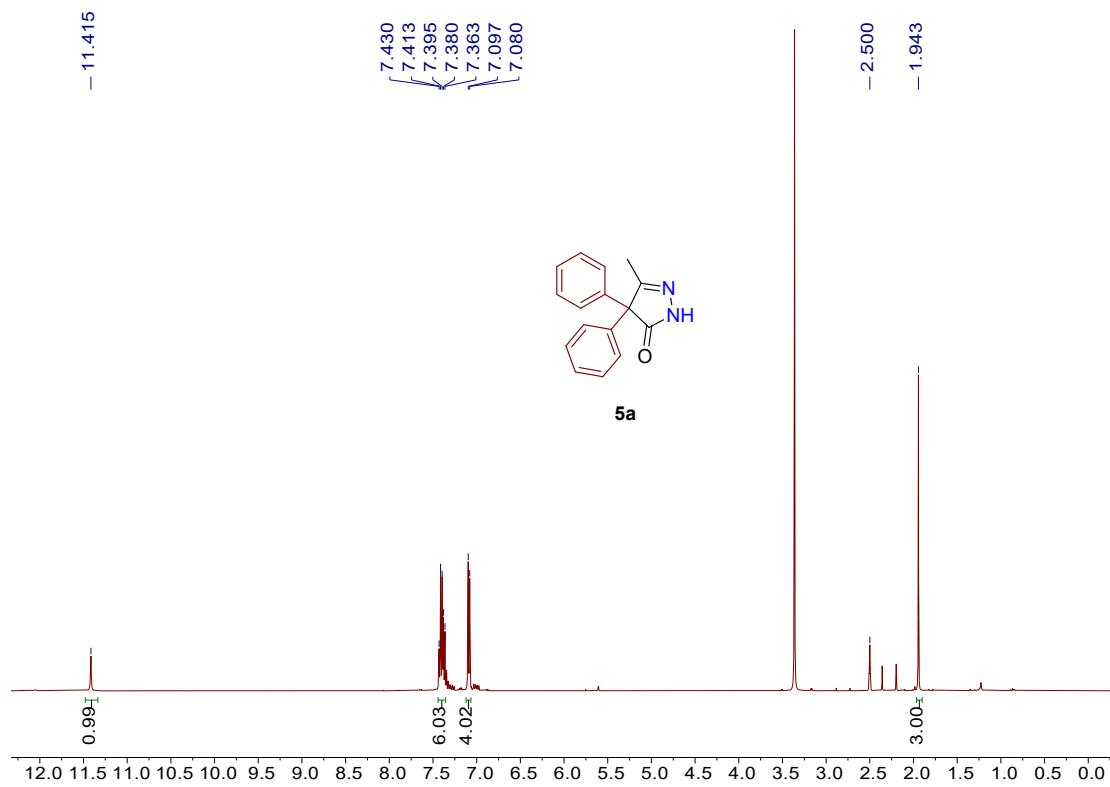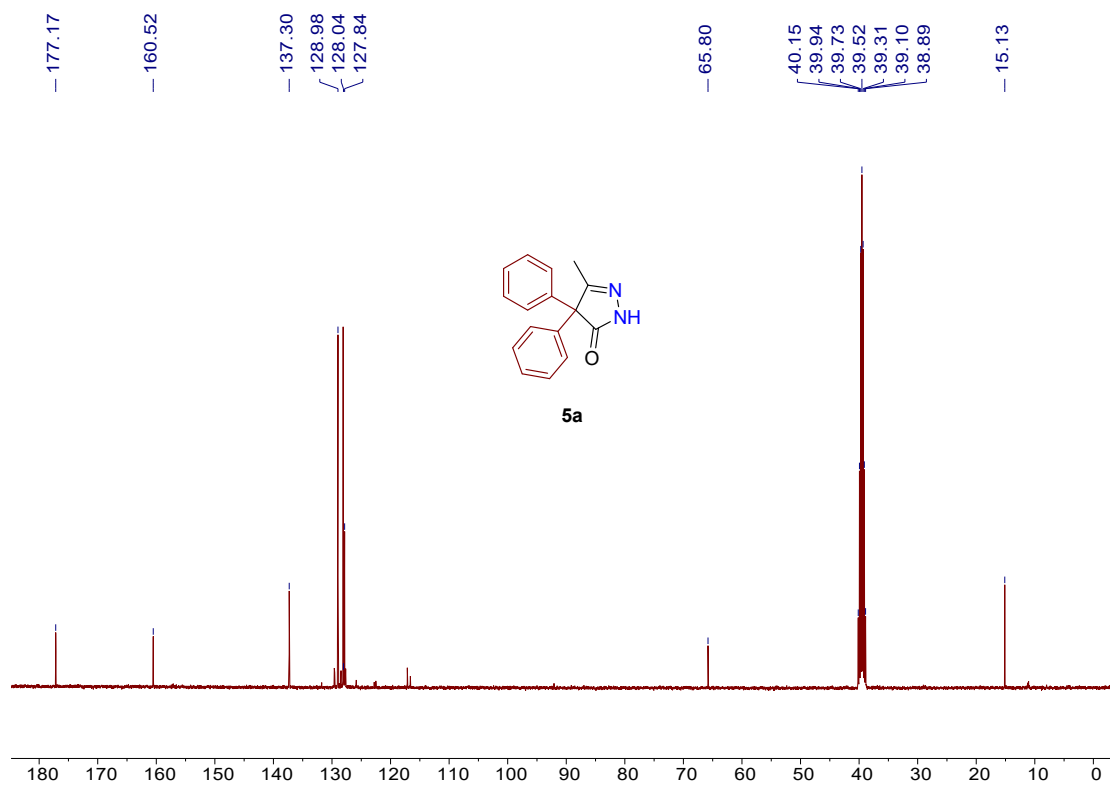

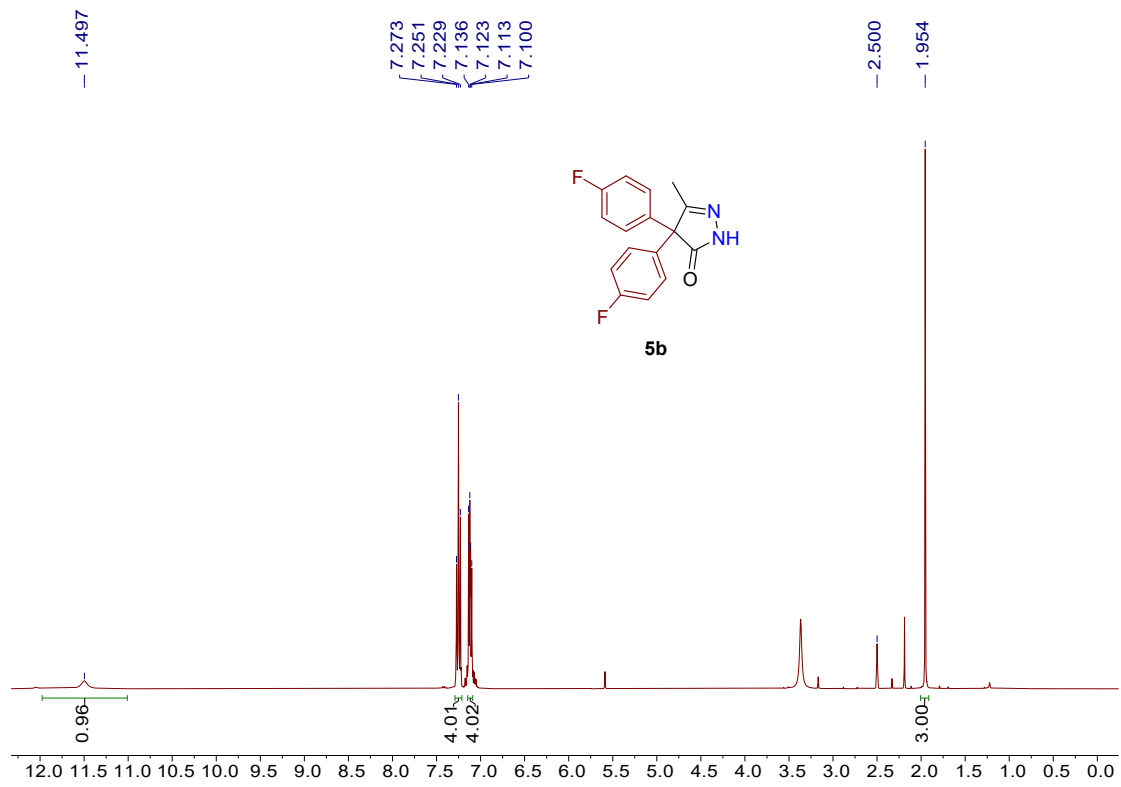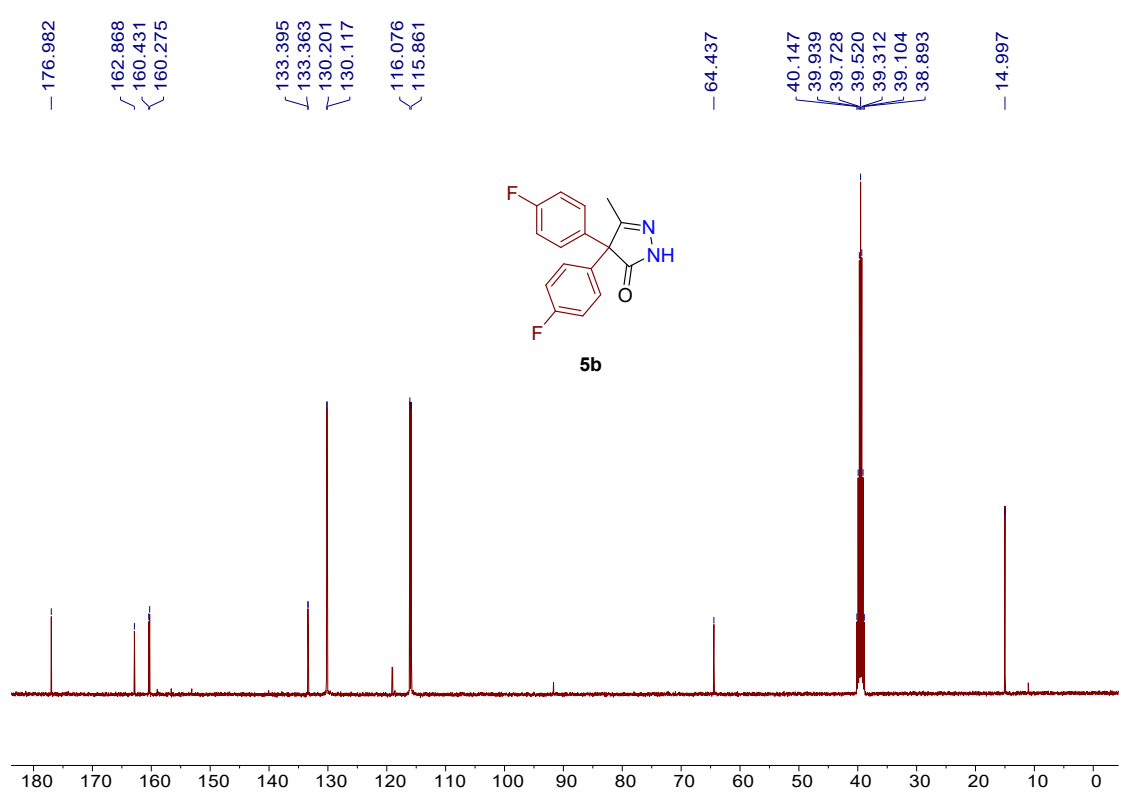

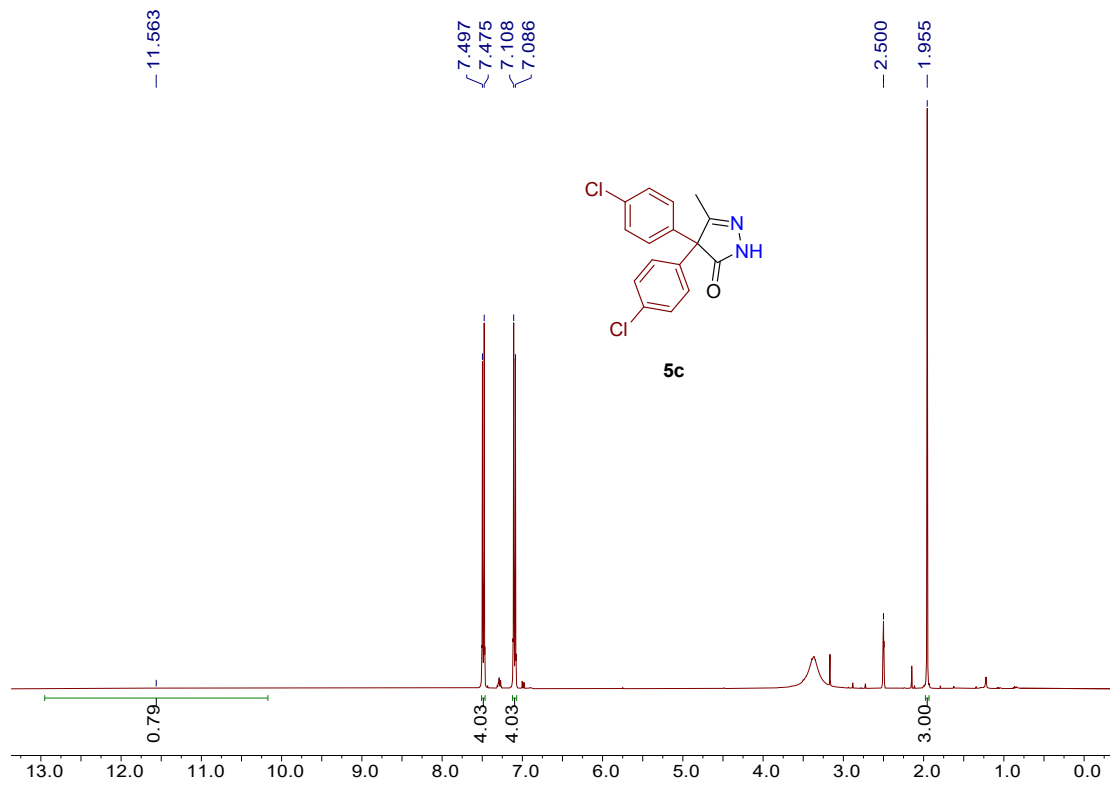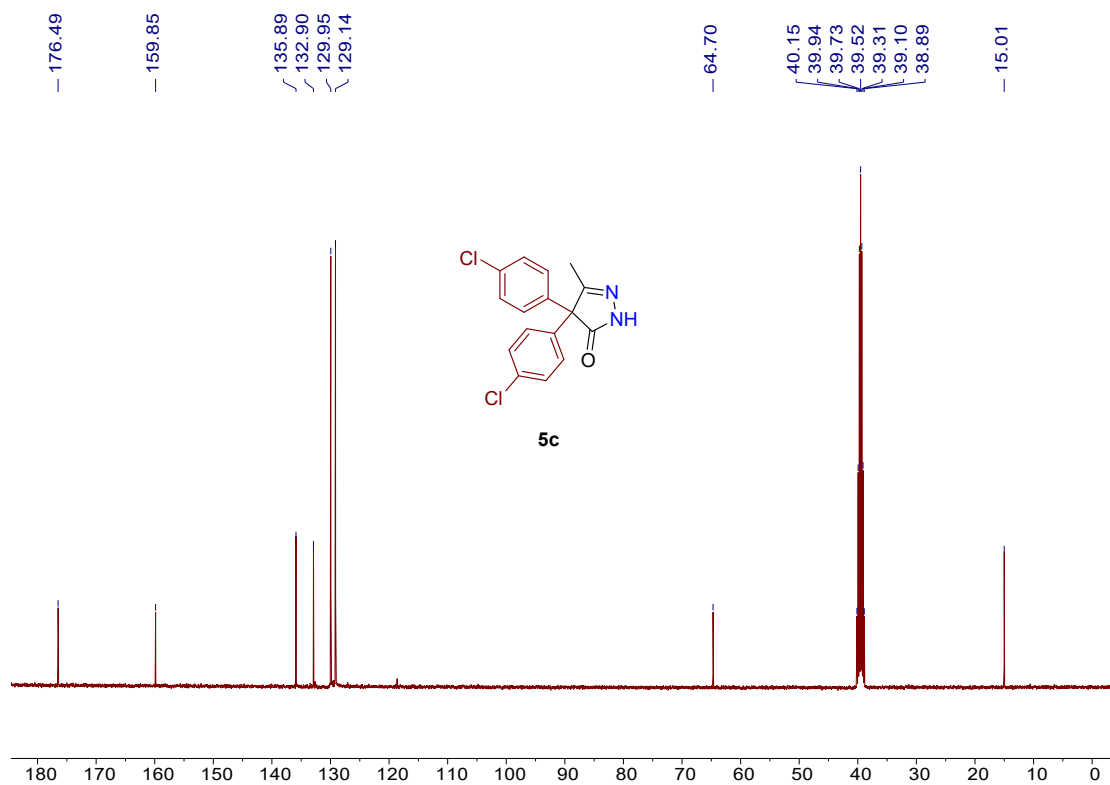



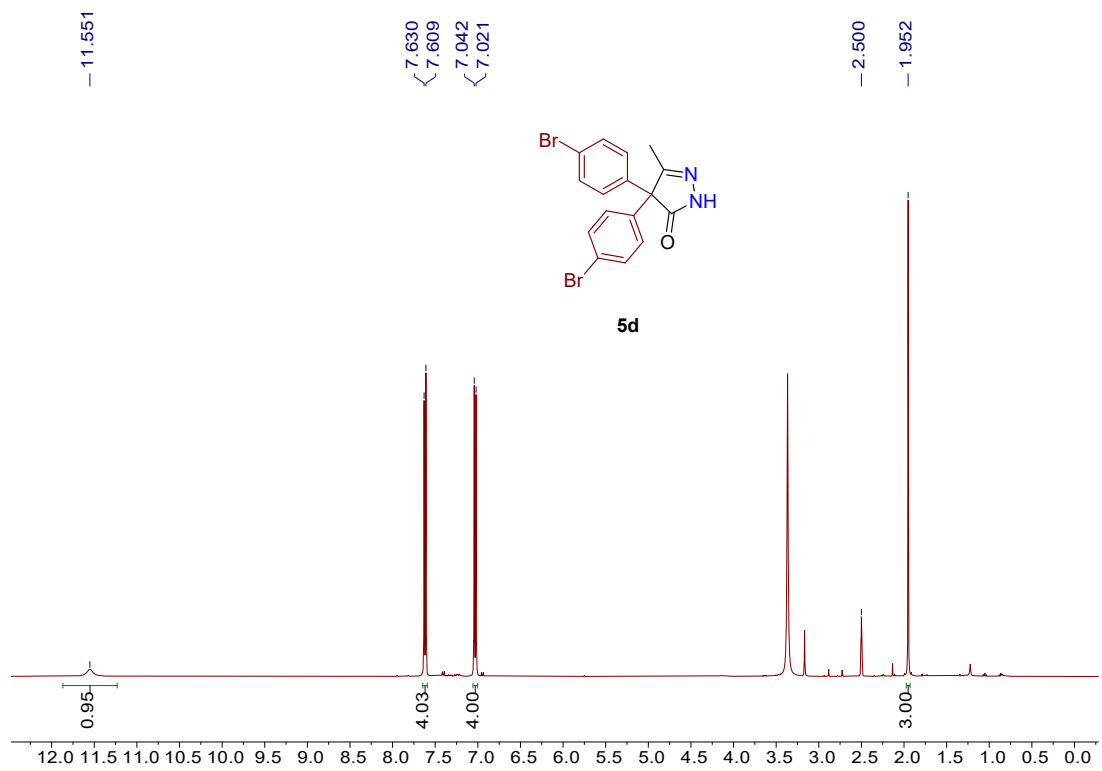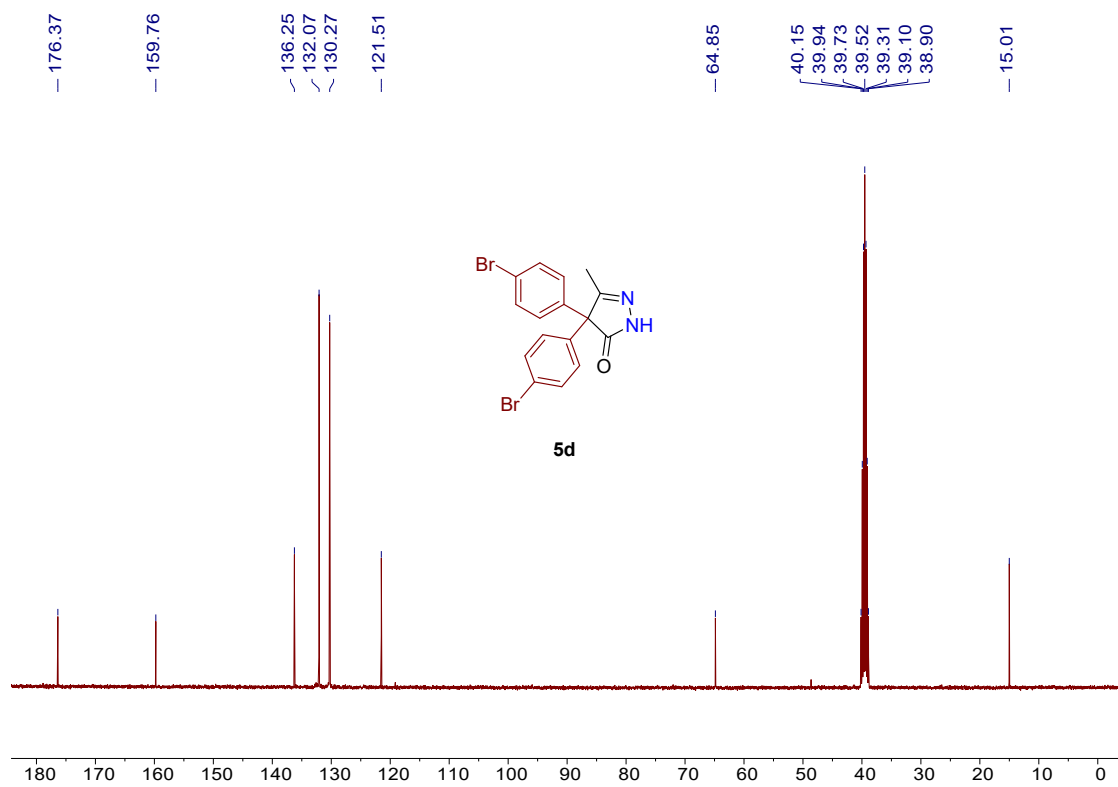

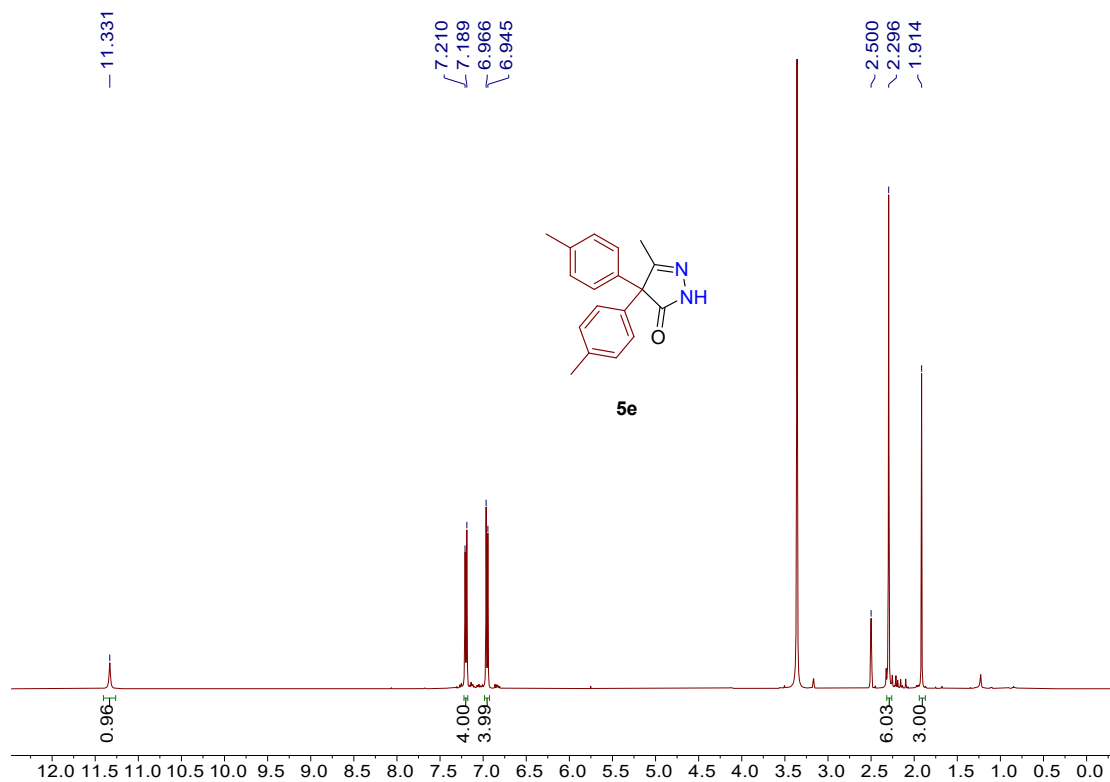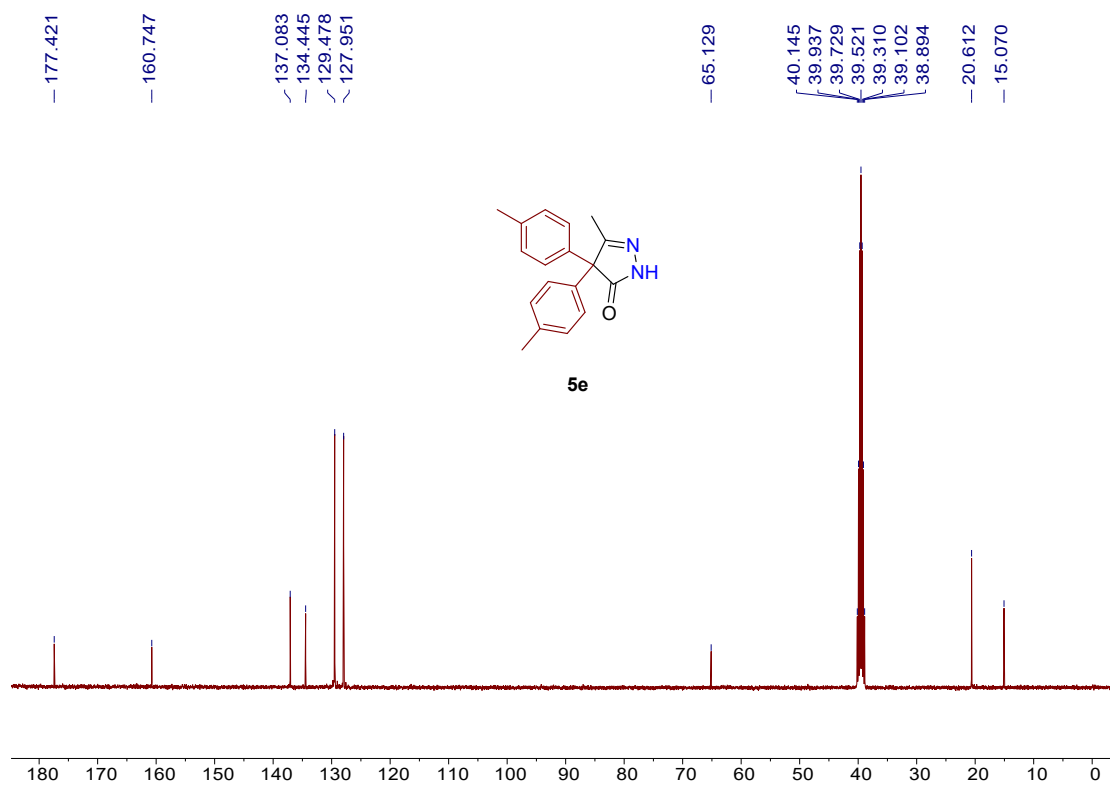

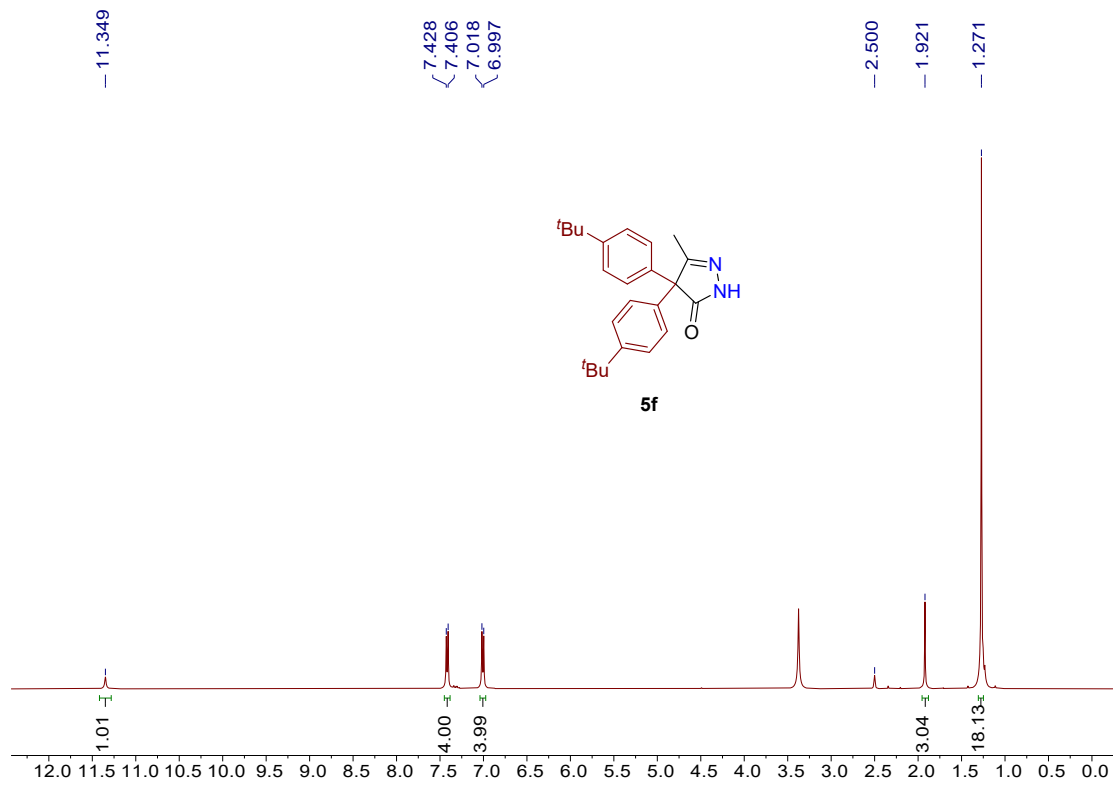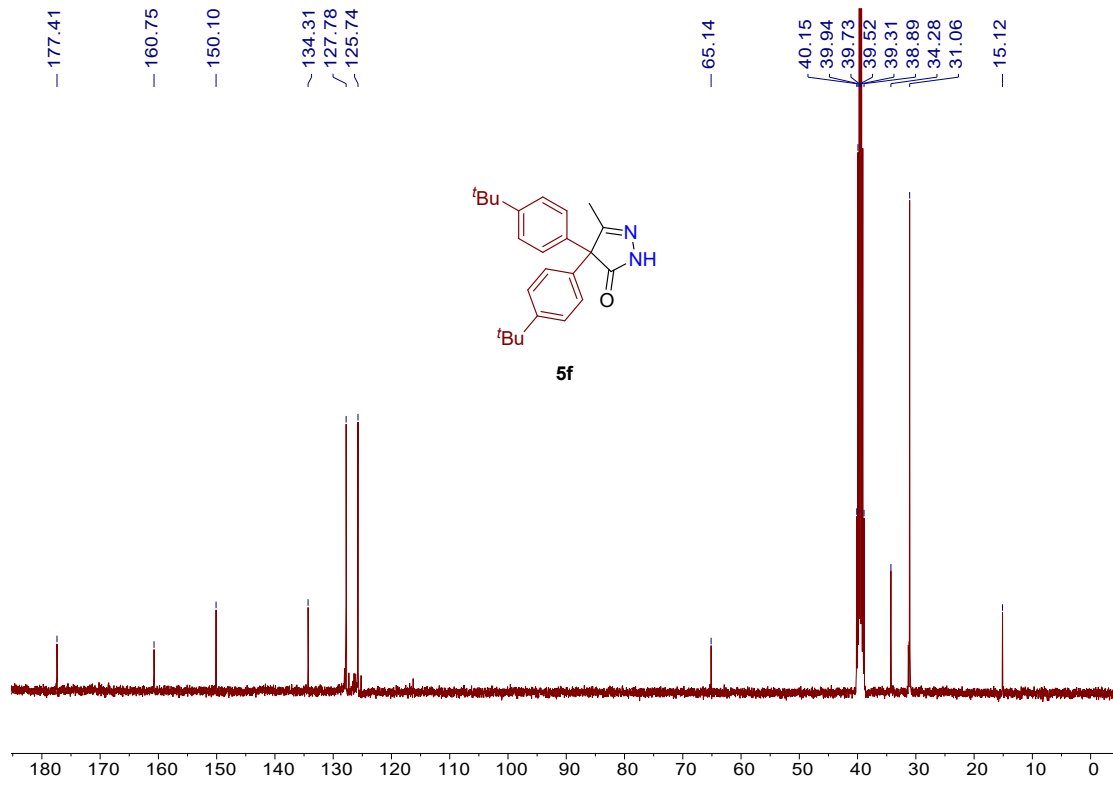

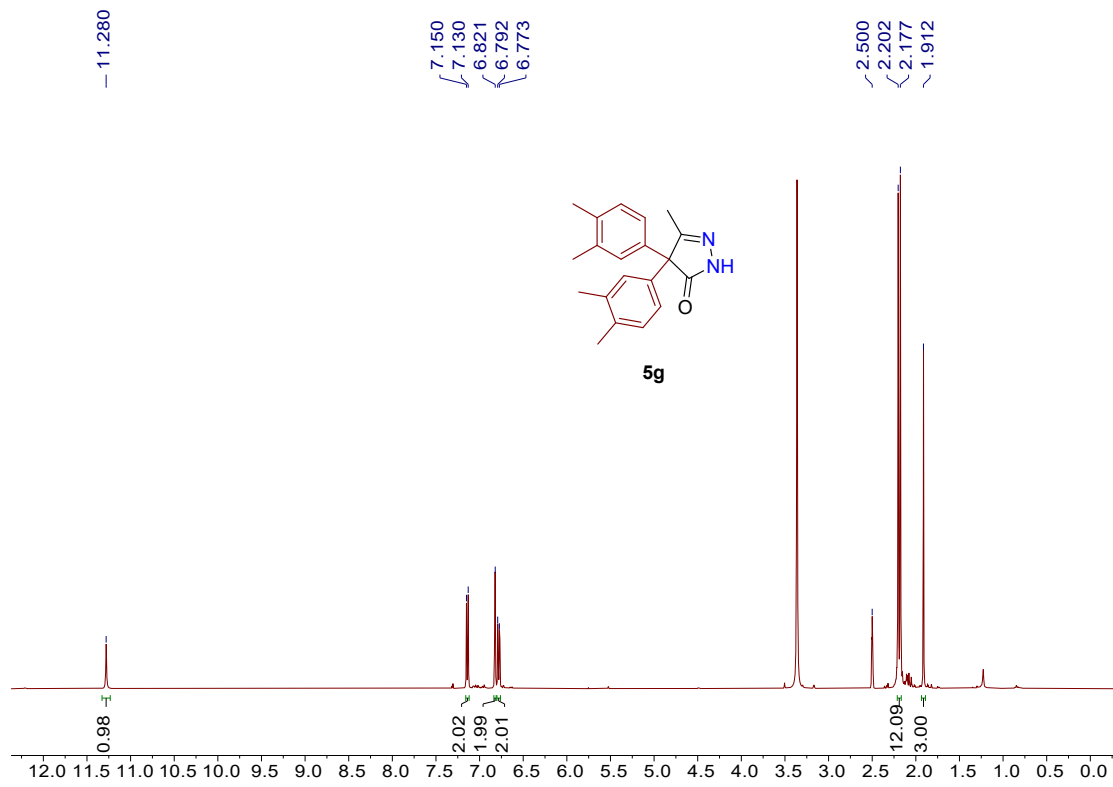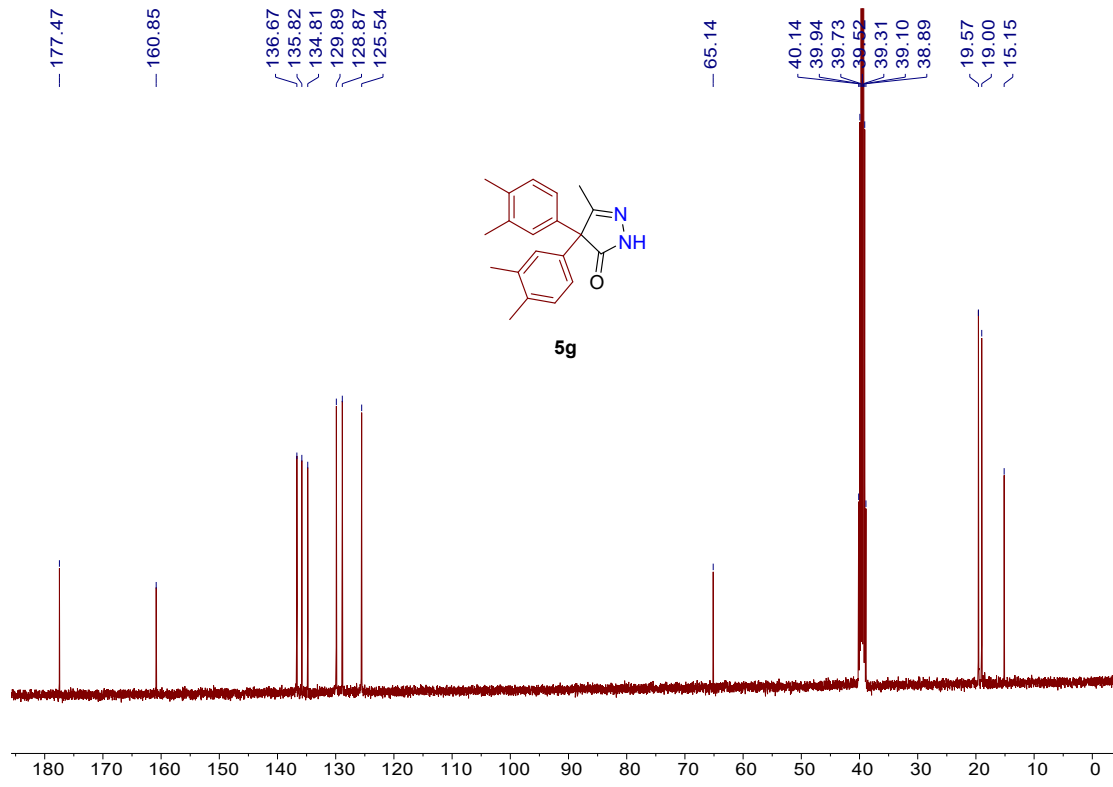

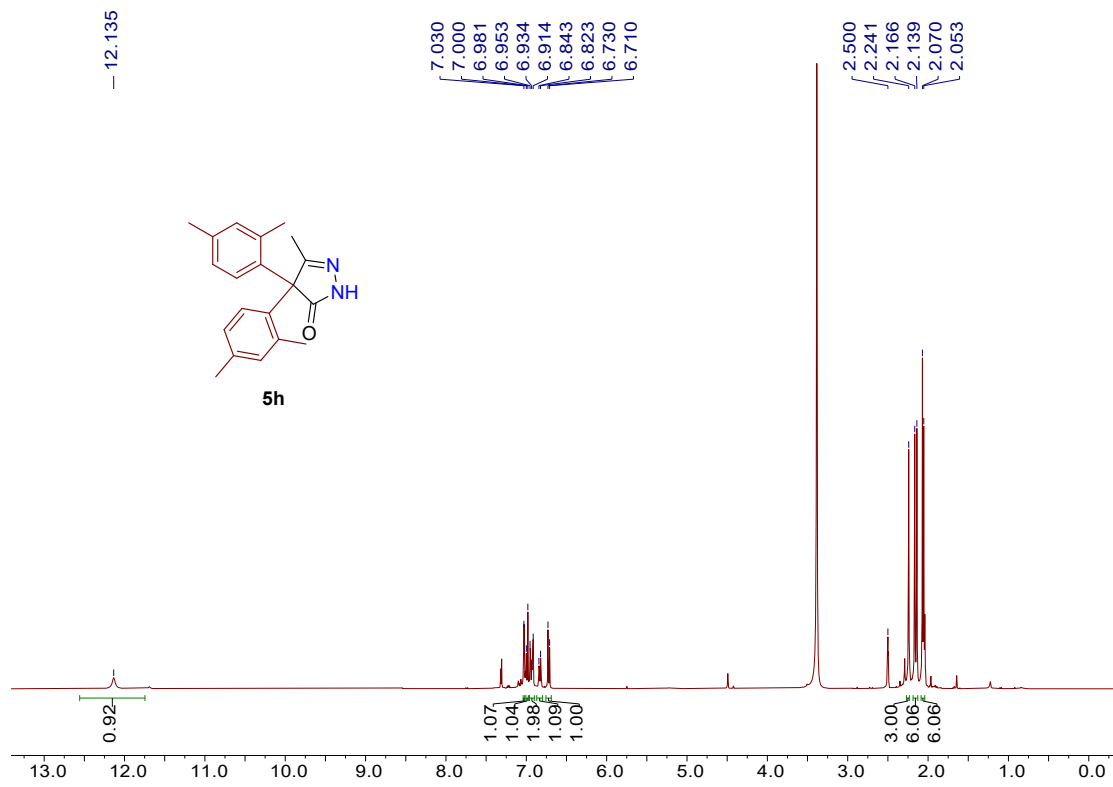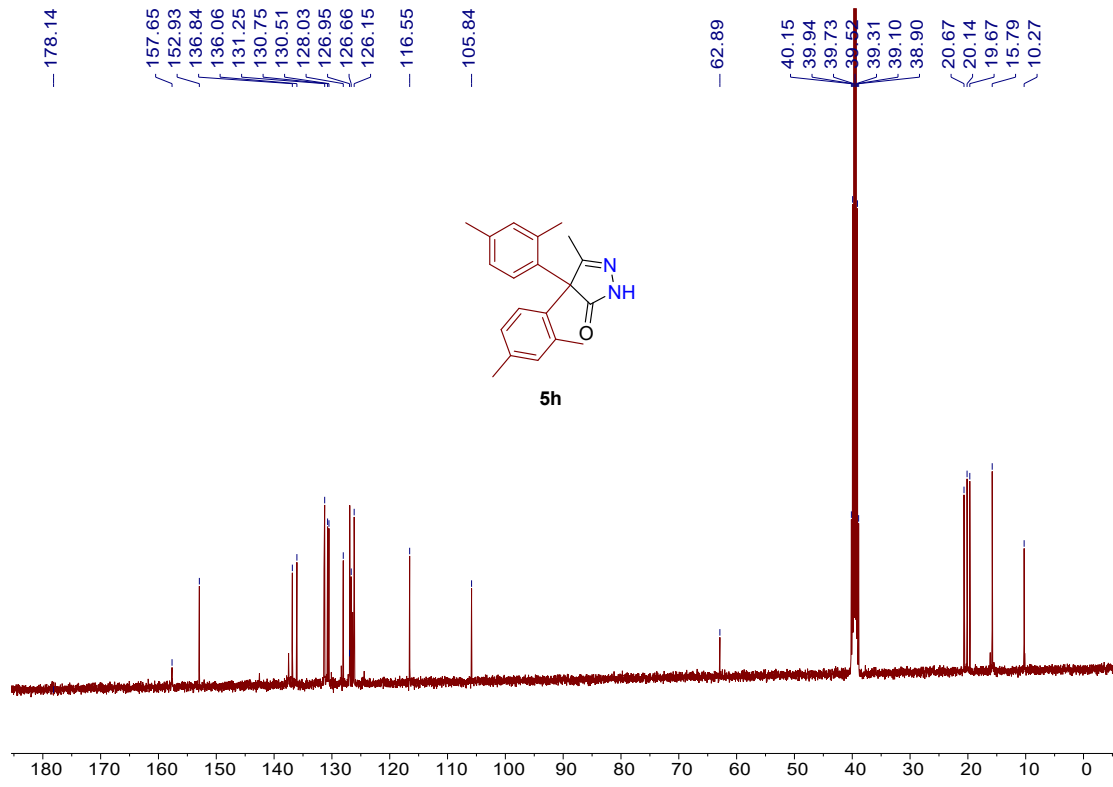

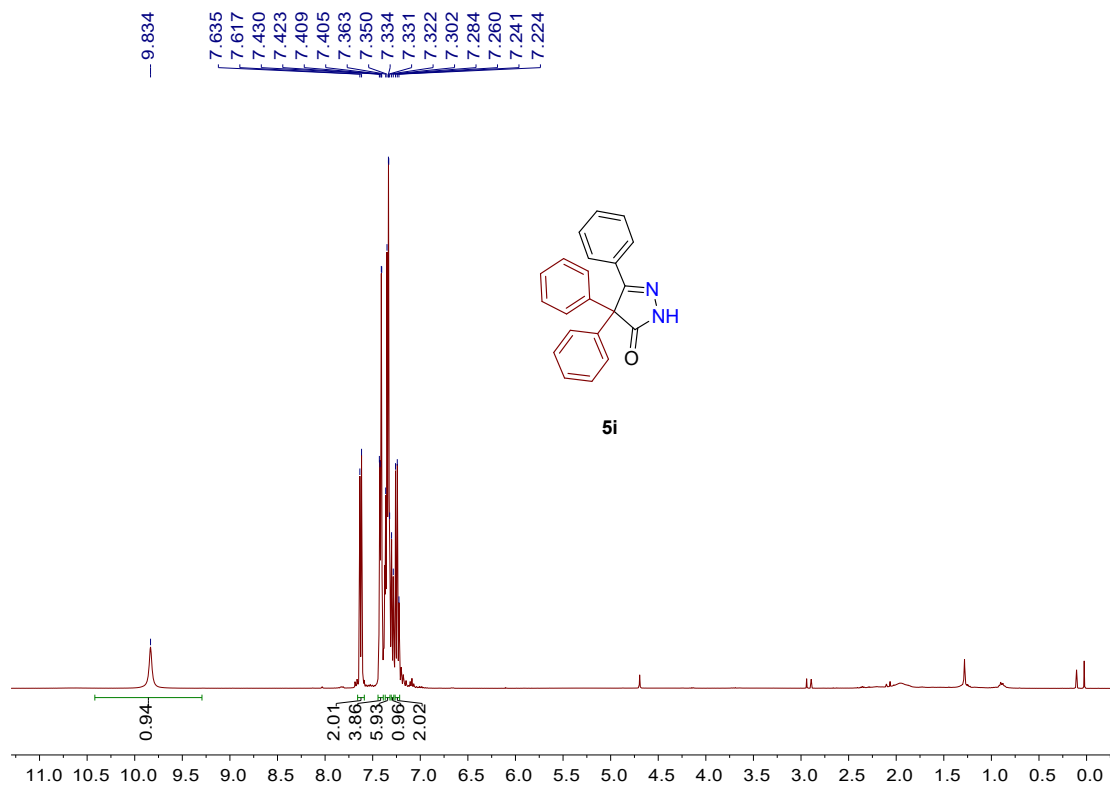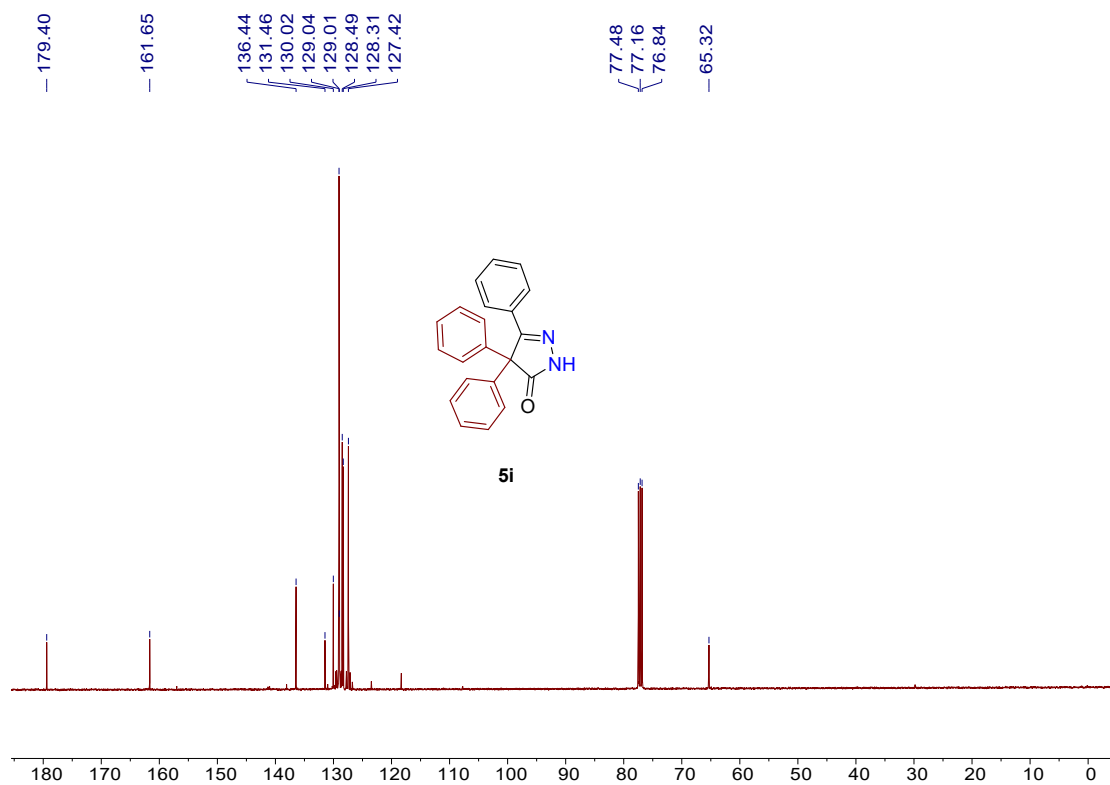

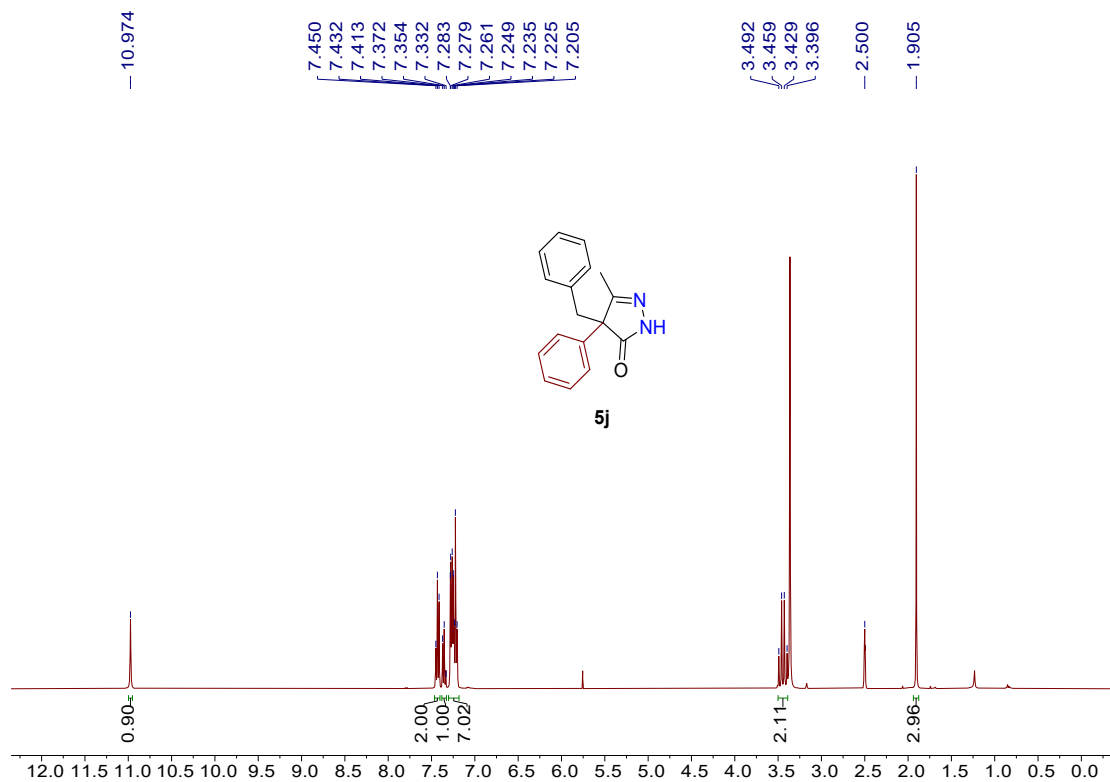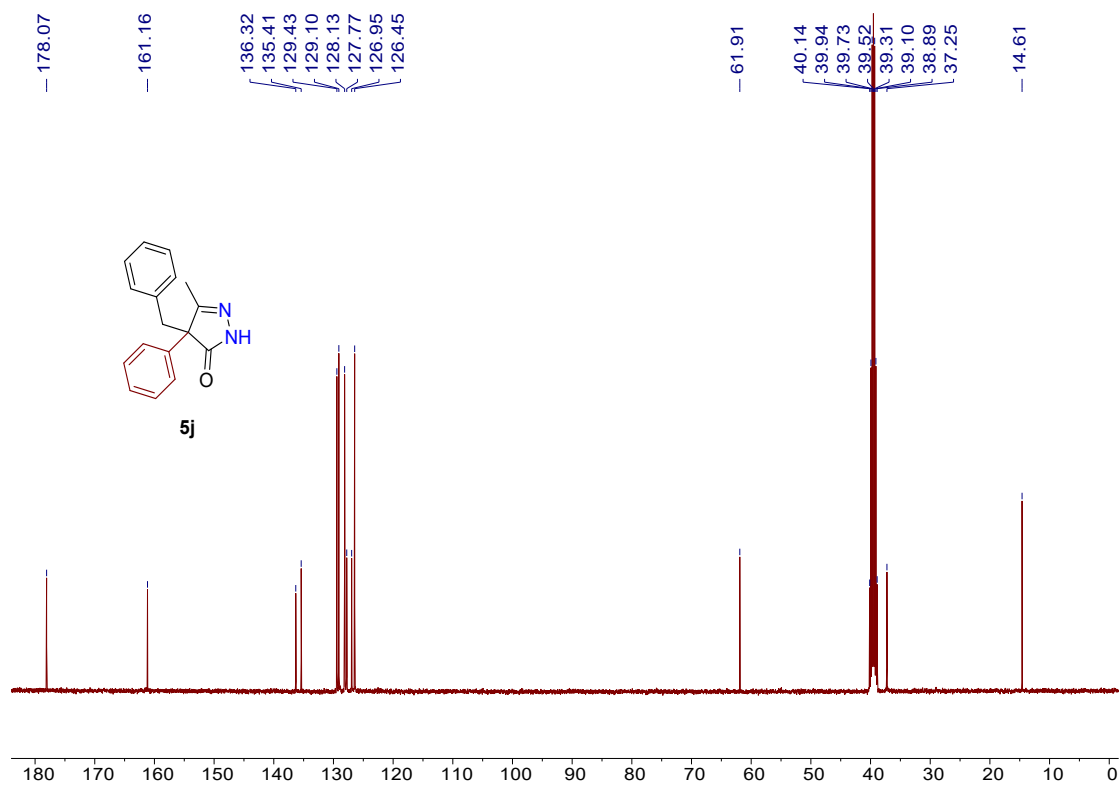

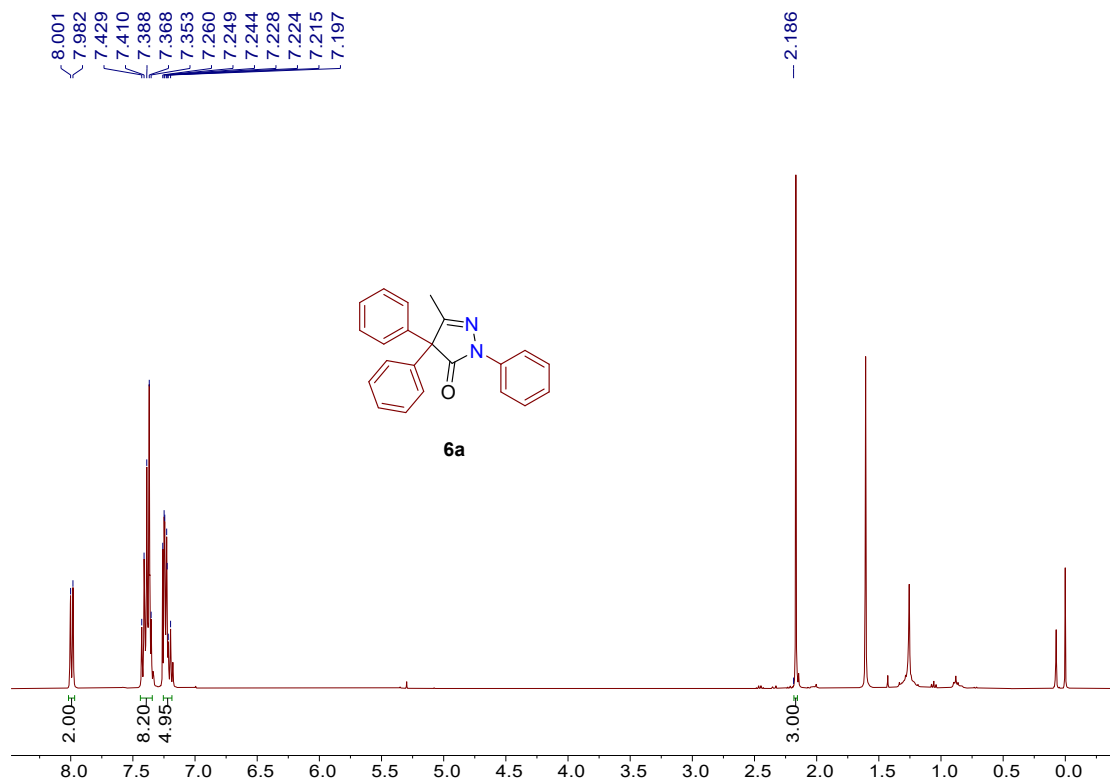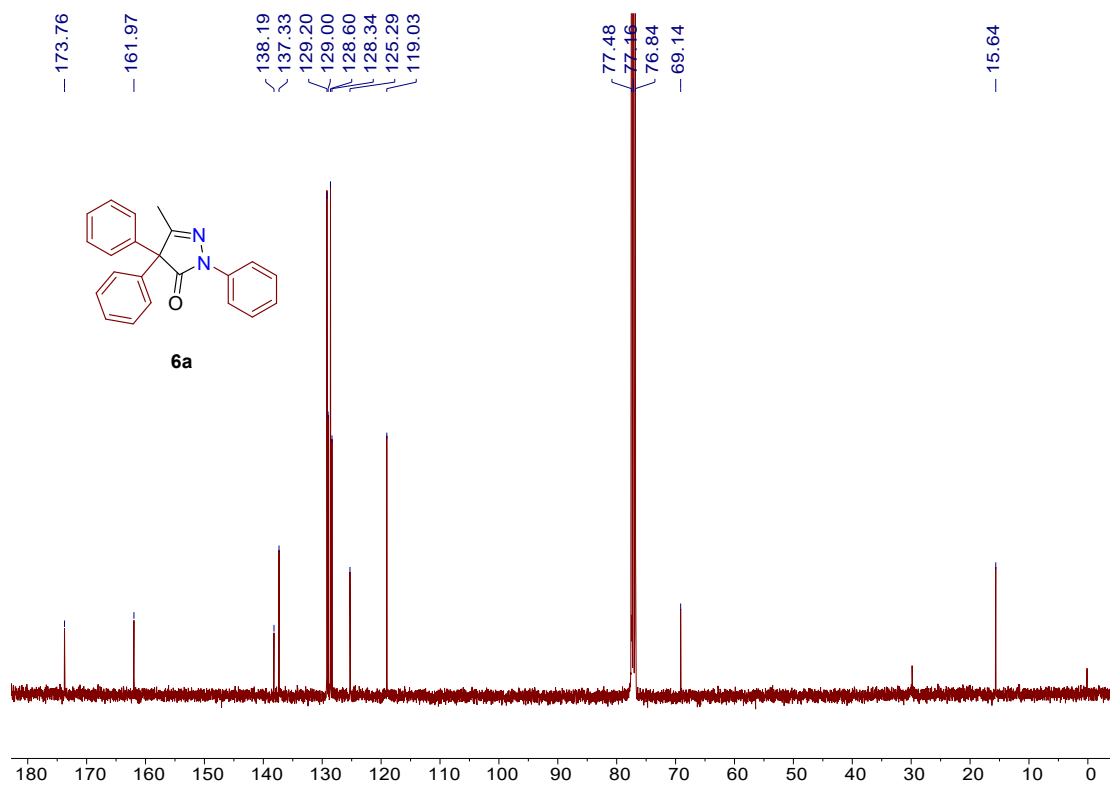



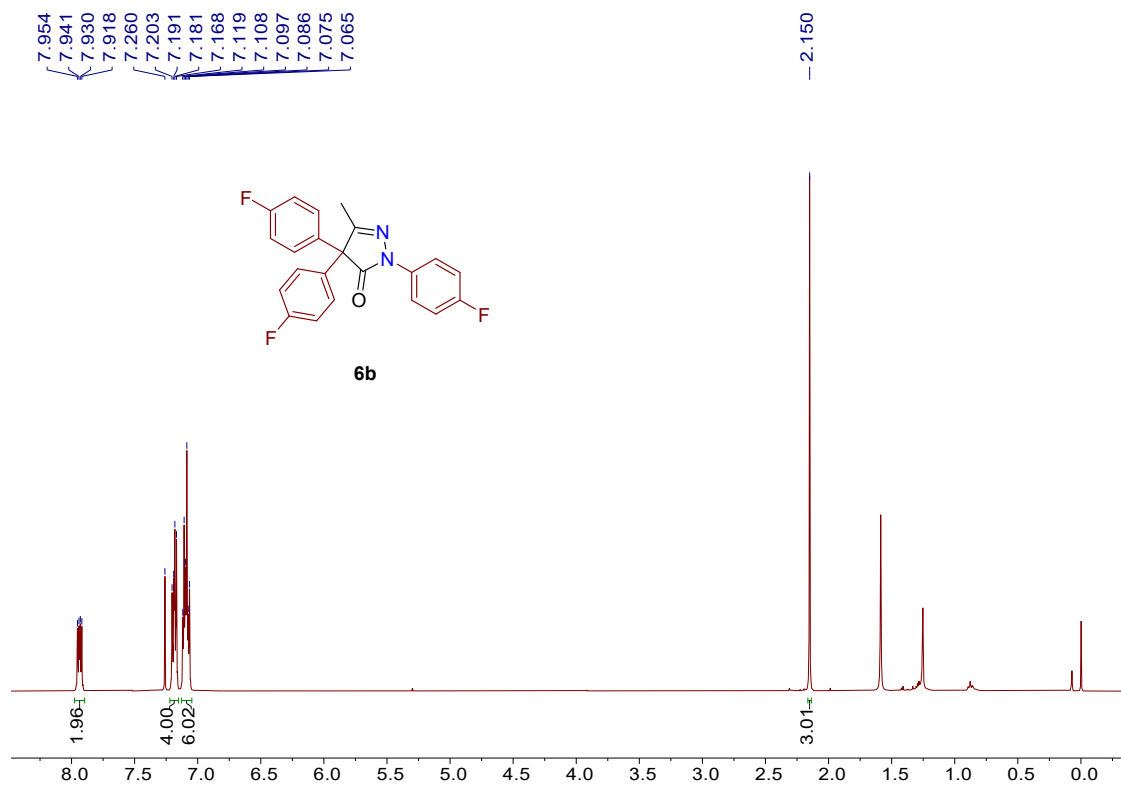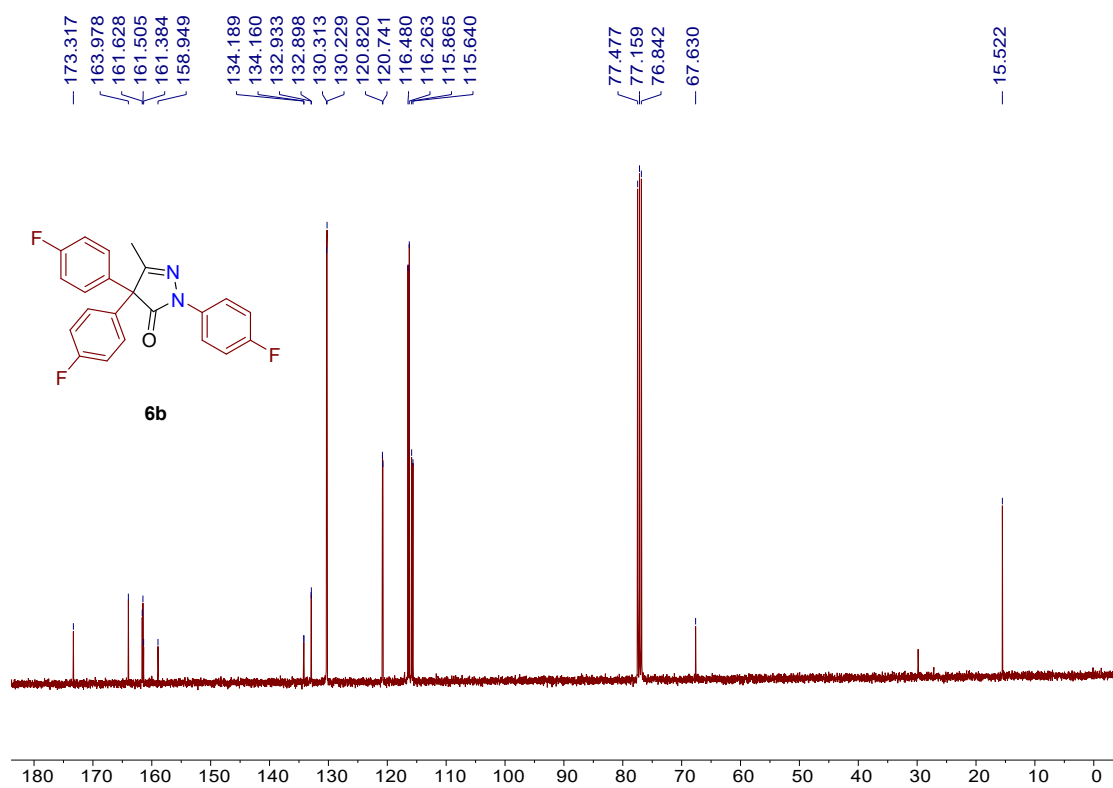

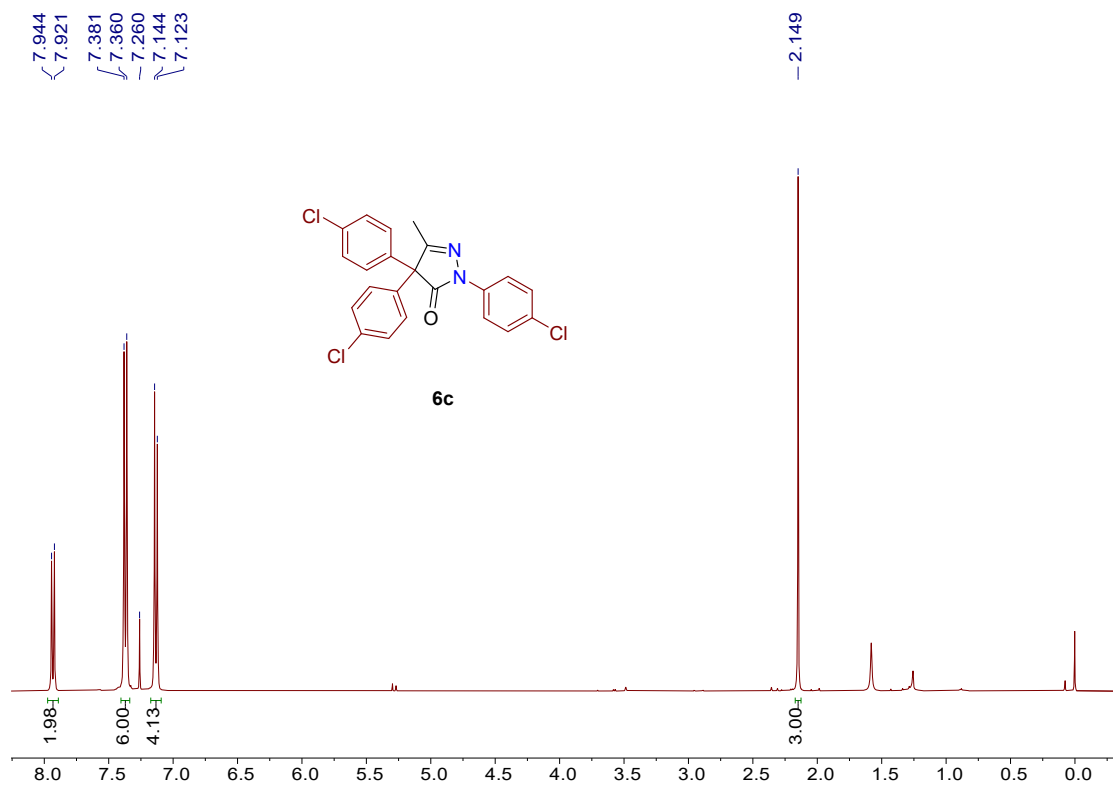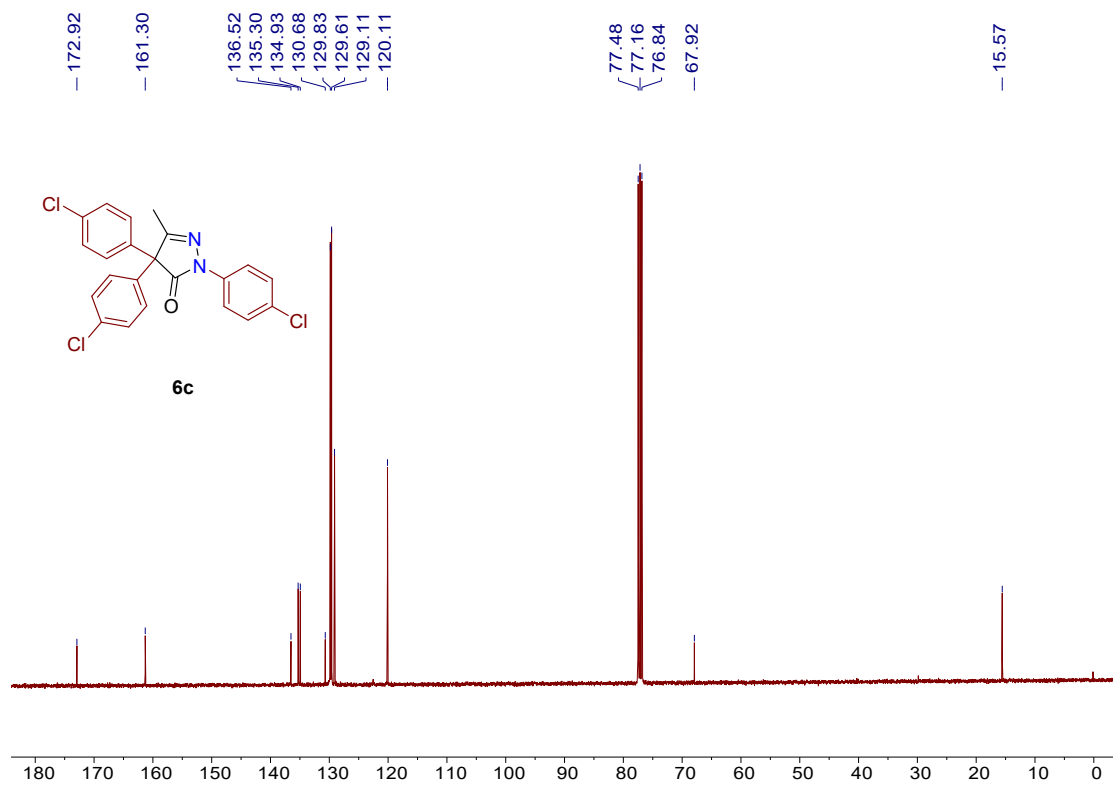

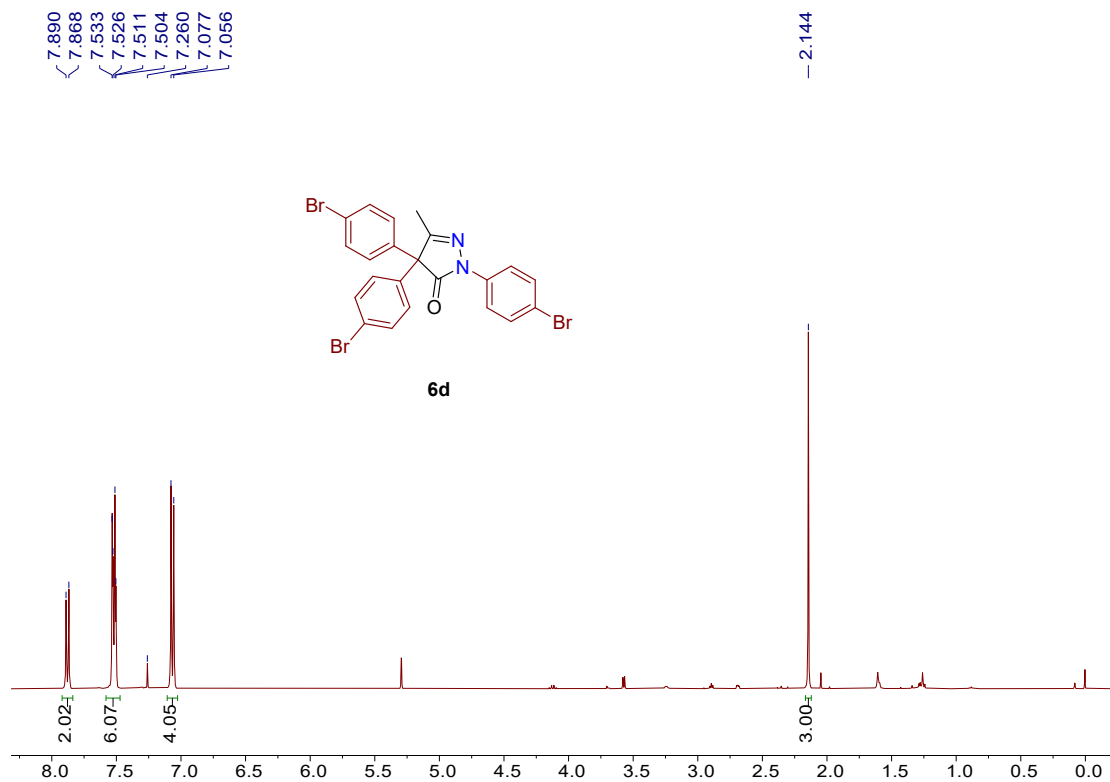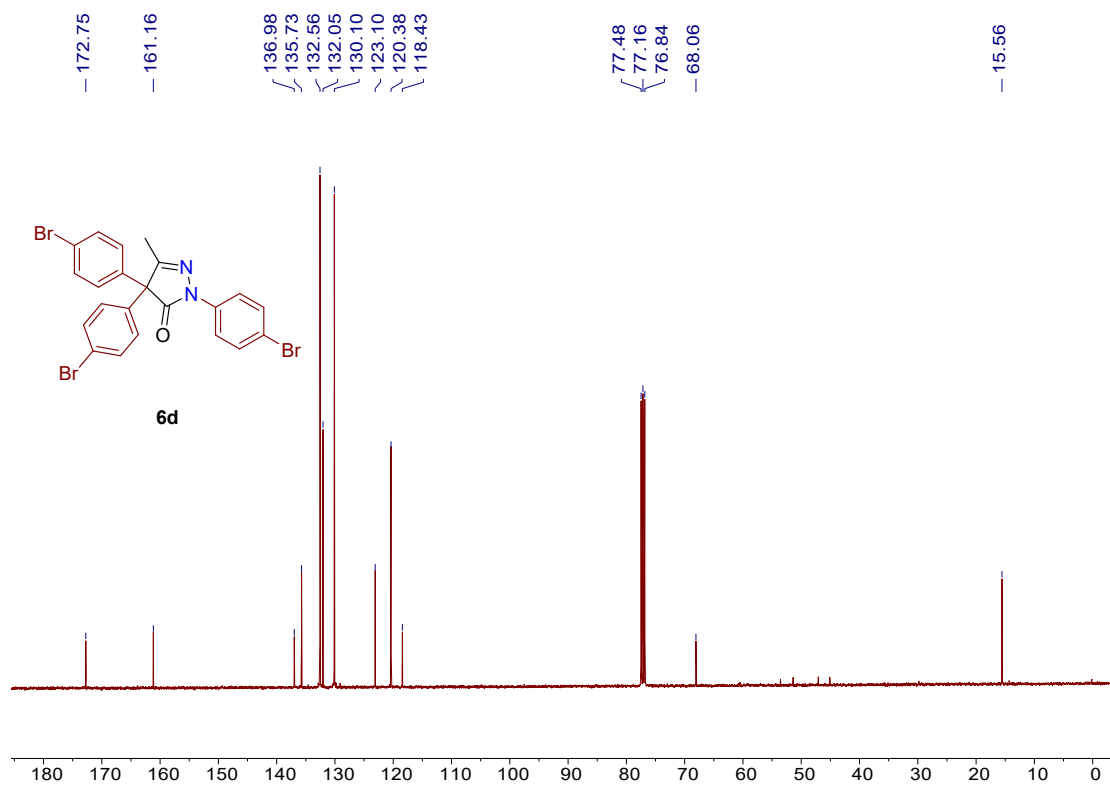

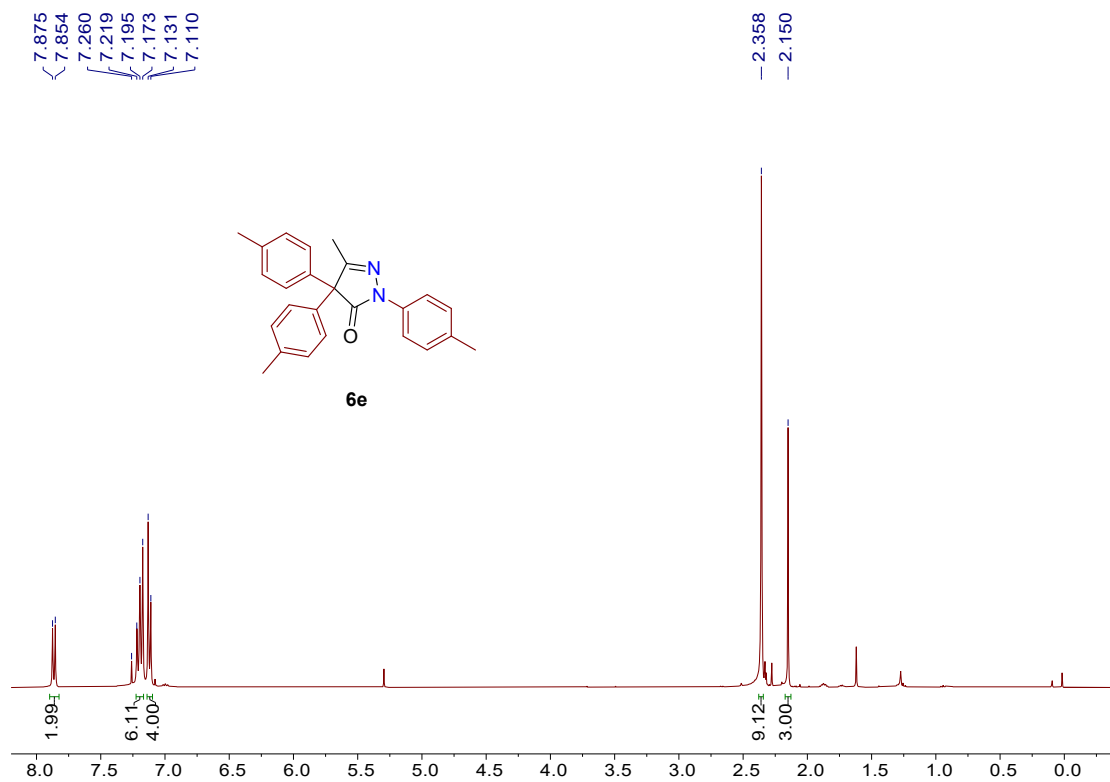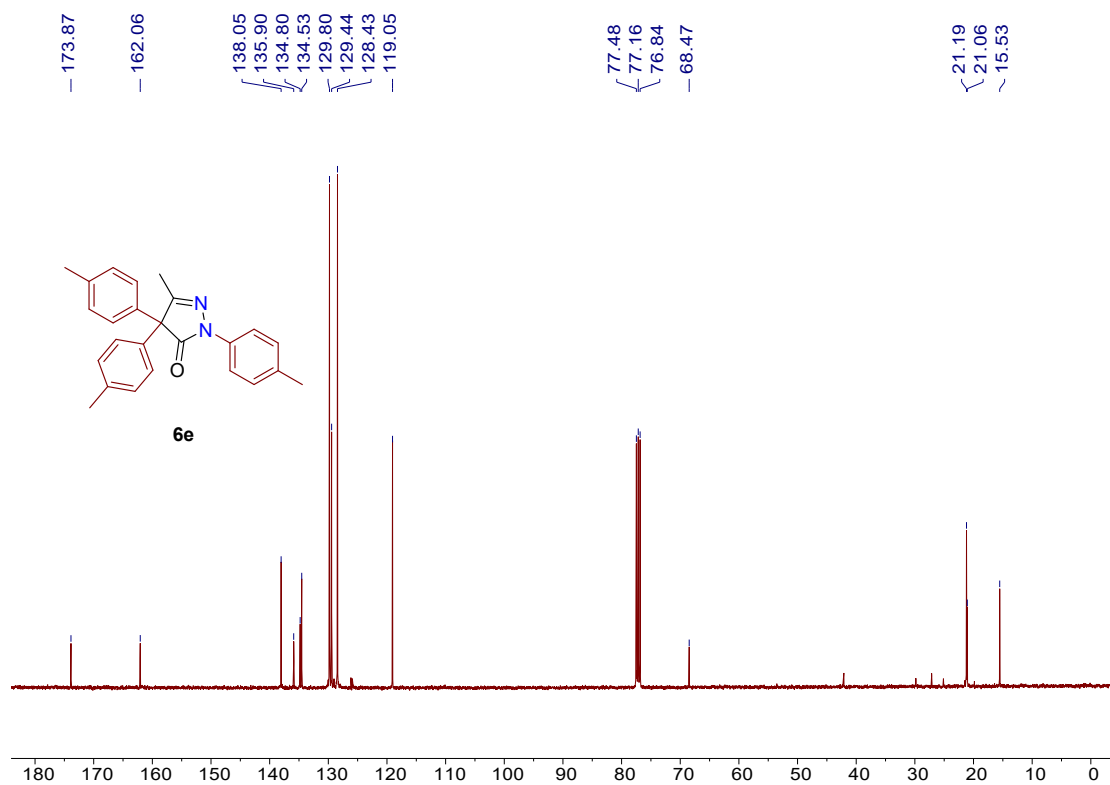

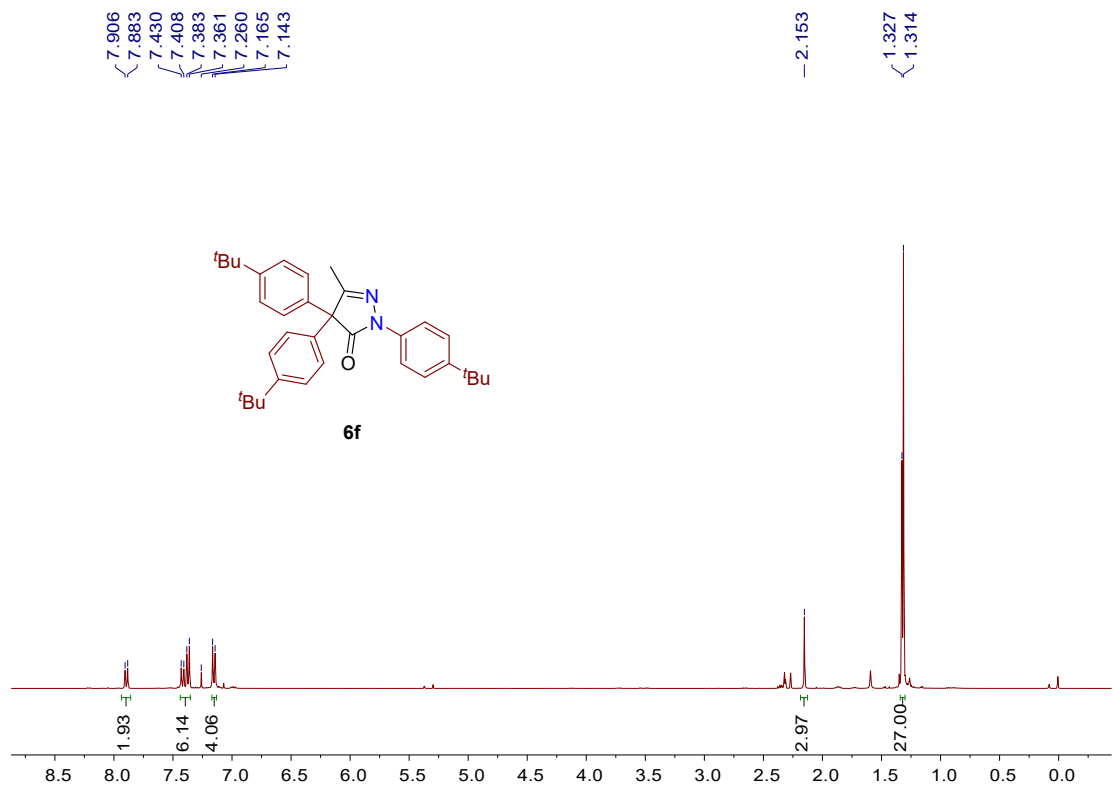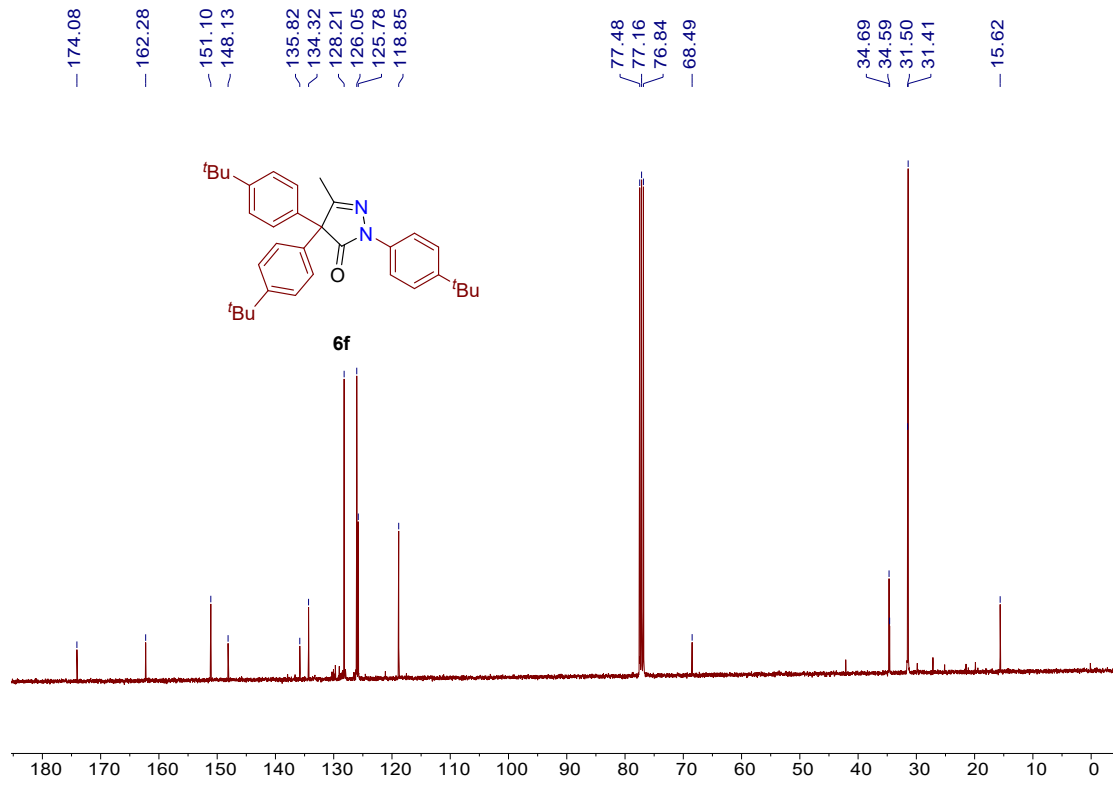

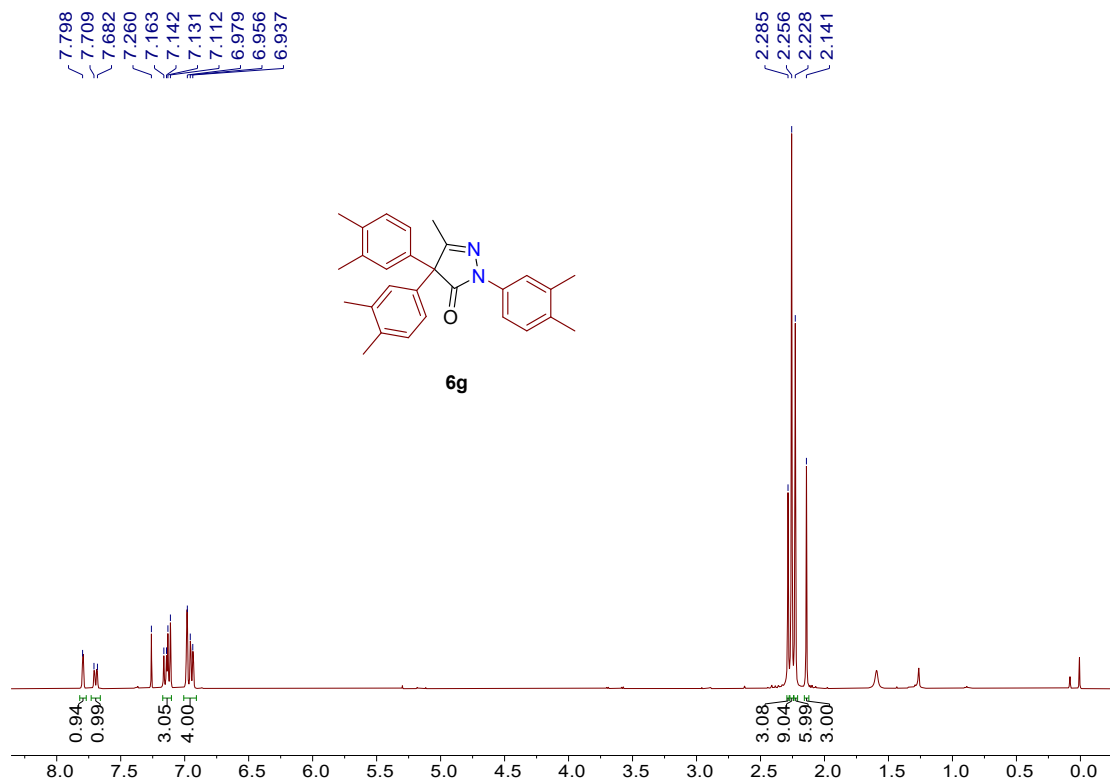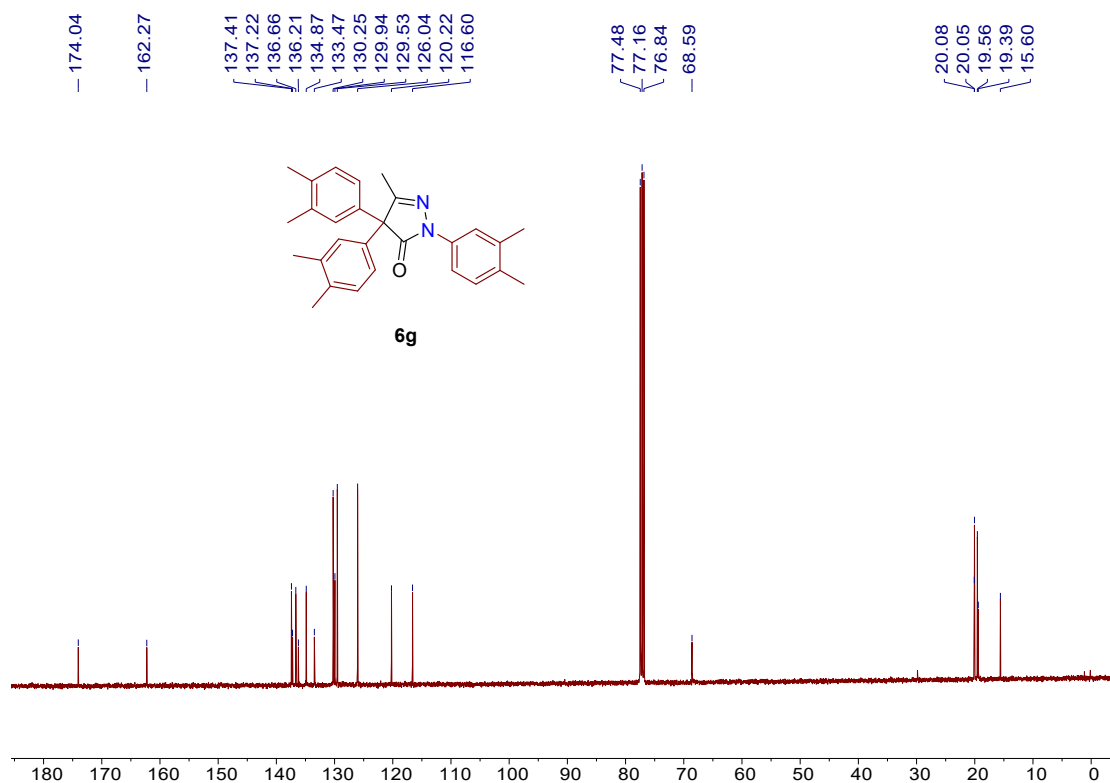

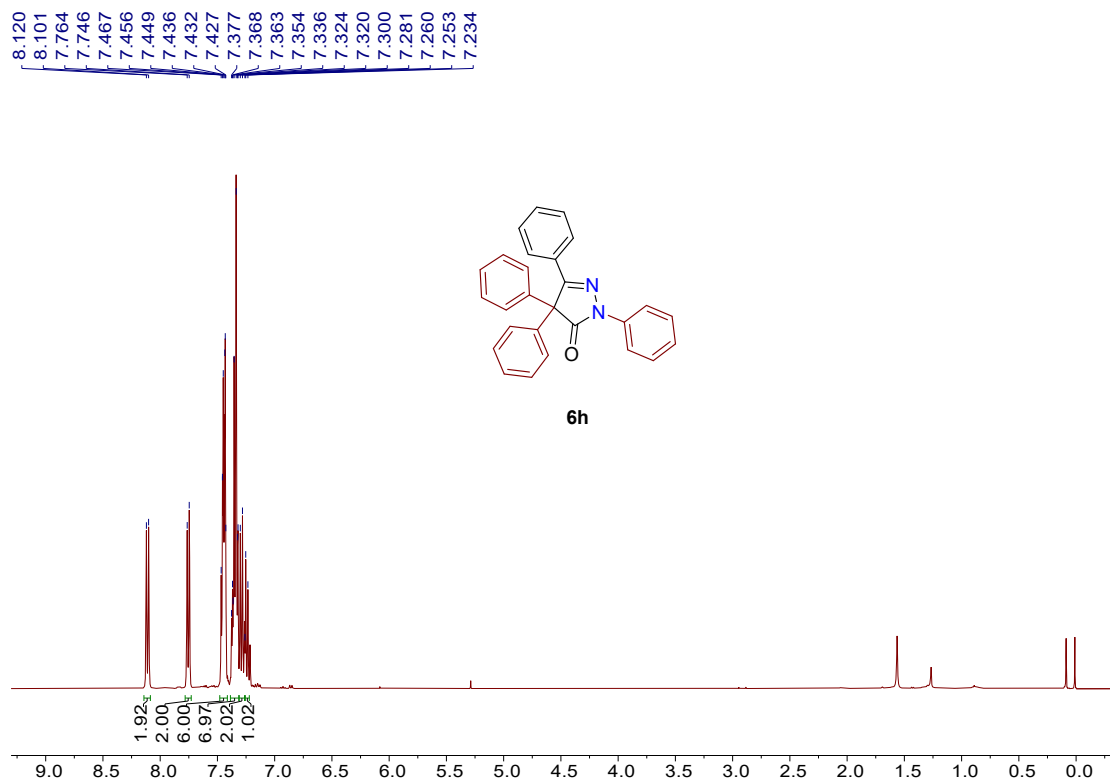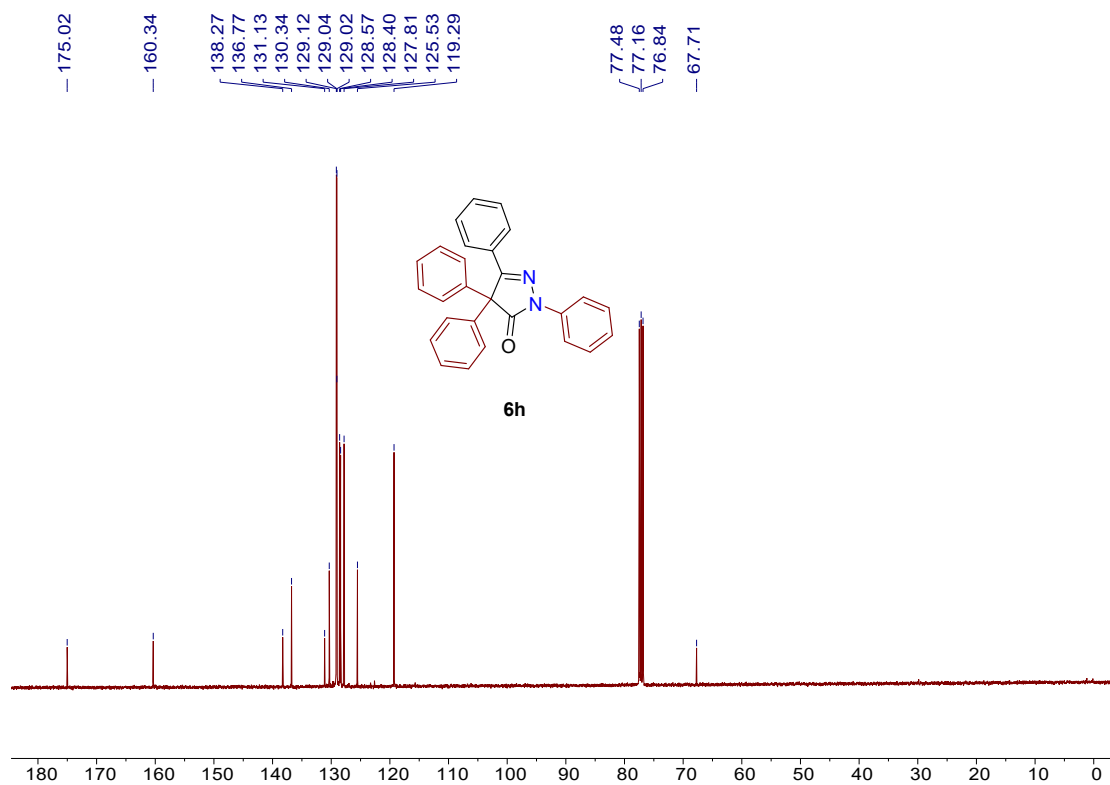

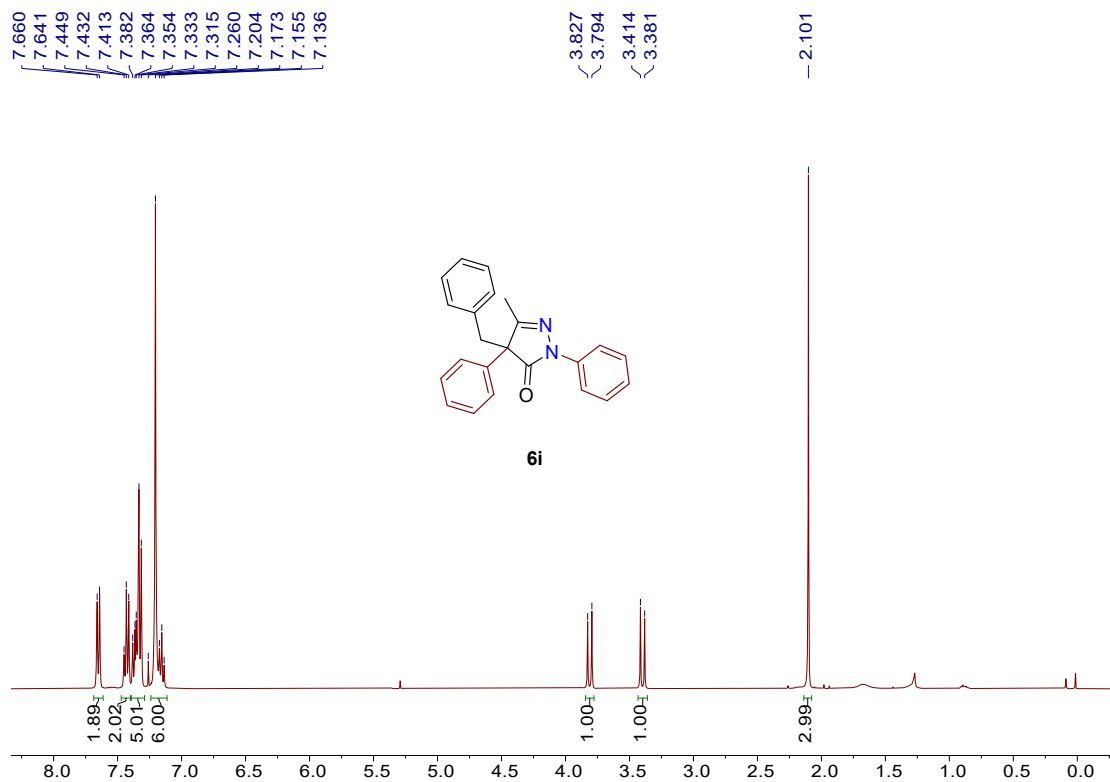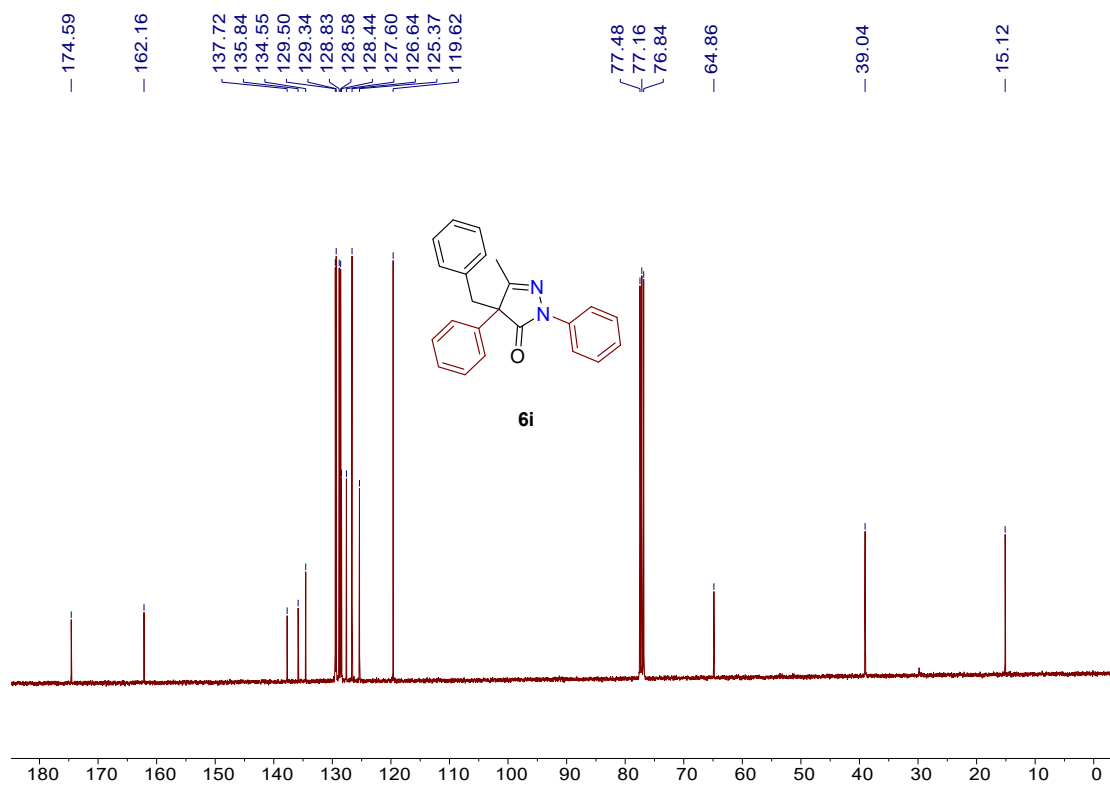



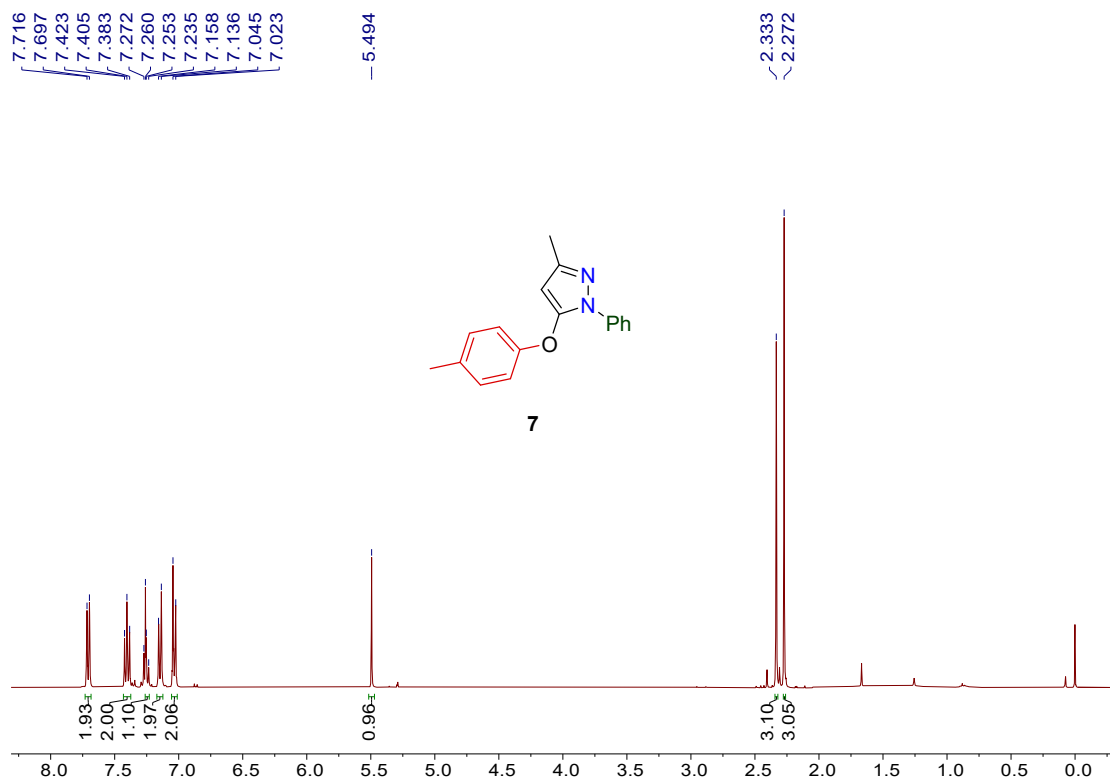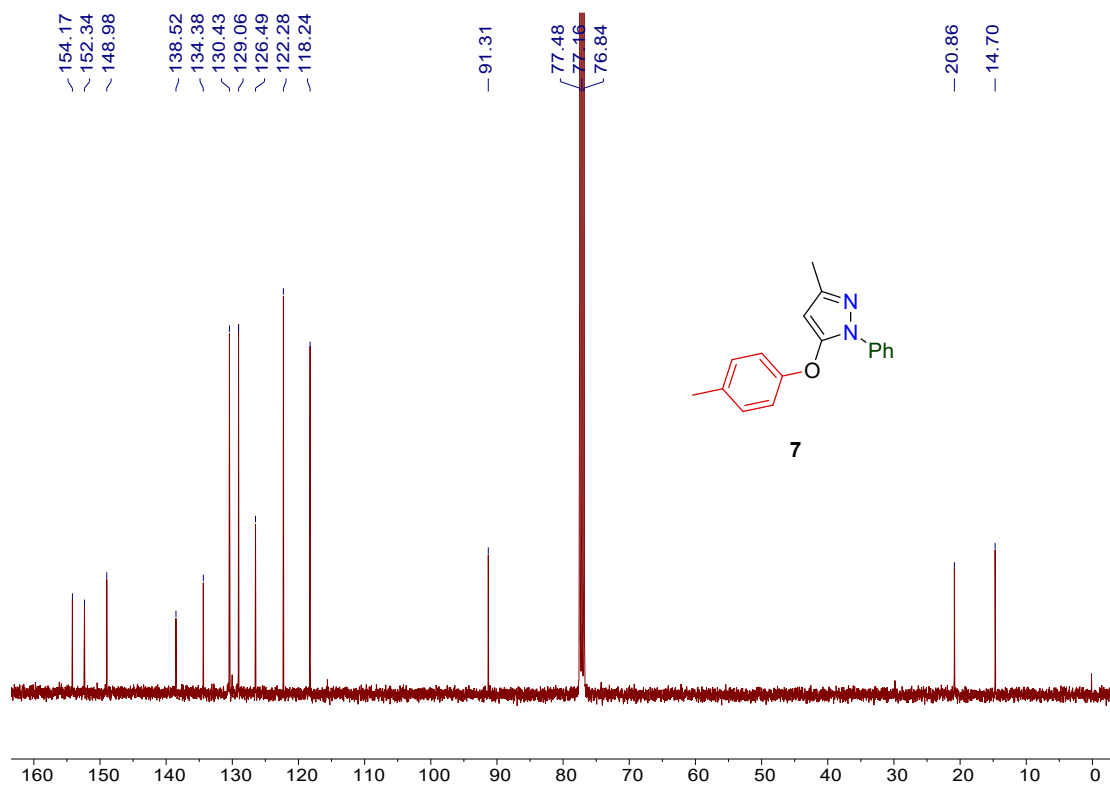

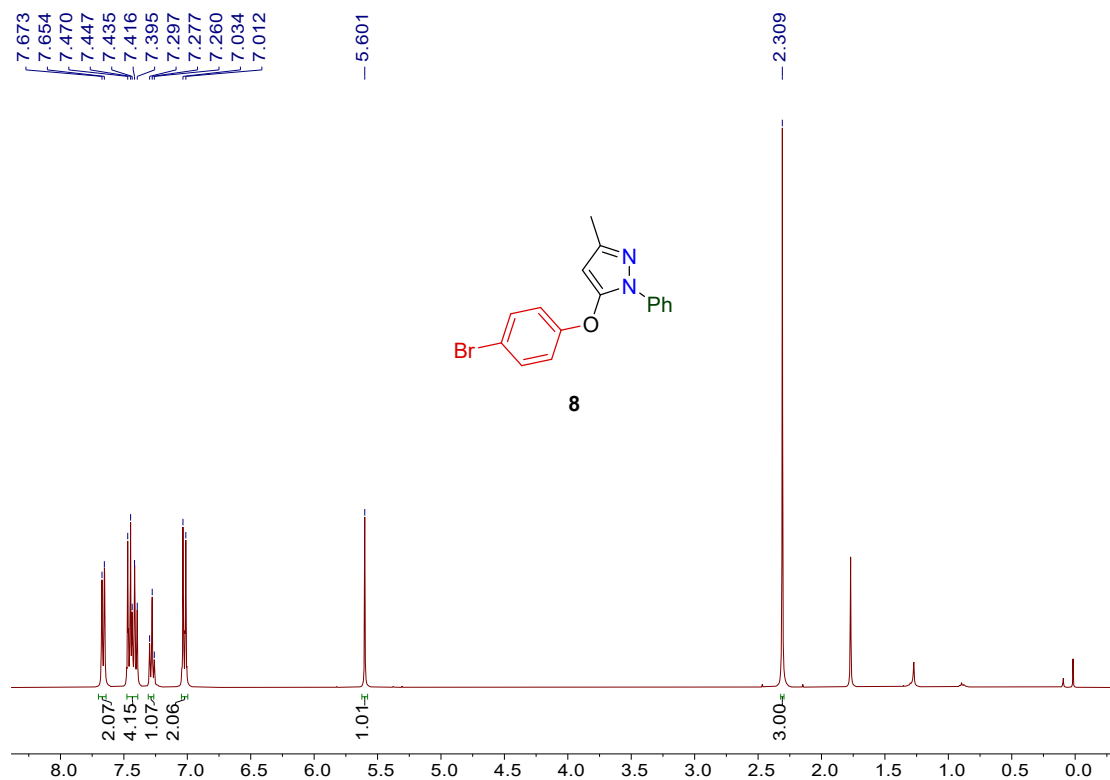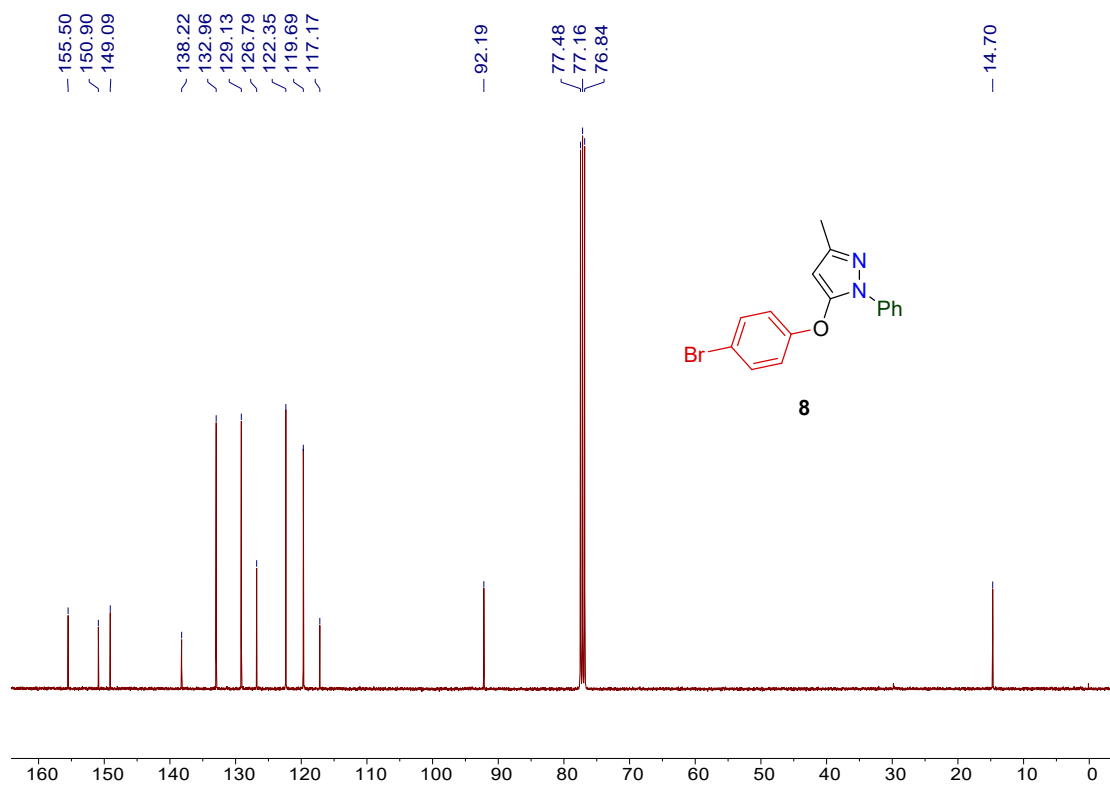

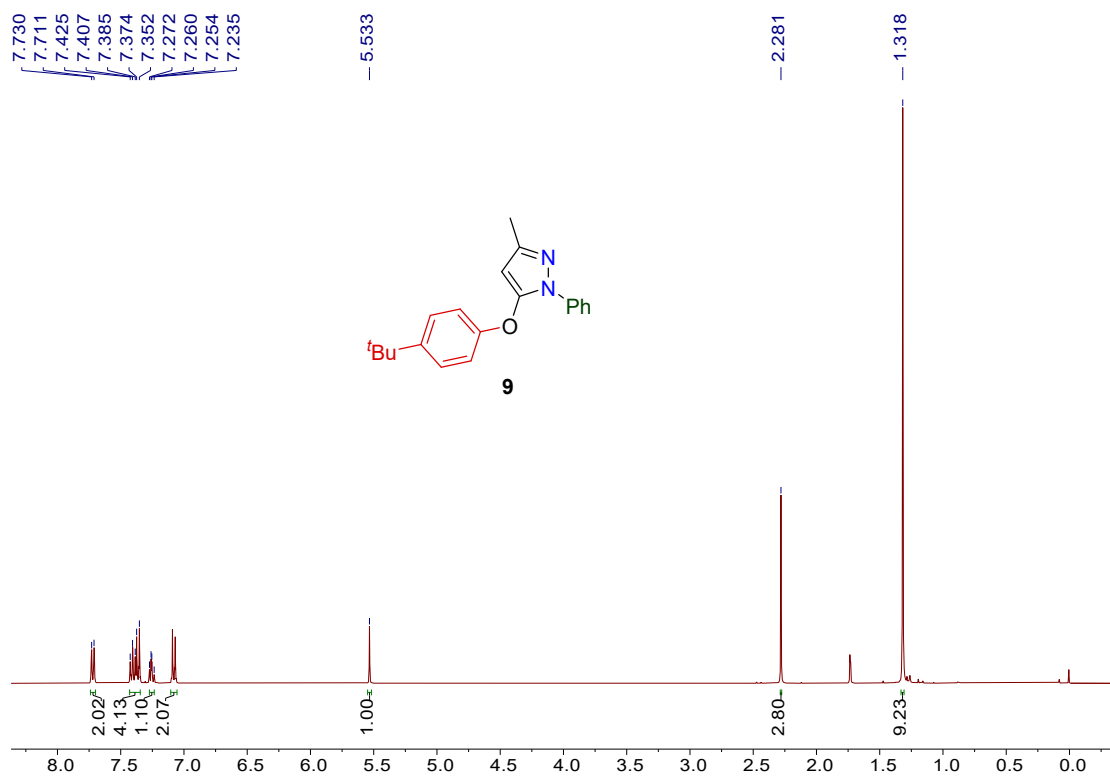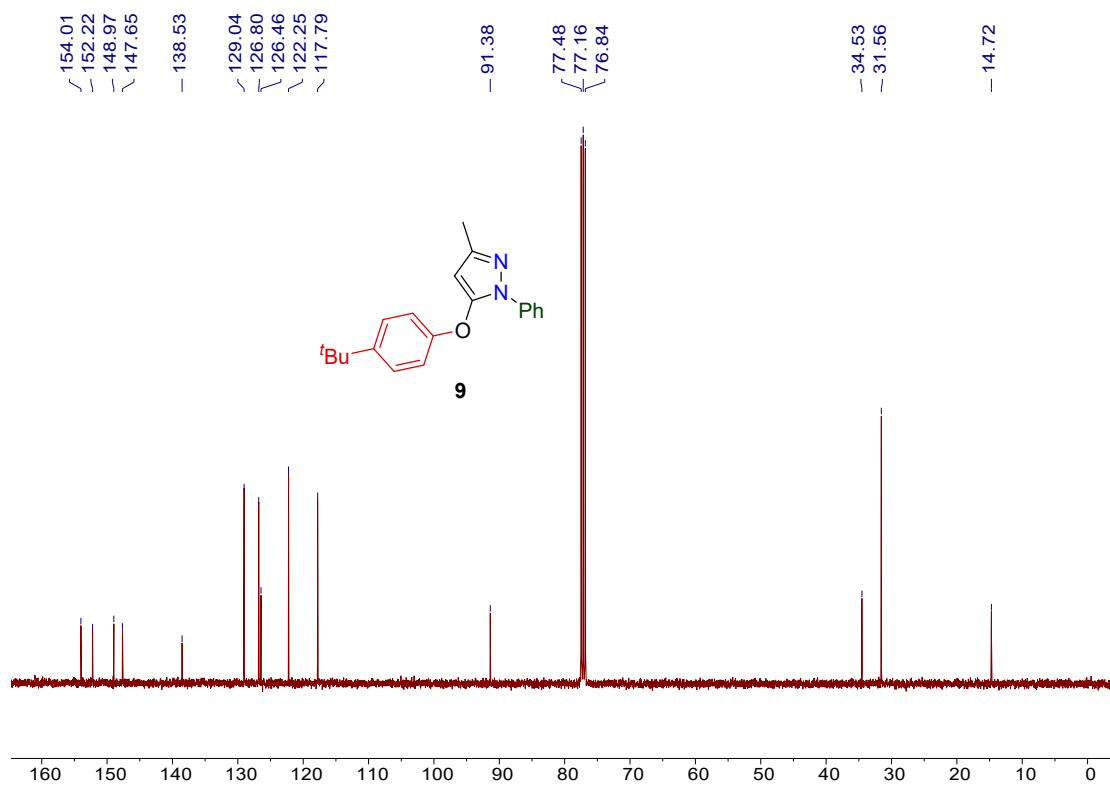

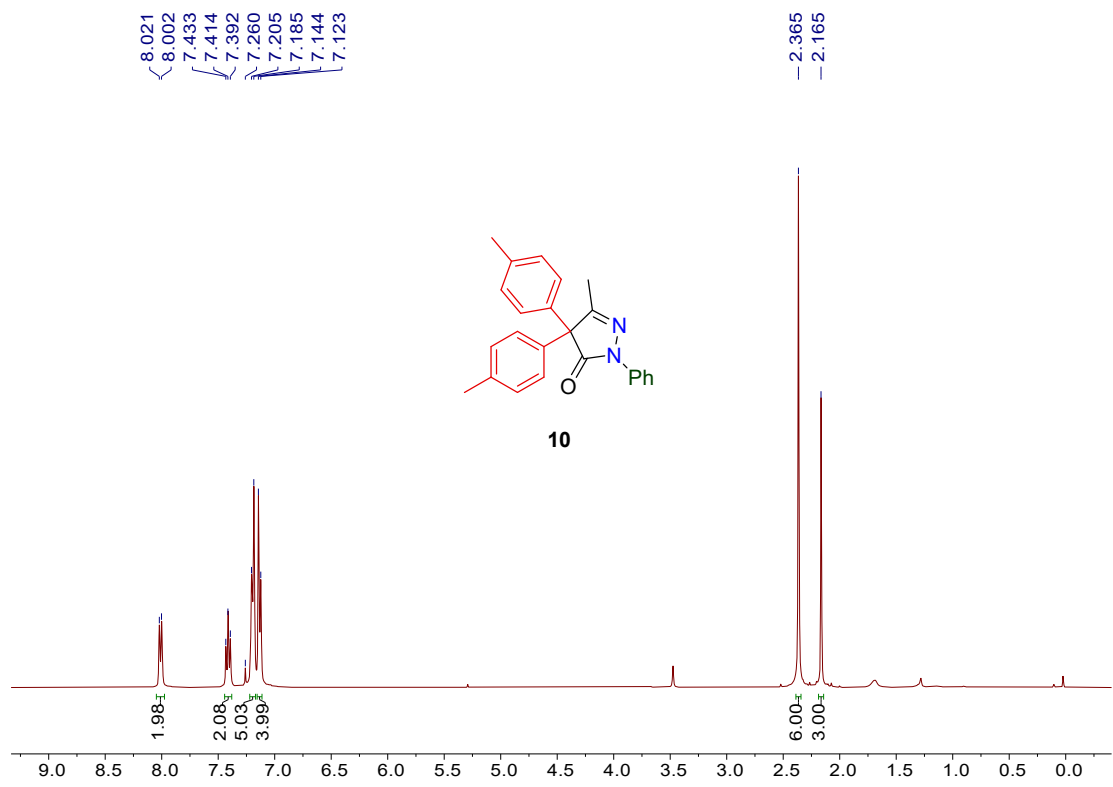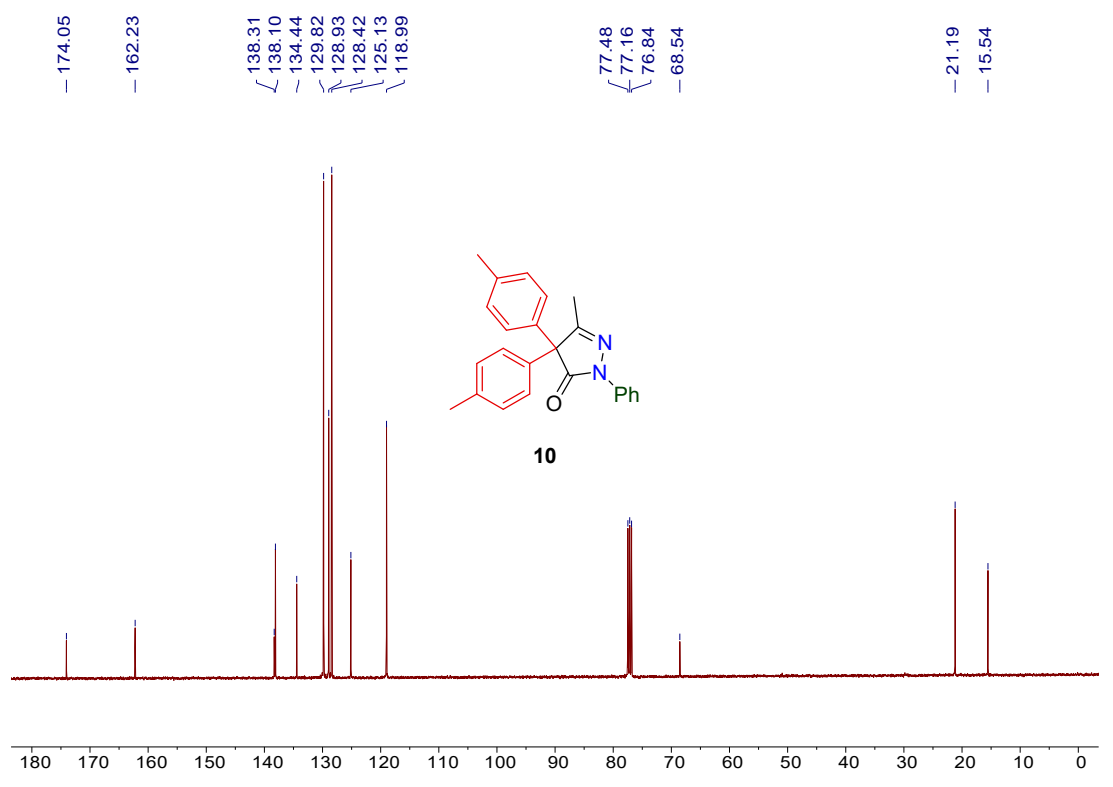

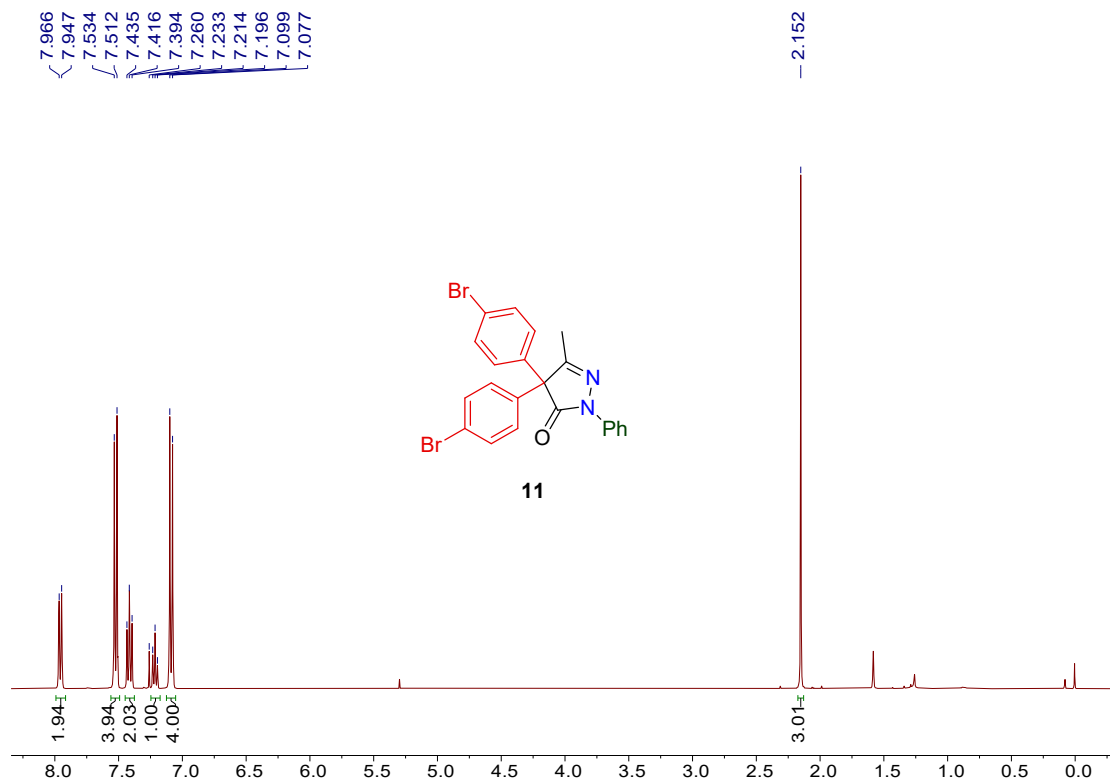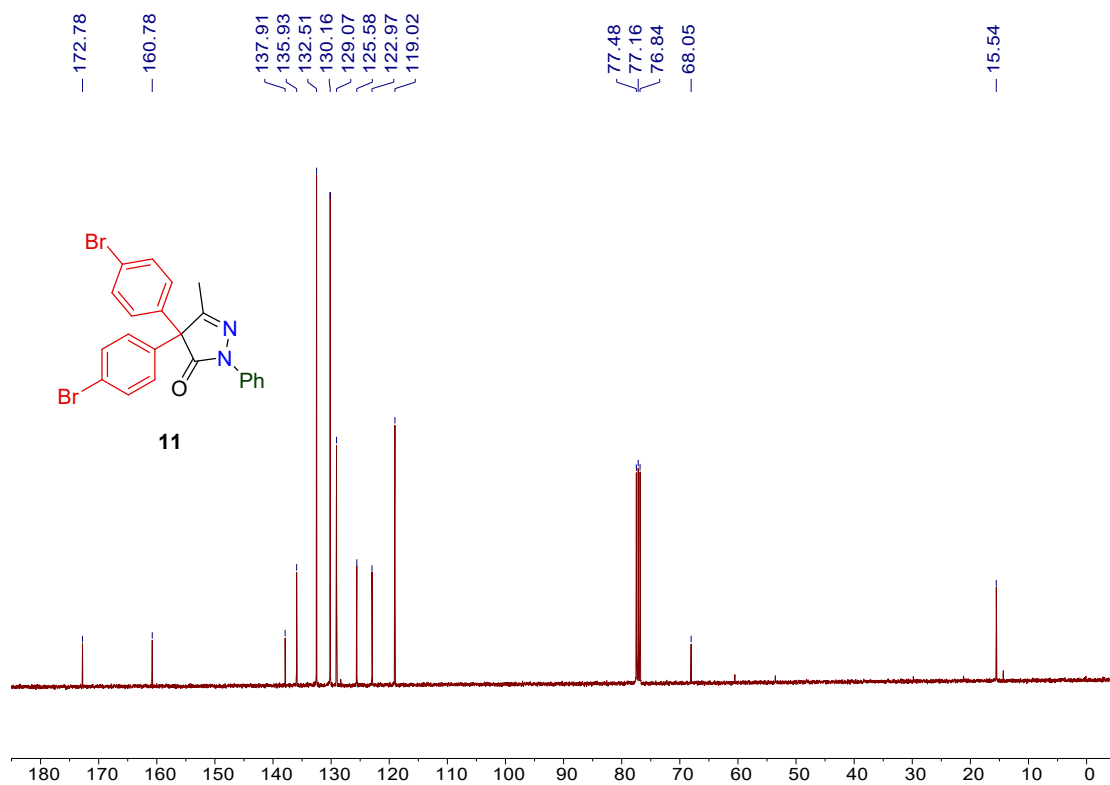

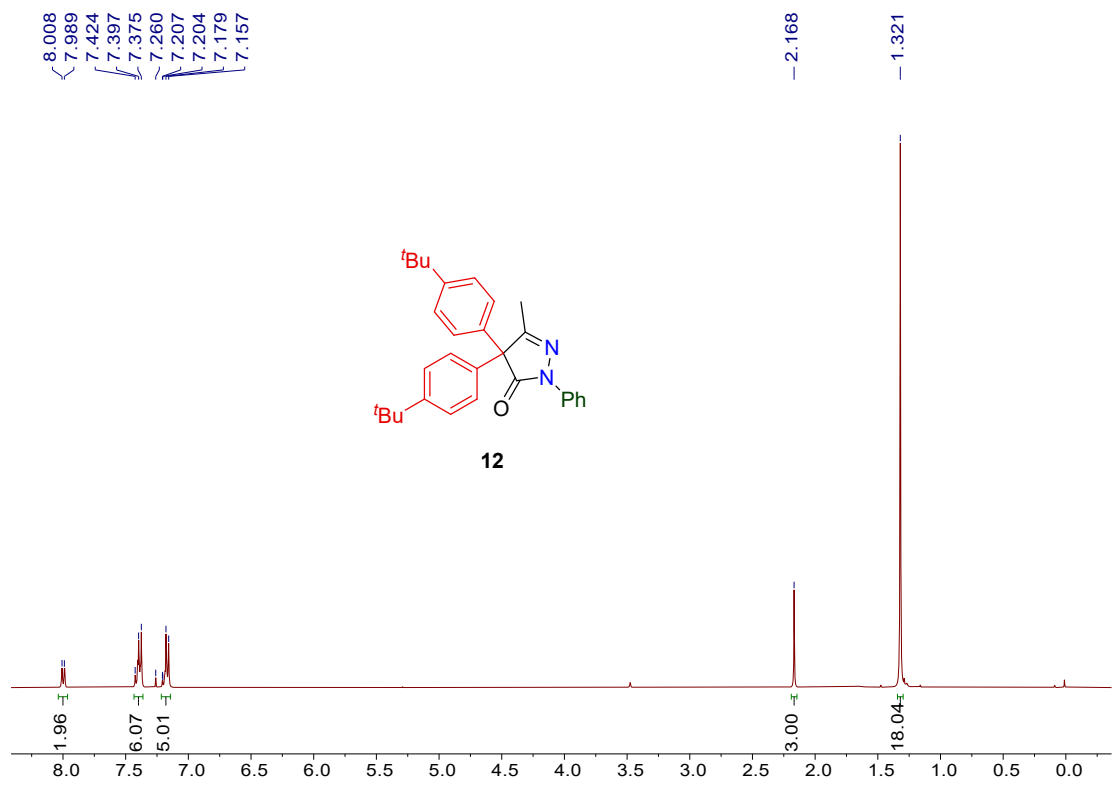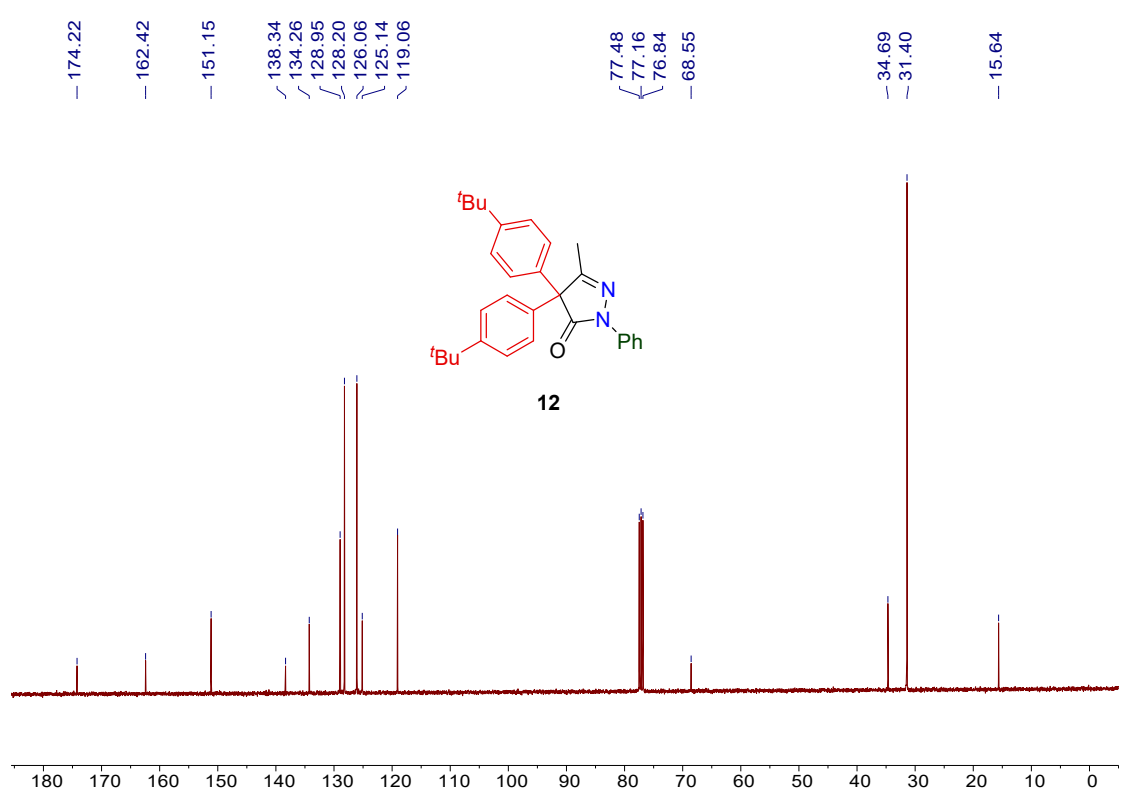

Supplement: d3ob01854g1.pdf [file d3ob01854g1.pdf]
